# Supplementary material for: Predictive classifier models built from natural products with antimalarial bioactivity using machine learning approach
Source: PubMed Central journal article supplement (PMC6161899; doi:10.1371/journal.pone.0204644), 2018-09-28
Supplement: pone.0204644.s001.pdf [file pone.0204644.s001.pdf]

**S1 Table.** Natural products that have been tested for *in-vitro* antiplasmodial activities (NAA) compiled in-house from literature, PhD and Masters Theses and public chemical databases.

| ID  | Hit_Status | pIC50           | Smiles                                                                                                                                       |
|-----|------------|-----------------|----------------------------------------------------------------------------------------------------------------------------------------------|
| N78 | A          | 6.15490196      | <chem>C1CC(C(CC(CN2C=Nc3ccccc3C2=O)=O)NC1)O</chem>                                                                                           |
| N79 | A          | 5.92081875<br>4 | <chem>[C-]#[N+]C1C2C(CCC1(C)O)C(C)(CCC2C1(C)CCC(C(C)(C)O1)[Cl])[N+]#[C-]</chem>                                                              |
| N80 | A          | 5.46852108<br>3 | <chem>C1CC2C(CC(CN3C=Nc4ccccc4C3=O)(O)O2)NC1</chem>                                                                                          |
| N81 | A          | 4               | <chem>CCC(C)C(C(CC(N1CCCC1C(C(C)C(NC(Cc1ccccc1)c1nccs1)=O)OC)=O)OC)N(C)C(C(C(C)C)NC(C(C(C)C)N(C)C)=O)=O</chem>                               |
| N82 | A          | 2.83614895<br>5 | <chem>CC(C)C(C)=CC(=O)OC1C2C34COC2(C(C(C3C2(C)CC(C(=C(C)C2CC4OC1=O)O)=O)O)O)C(=O)OC</chem>                                                   |
| N83 | A          | 2.73880543<br>4 | <chem>CC1C(C(C)(CC(O1)OC1CC(C(c2c1c(c1cc(C)c3C4C5C(C6(CO6)C(C(OC)OC)(O4)O5)(OC4CC(C(C(C)O4)(C(C)=O)O)O)Oc3c1c2O)OC)=O)O)O)OC(C)=O</chem>     |
| N84 | A          | 2.71746942<br>3 | <chem>CC1C(C(C)(CC(O1)OC1CC(C(c2c1c(c1cc(C)c3C4C5C(C6(CO6)C(C(OC)OC)(O4)O5)(OC4CC(C(C(C)O4)(C(C)=O)O)O)Oc3c1c2O)OC)=O)O)O)O</chem>           |
| N85 | A          | 2.69897000<br>4 | <chem>CC(c1cc2C(c3ccccc3C(c2o1)=O)=O)=O</chem>                                                                                               |
| N86 | A          | 2.69897000<br>4 | <chem>CC1C(C(C(C(O1)OC1=C(c2ccc(c(c2)O)O)Oc2cc(cc(c2C1=O)O)O)O)O)O</chem>                                                                    |
| N87 | A          | 2.69897000<br>4 | <chem>CC1C=C2C(=CC(=O)O2)C2(C)C1CC1C34COC(C4C(C(=O)O1)OC(C)=O)(C(C(C23)O)O)C(=O)OC</chem>                                                    |
| N88 | A          | 2.63827216<br>4 | <chem>C([C@@H]1[C@H]([C@@H]([C@H]([C@H](OC2=C(c3ccc(c(c3)O)O)Oc3cc(cc(c3C2=O)O)O)O1)O)O)O</chem>                                             |
| N89 | A          | 2.53760200<br>2 | <chem>C[C@@H]1[C@@H]([C@H]([C@H]([C@H](OC2=C(c3ccc(c(c3)O)O)Oc3cc(cc(c3C2=O)O)O)O1)O)O)O[C@@H]1[C@@H]([C@H]([C@@H]([C@@H](CO)O1)O)O)O</chem> |
| N90 | A          | 2.23932093<br>6 | <chem>CC(C)=CC(=O)OC1C2C34COC2(C(C(C3C2(C)CC(C(=C(C)C2CC4OC1=O)O)=O)O)O)C(=O)OC</chem>                                                       |
| N91 | A          | 2.2046155       | <chem>CCC(C)C(=O)OC1C2C34COC2(C)C(C(C3C2(C)C(C4OC1=O)C(C)=CC(C2O)O)O)O</chem>                                                                |
| N92 | A          | 2.20278981<br>5 | <chem>CCC(C)C(=O)OC1C2C34COC2(C)C(C(C3C2(C)C(C4OC1=O)C(C)=CC(C2O)=O)O)O</chem>                                                               |
| N93 | A          | 2.15490196      | <chem>[H]C(=C1C(c2c(cc(cc2OC(C)=O)OC(C)=O)O1)=O)c1</chem>                                                                                    |

|      |   |                 |                                                                                                       |
|------|---|-----------------|-------------------------------------------------------------------------------------------------------|
|      |   |                 | cc(c(c(c1)OC)OC(C)=O)OC                                                                               |
| N94  | A | 2.09852876<br>4 | CC1=CC(C(C2(C)C1CC1C34COC(C24))(C(C(=C)C3<br>CC(=O)O1)O)O)=O                                          |
| N95  | A | 2.05275415<br>4 | CC(=CC(=O)OC1C2C34COC2(C(C(C3C2(C)CC(C(=<br>C(C)C2CC4OC1=O)O)=O)O)C(=O)OC)C(C)(C)O                    |
| N96  | A | 1.97469413<br>5 | CC(=C)C(CC=C(C)C)Cc1c(cc(c2C(CC(c3c(cccc3O)O<br>)Oc12)=O)O)OC                                         |
| N97  | A | 1.97371279<br>6 | C1CCN2CCC3C(=CC(CCC=CC1))(C1C3(CC3C=CC<br>CCCN13)C2)O)c1c2c(ccn1)c1cccc(c1[nH]2)O                     |
| N98  | A | 1.96657624<br>5 | CC(=C)C(CC=C(C)C)Cc1c(cc(c2C(CC(c3c(cccc3O)O<br>)Oc12)=O)O)O                                          |
| N99  | A | 1.96257350<br>2 | CC(CC=CC(C(C(CC1C(c2cc(cc(c2C(=O)O1)O)OC)O<br>)O)O)O                                                  |
| N100 | A | 1.93930216      | CC12C(CC[Cl])C(NC1(C(C1CCCC=C1)O)C(=O)O2)=<br>O                                                       |
| N101 | A | 1.90308998<br>7 | C1CCN2CCC3C(=CC(CCC=CC1))(C1C3(CC3C=CC<br>CCCN13)C2)O)c1c2c(ccn1)c1cccc1[nH]2                         |
| N102 | A | 1.89911102<br>4 | CCC1CN2CCc3cc(c(cc3C2CC1CC1c2c(CCN1)c1cc(<br>ccc1[nH]2)O)OC)OC                                        |
| N103 | A | 1.89594767<br>4 | CC1Cc2ccc(c3c(CO)cc(c4c(cccc34)OC)OC)c(c2C(C)<br>N1)O                                                 |
| N104 | A | 1.85387196<br>4 | [C-<br>]#[N+]C1(C)CCC2C(C)CC3CC(C)C(C)(C4CCC1C2C<br>34)[N+]#[C-]                                      |
| N105 | A | 1.83923143<br>8 | [C-<br>]#[N+]C1(C)CCC2C(C)CC3CC(C)C(C)(C4CCC1C2C<br>34)[N+]#[C-]                                      |
| N1   | A | 1.83923143<br>8 | [H][C@@]12CC[C@]3([H])C([C@H](C)C[C@]4([H])C<br>[C@H](C)[C@]([H])(CCC1=O)[C@@]2([H])[C@]34[H<br>])=O  |
| N106 | A | 1.82390874<br>1 | CC1=CC(C(C2(C)C1CC1C34COC(C)(C24)C(C(C3C(<br>C(=O)O1)OC)O)O)=O                                        |
| N107 | A | 1.76955107<br>9 | C[C@@]1(C)[C@H]2CC[C@@]34CC(=C)[C@@H](<br>CC3=O)C[C@H]4[C@]2(C)CC([C@H]1O)=O                          |
| N108 | A | 1.72124639<br>9 | CC[C@@H](C)C(=O)O[C@H]1[C@H]2C(CC([C@@<br>H](C)CCC[C@@]1(C)O)=O)C(=C)C(=O)O2                          |
| N109 | A | 1.72124639<br>9 | CC[C@@H](C)C(=O)O[C@H]1[C@H]2C(CC([C@@<br>H](C)CCC[C@@]1(C)O)=O)C(=C)C(=O)O2                          |
| N110 | A | 1.72124639<br>9 | CC1C2C(Cc3c1cco3)C1(C)CCCC(C)(C)C1C(C2OC(<br>C)=O)OC(C)=O                                             |
| N111 | A | 1.72124639<br>9 | CCC12CCCN3CCC4(C(CC1)N(C(C)=O)c1c4ccc(c1O<br>)OC)C23                                                  |
| N112 | A | 1.69897000<br>4 | [H][C@@]12C=C(C)CC(C)(C)[C@@]2([H])[C@]([H])(<br>c2c(CCN(C)C)c3cccc3[nH]2)n2c1c(CCN(C)C)c1ccc<br>cc12 |

|      |   |                 |                                                                                          |
|------|---|-----------------|------------------------------------------------------------------------------------------|
| N114 | A | 1.69897000<br>4 | C[C@H]1CC=C[C@@H]([C@H])([C@H](CC=Cc2cc(c(c2C(=O)O1)O)OC)O)O                             |
| N113 | A | 1.69897000<br>4 | CC(C)=CCc1c2c(C=CC(C)(C)O2)c(c2C(C3C(C=C(C)C)O)c4cc(c(cc4C=3O)c12)O)O)=O)O               |
| N115 | A | 1.67672809<br>4 | CC(C)CC(=O)OC1C2C34COC2(C(C(C3C2(C)CC(C(=C(C)C2CC4OC1=O)O)=O)O)O)C(=O)OC                 |
| N116 | A | 1.6402662       | CC1C2CC3C45COC(C5C(C(=O)O3)OC(C)=O)(C(C(C4C2(C)CC(C=1O)=O)O)O)C(=O)OC                    |
| N117 | A | 1.62893213<br>8 | CC1=CC2=CC(C=C3C2=C(C=C(C)O3)N1)=O                                                       |
| N118 | A | 1.60205999<br>1 | C[C@H]1CC[C@H]([C@@H](C)[C@H]2CC[C@H]3[C@@H]4CC=C5C[C@H](CC[C@]5(C)[C@H]4CC[C@]23C)N)NC1 |
| N119 | A | 1.56863623<br>6 | CC1C2=CC=C3[C@@]4(C)CC[C@]5(CCC(=C)C[C@H]5[C@]4(C)CC[C@@]3(C)C2=CC(C=1O)=O)C(=O)OC       |
| N120 | A | 1.52287874<br>5 | [H]C(=C1C(c2c(cc(cc2O1)O)O)=O)c1cc([H])c(c(c1)O)C)O                                      |
| N121 | A | 1.45076038<br>2 | CC1CCC2C(C)C(=O)OC3C24C1CCC(C)(O3)OO4                                                    |
| N122 | A | 1.43713201<br>1 | CC1=CC(C(C2(C)C1CC1C34COC(C)(C(C(C23)O)O)C4(C(C(=O)O1)O)O)O)=O                           |
| N123 | A | 1.40893539<br>3 | CC1(C)CCC2(CCC3(C)C(=CCC4C5(C)CCC(C(C)(C)C5CCC34C)O)C2C1)C(O)=O                          |
| N124 | A | 1.36981573<br>4 | CCCCCCCc1cc(C=C2C(=CC(=C3C=CC=N3)N2)OC)[nH]c1C                                           |
| N125 | A | 1.32790214<br>2 | C1CCN2CCC3C(=CC(CCC=CC1)(C1C3(CCC3C=CCCCN13)C2)O)c1c2c(ccn1)c1cccc(c1[nH]2)O             |
| N126 | A | 1.32674390<br>9 | CC1=CC(C(C2(C)C1CC1C34C2C(CO4)(C(C2(CO2)C3(C(C(=O)O1)O)O)O)O)O)=O                        |
| N127 | A | 1.30102999<br>6 | CC(C)CC(=O)OC1C2C34COC2(C(C(C3C2(C)C(CC4OC1=O)C(C)=CC(C2O)=O)O)O)C(=O)OC                 |
| N128 | A | 1.30102999<br>6 | CCC12CCCN3CCc4c5cccc5n(C(C1)c1c(ccc5c1c1CC[N+]6(C)CC(=CC)C(CCO)CC6c1[nH]5)O)c4C23        |
| N129 | A | 1.28927646<br>8 | C[n+]1cc2cc(c(cc2c2ccc3cc(c(cc3c12)OC)O)OC)OC                                            |
| N130 | A | 1.27572413      | C1CN=C2C3=C(C(c4c2c1c[nH]4)=O)NC1CC32C=C(C(CC2S1)=O)[Br]                                 |
| N131 | A | 1.27572413      | CCCC#CC(CO)C(=O)OCCc1ccc(c2cccs2)s1                                                      |
| N132 | A | 1.27572413      | CCCCC#CC(CO)C(=O)OCCc1ccc(c2cccs2)s1                                                     |
| N133 | A | 1.26609352      | CC1C2=CC=C3C(C)(CCC4(C)C5CC(CCC5(C)CCC34C)CO)C2=CC(C=1O)=O                               |
| N134 | A | 1.25963731<br>1 | CCC(C)C1C(N2CCCC2C(NC(CCCCC(C)C)=O)C(NC(Cc2cn(c3cccc23)OC)C(N1)=O)=O)=O                  |
| N135 | A | 1.23759243      | CCC1CN2CCc3cc(c(cc3C2CC1CC1c2cc(c(cc2CCN1                                                |

|      |   |             |                                                                                                                                                                                                                        |
|------|---|-------------|------------------------------------------------------------------------------------------------------------------------------------------------------------------------------------------------------------------------|
|      |   | 4           | )O)OC)OC)OC                                                                                                                                                                                                            |
| N136 | A | 1.198942059 | CC1Cc2c(C(C)N1)c(cc(c2c1ccc(c2c(cc(C)cc12)OC)O)O)O                                                                                                                                                                     |
| N137 | A | 1.148741651 | CC1=CC(C(G2(C)C1CC1C34COC(C)(C24)C(C(C3C(C(=O)O1)O)O)O)O)=O                                                                                                                                                            |
| N138 | A | 1.13667714  | Cc1c2cnccc2c(C)c2c1c1cccc1[nH]2                                                                                                                                                                                        |
| N139 | A | 1.102372909 | C1C(C(c2cc(c(c(c2)O)O)O)O)c2cc(cc(c12)O)O)OC(c1cc(c(c(c1)O)O)O)=O                                                                                                                                                      |
| N140 | A | 1.096910013 | CC(C)=C[C@H]1C[C@@](C)(C=Cc2c(CCNC)c3cccc3[nH]2)n2c1c(CCN(C)C)c1cccc12                                                                                                                                                 |
| N141 | A | 1.070581074 | C1C2C3C=C(C4CC56C7CC8C9C5N(C(CC9OCC=C8CN47)=O)c4cccc46)C(N4C3C3(CCN(CC2=CCO)C13)c1cccc14)=O                                                                                                                            |
| N142 | A | 1.068416584 | CN1CCc2cc(c3cc2C1Cc1ccc(cc1)Oc1cc(CC2c4c(CC2C)cc(c(c4O3)O)OC)ccc1OC)OC                                                                                                                                                 |
| N143 | A | 1.064492734 | CC1CCC(c2cc(C)ccc12)=O                                                                                                                                                                                                 |
| N145 | A | 1.045757491 | CC(C)=C[C@@H]1C[C@](C)(C=Cc2c(CCN(C)C)c3cccc3[nH]2)n2c1c(CCN(C)C)c1cccc12                                                                                                                                              |
| N146 | A | 1.045757491 | CC(C)=C[C@H]1C[C@](C)(C=Cc2c(CCN(C)C)c3cccc3[nH]2)n2c1c(CCN(C)C)c1cccc12                                                                                                                                               |
| N147 | A | 1.045757491 | CC1CC(C)(C)C2C(C=1)c1c(CCN(C)c3cccc3n1C2c1c(CCN(C)c2cccc2[nH]1                                                                                                                                                         |
| N148 | A | 1.026872146 | CC1C2=CC=C3[C@@]4(C)CC[C@]5(CCC(=C)C[C@@H]5[C@]4(C)CC[C@@]3(C)C2=CC(C=1O)=O)C=O                                                                                                                                        |
| N149 | A | 1.022276395 | CC[C@@H]1[C@](C)([C@@H]([C@@H](C)N(C)C[C@@H](C)C[C@](C)([C@@H]([C@@H](C)[C@@H]([C@@H](C)C(=O)O1)O[C@H]1C[C@](C)([C@H]([C@H](C)O1)O)OC)O[C@H]1[C@@H]([C@H](C)[C@@H](C)O1)N(C)Cc1ccc(cc1)c1cn(CCC(C)C(C)C(=O)N)nn1)O)O)O |
| N150 | A | 1.009024851 | CC1=CC(C(G2(C)C1CC1C34COC(C23)(C(C(=C)C4(C(C(=O)O1)O)O)O)O)O)=O                                                                                                                                                        |
| N151 | A | 1.008773924 | [H]C12CCC3=CC4(CCC3(C2(C)CCCC1(C)CO)OO4)C(C)C                                                                                                                                                                          |
| N152 | A | 1           | CC=C1CN2C(CC34C2CC1C1=CCC(N(C13)c1cccc14)=O)C1=CC2C3CC4C5(CCN4CC3=CCO)C2N(C1=O)c1cccc15                                                                                                                                |
| N153 | A | 0.999559272 | CC(C)=CC(=O)OC1C2C34COC2(C)C(C(C3C2(C)C(CC4OC1=O)C(C)=CC(C2O)=O)O)O                                                                                                                                                    |
| N154 | A | 0.974954995 | CN1CCc2cc(c(c3c2C1Cc1ccc(cc1)Oc1cc(CC2c4cc(c(cc4CCN2)OC)O3)ccc1OC)O)OC                                                                                                                                                 |
| N155 | A | 0.971506569 | CN1CCc2cc(c3cc2C1Cc1ccc(cc1)Oc1cc(CC2c4c(CC2C)cc(c(c4O3)O)OC)ccc1OC)OC                                                                                                                                                 |

|      |   |                 |                                                                                                                                     |
|------|---|-----------------|-------------------------------------------------------------------------------------------------------------------------------------|
| N156 | A | 0.95860731<br>5 | CCc1c[n+]2ccc3c4ccccc4[nH]c3c2cc1CCO                                                                                                |
| N157 | A | 0.93998315      | C[n+]1cc2cc(c(cc2c2ccc3cc4c(cc3c12)OCO4)OC)OC                                                                                       |
| N160 | A | 0.92081875<br>4 | CC(C)=CCC1=C(c2cc(c(cc2O)OC)O)Oc2cc(cc(c2C1=O)O)O                                                                                   |
| N161 | A | 0.89274783<br>8 | CC=C(C)C(=O)O[C@@H]1[C@H]2C(C)=CC([C@H]([C@]2(C)[C@H]2C3([C@@H]([C@H](C)[C@@H]4C C(=O)O[C@H]1[C@]24CO3)O)O)O)=O                     |
| N162 | A | 0.89273171<br>3 | CC1C2=CC=C3C(C)(CCC4(C)C5CC(CCC5(C)CCC3 4C)CO)C2=CC(C=1O)=O                                                                         |
| N163 | A | 0.88605664<br>8 | C1CN=C2C3=C(C(c4c2c1c[nH]4)=O)NCCC31C=C(C (C=C1)[Br])O)[Br]                                                                         |
| N164 | A | 0.87464989<br>8 | CN1C2C(=Cc3ccccc13)N=c1ccccc1=2                                                                                                     |
| N165 | A | 0.85387196<br>4 | [H]C1C([H])C(C)(C)C2(C(C(C3([H])C(c4ccoc4CC3([H ])C2(C)C1=O)=O)O)OC(C)=O)O                                                          |
| N166 | A | 0.85387196<br>4 | CCC1CN2CCc3c4ccccc4[nH]c3C2CC1CC1c2c(CCN 1)c1ccccc1[nH]2                                                                            |
| N167 | A | 0.83863199<br>8 | CC(C1CCC(C)(C)C23CCC(C2)C(C)(C)C=13)=O                                                                                              |
| N168 | A | 0.82390874<br>1 | CC(=C)c1cc2C(c3ccccc3C(c2o1)=O)=O                                                                                                   |
| N13  | A | 0.80489802<br>4 | c1cc(ccc1[C@@H]1[C@H](C(c2ccc(cc2O1)O)=O)[C @@H]1C(c2ccc(cc2O[C@H]1c1ccc(cc1)O)O)=O)O                                               |
| N169 | A | 0.80410034<br>8 | [H][C@@]1(C(c2ccc(cc2O[C@@]1([H])c1ccc(cc1)O)O)=O)[C@@]1([H])C(c2ccc(cc2O[C@]1([H])c1ccc(cc1) O)O)=O                                |
| N170 | A | 0.79588001<br>7 | CC1C2=CC=C3C(C)(CCC4(C)C5CC(CCC5(C)CCC3 4C)CO)C2=CC(C=1O)=O                                                                         |
| N171 | A | 0.79588001<br>7 | CN1CCc2cc(c(cc2C1Cc1ccc(cc1)Oc1cc(CC2c3cc(c( cc3CCN2C)OC)O)ccc1O)O)OC                                                               |
| N172 | A | 0.79342008<br>8 | CC1C2=CC=C3C(C)(CCC4(C)C5CC(CCC5(C)CCC3 4C)CO)C2=CC(C=1O)=O                                                                         |
| N173 | A | 0.78515615<br>2 | [H][C@@]1(c2cccc(c2C(c2c(cc(C)c(c3c(cc(c(C(C)=O )c3O)OC)O)c12)O)=O)O)c1ccc2C(c3c(c(C)cc(c3C(c2 c1O)=O)O)c1c(cc(c(C(C)=O)c1O)OC)O)=O |
| N174 | A | 0.76955107<br>9 | CC(=O)OC1CC2(C)C(CC3C2(C2(C)C1C1(C)C=CC( C(C)(C)C1=C(C2=O)O)=O)O3)c1ccoc1                                                           |
| N175 | A | 0.76955107<br>9 | CN1CCc2cc(c(c3c2C1Cc1ccc(c(c1)Oc1ccc(CC2c4cc (c(cc4CCN=2)OC)O3)cc1)OC)OC)OC                                                         |
| N176 | A | 0.76488824<br>1 | CN1CCc2cc(c3cc2C1Cc1ccc(c(c1)Oc1ccc(CC2c4c(C CN2C)cc(c(c4O3)O)OC)cc1)OC)OC                                                          |
| N177 | A | 0.76347034<br>1 | CN1CCc2cc3c4cc2C1Cc1ccc(c(c1)Oc1ccc(CC2c5c( CCN2)cc(c(c5O4)O3)OC)cc1)OC                                                             |
| N179 | A | 0.74472749<br>5 | CC(C)=CCc1c(cc(c2C(C3CC4c5c(C=3Oc12)c(cc(c5 OC4(C)C)OC)O)=O)O)O                                                                     |

|      |   |                 |                                                                                                                          |
|------|---|-----------------|--------------------------------------------------------------------------------------------------------------------------|
| N180 | A | 0.74472749<br>5 | CC1CCC2C(C3=C(C)CCC13C2(C)C)=O                                                                                           |
| N178 | A | 0.74472749<br>5 | CCCCCCCCCCCCCCCC1CC(NCCCN(C)CCCN(C)CCCN1C)=O                                                                             |
| N181 | A | 0.72182080<br>2 | CC1Cc2c(C(C)N1)c(cc(c2c1ccc(c2c(cc(C)cc12)OC)O)O)O                                                                       |
| N182 | A | 0.72124639<br>9 | [H]C1([H])[C@@H](C)[C@]2([H])C=CC([C@@]2(C)[C@H]([C@@H]2C(=C)C(=O)O[C@H]12)OC(C(=CC)[C@@]([H])(C)O)=O)=O                 |
| N187 | A | 0.69897000<br>4 | C[C@@H]1[C@@H](C)C(c2cc(c(cc2[C@H]1c1ccc(c(c1)OC)OC)OC)OC)=O                                                             |
| N188 | A | 0.69897000<br>4 | C[C@@H]1[C@@H](C)C(c2cc(c(cc2[C@H]1c1ccc(c(c1)OC)OC)OC)OC)=O                                                             |
| N183 | A | 0.69897000<br>4 | C[n+]1cc2c(c3ccccc3[nH]2)c2ccccc12                                                                                       |
| N184 | A | 0.69897000<br>4 | CC(=O)OC1C(C(C)(C)C2(CCC3C(Cc4c(cco4)C3=C)C2(C)C1OC(C)=O)O)OC(C)=O                                                       |
| N185 | A | 0.69897000<br>4 | CC=C1CN2CCC34C2CC1C1C=C(C2CC56C7CC(C(CN27)=CC)C2=CCC(N(C25)c2ccccc26)=O)C(N(C13)c1ccccc14)=O                             |
| N186 | A | 0.69897000<br>4 | CCCCCCCCCCCCCCCC1CC(NCCCN(C)CCCN(C)CCCN1)=O                                                                              |
| N189 | A | 0.69080765<br>6 | CC1=CC(C(C2(C)C1CCC13COC4(C)C3C(=O)OC4C(C12)O)O)=O                                                                       |
| N190 | A | 0.67778070<br>5 | CC1=CC(C(C2(C)C1CC1C34COC(C)(C24)C(C(C3C(=O)O1)O)O)O)=O                                                                  |
| N191 | A | 0.67047657<br>4 | CN1CCc2cc(c3cc2C1Cc1ccc(c(c1)Oc1ccc(CC2c4c(CCN2C)cc(c(c4O3)OC)O)cc1)OC)OC                                                |
| N192 | A | 0.66756154      | C(C(C(c1cnc(N)[nH]1)O)[Cl])N                                                                                             |
| N193 | A | 0.64474031<br>9 | CC1C(C2(C3C4(C)C(CC5C3(CO2)C1(C(C(=O)O5)O)O)C(C)=CC(C4O)=O)O)O                                                           |
| N194 | A | 0.63685127      | CN1CCc2cc(c3cc2C1Cc1ccc(c(c1)Oc1ccc(CC2c4c(CCN2C)cc2c(c4O3)OCO2)cc1)OC)OC                                                |
| N195 | A | 0.63388110<br>9 | CC1CC2C(C)(CCC3(C)C4=CC=C5C(=CC(C(=C5C)O)=O)C4(C)CCC23C)CC=1                                                             |
| N196 | A | 0.62482708<br>7 | CC1Cc2cc(c(c3c(C)cc4cccc(c4c3O)OC)c(c2C(C)N1C)OC)OC                                                                      |
| N197 | A | 0.61978875<br>8 | [H]C1C([H])C(C)(C)C2(C(C(C3([H])C(=C([H])C(=O)O)C)c4ccoc4CC3([H])C2(C)C1=O)O)OC(C)=O)O                                   |
| N198 | A | 0.61978875<br>8 | CC[C@H]1C=CCC[C@@]2(C[C@@H]3CC[C@@H]4[C@H](C(=O)O)CCCCCCCCCCCC(N(CCCN)C[C@H](CCN)O)=O)[C@]5(CCC[C@@H](C)O5)N=C(N2)N34)O1 |
| N199 | A | 0.61978875<br>8 | CCCCCCCCCCCCCCCC1CC(NCCCN(C)CCCN(C)CCCN1C)=O                                                                             |

|      |   |                 |                                                                                                                                                                                |
|------|---|-----------------|--------------------------------------------------------------------------------------------------------------------------------------------------------------------------------|
| N200 | A | 0.61012980<br>9 | CC1Cc2cc(c(c3c(C)cc4cccc(c4c3O)OC)c(c2C(C)N1C)OC)O                                                                                                                             |
| N201 | A | 0.60797605<br>6 | CC1Cc2cc(c(c3c(C)cc4cccc(c4c3O)OC)c(c2C(C)=N1)OC)OC                                                                                                                            |
| N202 | A | 0.60205999<br>1 | CC1(C=O)C2CCC3(C)C2C=C2C(c4cc(ccc4C(C12O3)=O)O)=O                                                                                                                              |
| N205 | A | 0.58502665<br>2 | C[C@@H]1C(c2cc(c(cc2[C@@H])(c2ccc3c(c2)OCO3)[C@H]1C)OC)OC)=O                                                                                                                   |
| N204 | A | 0.58502665<br>2 | CC(=O)OC1CC(C2(C)C3Cc4c(cco4)C(C3CCC2(C1(C)C)O)=O)OC(C)=O                                                                                                                      |
| N206 | A | 0.58502665<br>2 | COc1ccc(cc1)C1=CC(=C)c2c(cc(c(c3cc(ccc3O)C3=C)C4c(cc(cc4O3)OC)O)=O)c2O1)OC)O                                                                                                   |
| N203 | A | 0.58502665<br>2 | COc1ccc(cc1)C1=CC(c2c(cc(c(c3cc(ccc3O)C3=CC(c4c(cc(cc4O3)OC)O)=O)c2O1)OC)O)=O                                                                                                  |
| N207 | A | 0.57682970<br>8 | CN1CCc2cc(c3cc2C1Cc1ccc(cc1)Oc1cc(CC2c4c(CC)N2C)cc(c(c4O3)OC)OC)ccc1OC)OC                                                                                                      |
| N208 | A | 0.56863623<br>6 | [H][C@@]1(c2cccc(c2C(c2c(cc(C)c(c3c(cc(c(C(C)=O)c3O)OC)O)c12)O)=O)O)c1ccc2C(c3c(c(C)cc(c3C(c2c1O)=O)O)c1c(cc(c(C(C)=O)c1O)OC)O)=O                                              |
| N209 | A | 0.56863623<br>6 | CC=C1CN2CCC34CC5C6CC7c8c(CC(C6COC5(C)O)C45C2CC1C(C(=O)OC)N5c1cccc13)N7C)c1cccc1n8C                                                                                             |
| N210 | A | 0.56863623<br>6 | CC1=CC(c2c(cccc2O)C1=O)=O                                                                                                                                                      |
| N211 | A | 0.56863623<br>6 | CN1C2C(=C(C3=C4C(=c5cccc5=N4)N(C)c4cccc34)c3cccc13)N=c1cccc1=2                                                                                                                 |
| N212 | A | 0.56694752<br>3 | CC1C2=CC=C3C(C)(CCC4(C)C5CC(=C)CCC5(CCC34C)CO)C2=CC(C=1O)=O                                                                                                                    |
| N213 | A | 0.55284196<br>9 | CC(c1c(cc(c(c2c(C)cc(c3C(c4c(cccc4O)C(c23)=O)=O)O)c1O)OC)O)=O                                                                                                                  |
| N214 | A | 0.53760200<br>2 | CCCCCCCC(CCCCC1CC(NCCCN(C)CCCN(C)C)CCN1C)=O)O                                                                                                                                  |
| N216 | A | 0.53711750<br>9 | C[C@H]1[C@@H]([C@@H](C)[C@@](C)(O)O[C@@H]1[C@H]1CC[C@H]([C@@H]2CC[C@H]([C@]3(C)[C@@H]([C@@H](C)[C@]4([C@@H](C)[C@H](C)[C@@H]([C@H]([C@](C)([C@H](C)OC)OC)O)O4)OC)O3)OC)O2)O1)O |
| N215 | A | 0.53711750<br>9 | CC1C(C(C)C(C)(O)OC1[C@H]1CC[C@H]([C@@H]2CC[C@H]([C@]3(C)[C@@H]([C@@H](C)C4(C(C)C)CC([C@H]([C@](C)([C@H](C)OC)OC)O)O4)OC)O3)OC)O2)O1)O                                          |
| N217 | A | 0.52287874<br>5 | [H][C@@]1(CCCCCCCC(O)=O)C[C@@](C)(CC(=O)OC)OO1                                                                                                                                 |
| N218 | A | 0.52287874<br>5 | [H]c1ccc(c2c1C(c1c(c(c(c(CCC=C(C)C)c1O)O)OC)N2C)=O)O                                                                                                                           |
| N12  | A | 0.52287874      | c1c2C(=O)Oc3c4c(cc(c3O)O)C(=O)Oc(c24)c(c1O)O                                                                                                                                   |

|      |   |                 |                                                                                                                         |
|------|---|-----------------|-------------------------------------------------------------------------------------------------------------------------|
|      |   | 5               |                                                                                                                         |
| N220 | A | 0.52287874<br>5 | COc1ccc(cc1c1c(cc(c2C(=C)C=C(c3ccc(cc3)O)Oc12)O)O)C1=CC(c2c(cc(cc2O1)O)O)=O                                             |
| N219 | A | 0.52287874<br>5 | COc1ccc(cc1c1c(cc(c2C(C=C(c3ccc(cc3)O)Oc12)=O)O)O)C1=CC(c2c(cc(cc2O1)O)O)=O                                             |
| N221 | A | 0.52094784<br>2 | CCC1CN2CCc3cc(c(cc3C2CC1CC1=C2C=C(C(C=C2CCN1)=O)OC)OC)OC                                                                |
| N222 | A | 0.50850574<br>8 | [H]C12CCC34C[C@@H](CCC3(C2(C)CCCC1(C)CO)OO4)C(C)C                                                                       |
| N223 | A | 0.49485002<br>2 | C[C@@H]1C(c2cc(c(cc2[C@@H](c2ccc(c(c2)OC)OC)[C@H]1C)OC)OC)=O                                                            |
| N224 | A | 0.49485002<br>2 | C[C@@H]1C(c2cc(c(cc2[C@@H](c2ccc(c(c2)OC)OC)[C@H]1C)OC)OC)=O                                                            |
| N225 | A | 0.48248923<br>9 | [H][C@@]12C[C@@H](C)CC[C@]2([H])C(C)(C)Oc2cc(C=Cc3ccccc3O)cc(c12)O                                                      |
| N226 | A | 0.48148606      | CCCCCCCC(CCCCC1CC(NCCCN(C)CCCCN(C)CCCN1)=O)O                                                                            |
| N227 | A | 0.47156403<br>2 | CC1C2=CC=C3C(C)(CCC4(C)C5CC(=C)CCC5(CCC34C)CO)C2=CC(C=1O)=O                                                             |
| N228 | A | 0.47154856<br>9 | CCC1CC2CC3(C1N(CCCc1c4cc(c(cc4[nH]c13)C1CC3C(C(Cc4c5ccccc5[nH]c14)N(C)CC3=CC)C(=O)OC)OC)C)C2)C(=O)OC                    |
| N229 | A | 0.46777671      | CN1CCc2c(cc(c(c2O)OC)OC)C1Cc1ccc(cc1)Oc1c2CC3c4c(CCN3C)c(c(c(c4c2cc(c1OC)OC)OC)OC)O                                     |
| N230 | A | 0.46400177<br>3 | CC1Cc2c(C(C)N1C)c(cc(c2c1ccc(c2c(cc(C)cc12)OC)O)OC)O                                                                    |
| N231 | A | 0.46344155<br>7 | [H][C@@]12CCC3=C[C@]4(CC[C@@]3([C@@]1(C)CCC[C@@]2(C)CO)OO4)C(C)C                                                        |
| N232 | A | 0.46218090<br>5 | CC1CCC2C(CC2(C)C)C(=C)CCC=1                                                                                             |
| N233 | A | 0.45593195<br>6 | CN1CCc2cc(c3cc2C1Cc1ccc(cc1)Oc1cc(CC2c4c(CC2)cc(c(c4O3)OC)OC)ccc1OC)OC                                                  |
| N234 | A | 0.45222529<br>5 | CN1CCc2cc(c3cc2C1Cc1ccc(cc1)Oc1c2C(Cc4ccc(c(c4)O3)O)N(C)CCc2cc(c1O)OC)OC                                                |
| N235 | A | 0.44873582<br>8 | CC1Cc2c(C(C)N1C)c(cc(c2c1ccc(c2c(cc(C)cc12)OC)OC)OC)O                                                                   |
| N236 | A | 0.44769941<br>8 | CC=C1CN2CCc3c4ccccc4[nH]c3C2CC1Cc1c2c(ccn1)c1cc(ccc1[nH]2)O                                                             |
| N237 | A | 0.44608515<br>2 | C[C@@]12C[C@H]3[C@]4([C@@]5(C)C(C=C[C@@]6(C)CO[C@H]([C@H]56)[C@H]([C@@]4(C)C1=C[C@H]2C1=CC(O)OC1=O)OC(c1ccccc1)=O)=O)O3 |
| N238 | A | 0.44369749<br>9 | CC=C1CN2CCC3c4ccccc4N4C(C1CC2C34C=CC1=COCC2C1CC1c3c(CC2N1C)c1ccccc1n3C)C(=O)OC                                          |
| N239 | A | 0.44369749<br>9 | CN1CCc2cc3c(c4c5ccccc5cc1c24)OCO3                                                                                       |



|      |   |                 |                                                                                                               |
|------|---|-----------------|---------------------------------------------------------------------------------------------------------------|
| N240 | A | 0.43179827<br>6 | CC1=CC(C(=CC2=C1CC1CC(C3(C)C(CC4C(C)=CC(C(=CC=4O3)O)=O)CC(C)(C)C=CCC1(C)O2)O)O)=O                             |
| N241 | A | 0.43070167<br>2 | CN1CCc2cc(c3cc2C1Cc1ccc(c(c1)Oc1ccc(CC2c4c(CCN2C)cc(c(c4O3)OC)OC)cc1)OC)OC                                    |
| N242 | A | 0.42909894<br>8 | CN1C(C(c2ccnc3c4cc(ccc4c(c1c23)OC)OC)=O)=O                                                                    |
| N243 | A | 0.41103722<br>7 | CC1CCC2C(C)(C)C(CCC2(C)C12Cc1c(cc(C=O)c(C=O)c1O2)O)O                                                          |
| N244 | A | 0.39794000<br>9 | [H]C1C[C@@H]([C@]2(C)[C@@]3([H])Cc4c(cco4)[C@]([H])(C)C3([H])[C@H](C([H])[C@]2(C1(C)C)O)O)C(C)=O              |
| N245 | A | 0.39794000<br>9 | CCC=CC(CC)CC1(C)CC(CC)C(CC(=O)OC)OO1                                                                          |
| N246 | A | 0.39636189<br>2 | CC1C2=CC=C3C(C)(CCC4(C)C5CC(C)(CCC5(C)CC C34C)C(O)=O)C2=CC(C=1O)=O                                            |
| N247 | A | 0.38744609<br>9 | CC1C2=CC=C3C(C)(CCC4(C)C5CC(C)(CCC5(C)CC C34C)C(=O)OC)C2=CC(C=1O)=O                                           |
| N248 | A | 0.38721614<br>3 | [H]C1([H])C(C)C2([H])C=CC([C@@]2(C)C([C@@H]2 C(C)C(=O)O[C@H]12)OC(C=C)[C@@]([H])(C)O)=O)=O                    |
| N249 | A | 0.38404994<br>8 | CC1CCC2C(C)C3C(CC4C5CC=C6CC(CCC6(C)C5C CC34C)OC3C(C(C(CO)O3)O)OC3C(C(C(CO)O 3)O)O)OC3C(C(C(C(CO)O3)O)O)O)N2C1 |
| N250 | A | 0.37655999<br>7 | CC1C2=CC=C3C(C)(CCC4(C)C5CC(=C)CCC5(C)C CC34C)C2=CC(C=1O)=O                                                   |
| N251 | A | 0.33292451<br>1 | COC1CC2C3(CCN2Cc2cc4c(cc23)OCO4)C2C1O2                                                                        |
| N252 | A | 0.32909644<br>1 | CC1Cc2c(C(C)N1C)c(cc(c2c1ccc(c2c(cc(C)cc12)OC) O)OC)O                                                         |
| N253 | A | 0.32392857<br>7 | CCCCC=CC(=O)OC1CC2C(CCCCC(CCC)O)CCC C2NC1C                                                                    |
| N254 | A | 0.32388080<br>9 | Cc1cc(c2c(ccc(c3c(cc(c4c3C[C@@H](C)N[C@@H]4 C)O)O)c2c1)O)OC                                                   |
| N255 | A | 0.31875876<br>3 | C1=C(c2ccc(cc2)Oc2c(cc(c3C(C=C(c4ccc(cc4)O)Oc 23)=O)O)O)Oc2cc(cc(c2C1=O)O)O                                   |
| N256 | A | 0.31875876<br>3 | C1=C(c2ccc(cc2)Oc2c(cc(c3C(C=C(c4ccc(cc4)O)Oc 23)=O)O)O)Oc2cc(cc(c2C1=O)O)O                                   |
| N257 | A | 0.30102999<br>6 | [H]c1c(C)cc(c2C(c3c(ccc(c3O)[C@@]3([H])c4cccc(c4 C(c4c3cc(C)cc4O)=O)O)C(c12)=O)=O)O                           |
| N7   | A | 0.30102999<br>6 | C[C@@]12CCC[C@]3(C)c4cc5C(C6=C(C(c5cc4C([ C@]([C@H]23)(O)OC1)=O)=O)S(CCN6)(=O)=O)=O                           |
| N258 | A | 0.30102999<br>6 | c1c2C(=O)Oc3c4c(cc(c3O)O)C(=O)Oc(c24)c(c1O)O                                                                  |
| N259 | A | 0.30102999<br>6 | CC1CC2C(Cc3c[nH]c4cccc2c34)N(C)C1                                                                             |
| N260 | A | 0.30102999      | CCC(C)C1C(C)C[C@H](C)C(C2=C(C(=CN(C2=O)O)                                                                     |

|      |   |                 |                                                                                                                       |
|------|---|-----------------|-----------------------------------------------------------------------------------------------------------------------|
|      |   | 6               | c2cccc2)O)O1                                                                                                          |
| N261 | A | 0.30102999<br>6 | CCN(CC)C(NC1CC2C(Cc3c[nH]c4cccc2c34)N(C)C1)=O                                                                         |
| N262 | A | 0.30102999<br>6 | CN1CCCC1c1c(ccc2c3CC[n+]4cc(C=C)c(CC5c6c(CCN5C)c5cccc5[nH]6)c(c4c3[nH]c12)O)O                                         |
| N263 | A | 0.29499204<br>1 | CN1CCCC1c1c(ccc2c3CC[n+]4cc(C=C)c(CC5c6c(CCN5C)c5cccc5[nH]6)c(c4c3[nH]c12)O)O                                         |
| N265 | A | 0.29305823<br>2 | CN1CCc2cc(c3cc2C1Cc1ccc(c(c1)Oc1ccc(CC2c4c(CCN2C)cc(c(c4O3)OC)O)cc1)OC)OC                                             |
| N264 | A | 0.29305823<br>2 | CN1CCc2cc(c3cc2C1Cc1ccc(c(c1)Oc1ccc(CC2c4c(CCN2C)cc(c(c4O3)OC)OC)cc1)O)OC                                             |
| N266 | A | 0.27685433<br>9 | CC1Cc2c(c3ccc(c4c(cc(C)cc34)O)OC)c(cc(c2C(C)N1)OC)O                                                                   |
| N267 | A | 0.25963731<br>1 | CC(C)=CCc1c2c(C=CC(C)(C)O2)c(c2C(C3CC4c5c(C=3Oc12)c(cc(c5OC4(C)C)O)O)=O)O                                             |
| N268 | A | 0.25181197<br>3 | C[C@@]12CC[C@@H]3[C@@]4(C)C(C=C[C@@]5(C)CO[C@H]([C@H]45)[C@H]([C@@]3(C)C1=CC[C@H]2c1ccoc1)O)=O                        |
| N269 | A | 0.25054112<br>6 | COc1ccc2CC3c4cc5c(cc4CCN=3)Oc3c(cc4CCN[C@@H](Cc6ccc(cc6)Oc1c2)c4c3O5)OC                                               |
| N270 | A | 0.24948666<br>1 | C[n+]1ccc2c3cc(ccc3[nH]c2c1)[Cl]                                                                                      |
| N272 | A | 0.24055880<br>3 | CC1CCC2(C(C)C3C(CC4C5CC=C6CC(CCC6(C)C5CCC34)OC3C(C(C(CO)O3)O)OC3C(C(C(CO)O3)O)O)OC3C(C(C(C(CO3)O)O)O)O2)NC1           |
| N274 | A | 0.23574927<br>9 | CC1C2=CC=C3C(C)(CCC4(C)C5CC(C)(CCC5(C)CC C34C)C(=O)OC)C2=CC(C=1O)=O                                                   |
| N276 | A | 0.22184875      | C[C@@]12CC[C@@H]3[C@@]4(C)C(C=C[C@@]5(C)CO[C@H]([C@H]45)[C@H]([C@@]3(C)C1=CC[C@H]2c1ccoc1)O)=O                        |
| N277 | A | 0.22184875      | CC(C)CC(=O)O[C@H]1C(=O)O[C@@H]2C[C@H]3C(C)=CC([C@H]([C@]3(C)[C@H]3[C@H]([C@@H]([C@@]4(C(O)=O)[C@H]1[C@]23CO4)O)O)O)=O |
| N279 | A | 0.20760831<br>1 | CC(C)CC(=O)O[C@@H]1[C@H]([C@H]2C(=C)C(=O)O)[C@@H]2C[C@@H](C)C=CC([C@@]1(C)O)=O)O                                      |
| N278 | A | 0.20760831<br>1 | CC(C)CC(=O)O[C@H]1[C@H]2C(=C)C(=O)O[C@@H]2C[C@@H](C)C=CC([C@](C)([C@@H]1O)O)=O                                        |
| N280 | A | 0.20760831<br>1 | CC(C)CC(=O)OC1C2C(CC(C)C=CC(C(C)C1OC(C)=O)O)=O)OC(C2=C)=O                                                             |
| N281 | A | 0.20760831<br>1 | CCC(C)C(=O)OC1CC2C(C)(CC=C(C)C=C)C(C)CC(C23C(OC(C3=C1)OC(C)=O)OC(C)=O)O                                               |
| N282 | A | 0.20065945<br>1 | C[C@@H]1C(c2cc(c(cc2[C@@H](c2ccc(c(c2)OC)OC)[C@@H]1C)OC)OC)=O                                                         |
| N283 | A | 0.19983820<br>9 | CC1=CC(C(C2(C)C1CC(C13COC4(C)C3C(=O)OC4C(C12)O)O)O)=O                                                                 |

|      |   |                 |                                                                                                                                                 |
|------|---|-----------------|-------------------------------------------------------------------------------------------------------------------------------------------------|
| N284 | A | 0.19382002<br>6 | CC(C)[C@@H]1CCC2(C)C3C1C2C(C=C3C)=O                                                                                                             |
| N285 | A | 0.19382002<br>6 | COc1cc2c(CC[n+] <sup>3</sup> cc4cc(c(cc4cc23)OC)OC)cc1O                                                                                         |
| N286 | A | 0.19362501<br>7 | CC(C)C=Cc1c(cc(C=Cc2ccc(cc2O)O)cc1O)O                                                                                                           |
| N23  | A | 0.19362500<br>2 | CC(C)C=Cc1c(cc(C=Cc2ccc(cc2O)O)cc1O)O                                                                                                           |
| N287 | A | 0.18782222<br>6 | CC1CCC2(C(C)C3C(CC4C5CC=C6CC(CCC6(C)C5<br>CCC34C)OC3C(C(C(C(CO)O3)OC3C(C(C(C(CO)O3)<br>O)O)O)OC3C(C(C(C(CO)O3)O)O)O)O2)NC1                      |
| N288 | A | 0.18708664<br>3 | [H][C@]12[C@H](C[C@@]3([H])C(C)(C)[C@H](CC[<br>C@]3(C)[C@@]2([H])CC=C(C=C)[C@@H]1C)O)O                                                          |
| N289 | A | 0.18708664<br>3 | [H]C1C([H])C(C)(C)C2(C(C([H])C3([H])C(=C([H])C(=<br>O)OC)c4ccoc4CC3([H])C2(C)C1=O)OC(C)=O)O                                                     |
| N290 | A | 0.18541948<br>4 | CC1CCC2(C(C)C3C(CC4C5CCC6CC(CCC6(C)C5C<br>CC34C)OC3C(C(C(C(CO)O3)OC3C(C(C(C(CO)O3)<br>O)OC3C(C(C(CO3)O)O)O)OC3C(C(C(C(CO)O3)O)O<br>O)O)O)O2)NC1 |
| N291 | A | 0.18045606<br>5 | CC(C)=CCC1=C(c2cc(c(cc2OC)OC)O)Oc2cc(cc(c2C<br>1=O)O)O                                                                                          |
| N292 | A | 0.17849378<br>5 | C[C@]12C(C=C[C@@]3(C)COC(=C[C@]4(C)[C@@<br>]25[C@H](C[C@@]2(C)[C@@H](C[C@@H]6[C@@]<br>24O6)C2=CC(O)OC2=O)O5)[C@H]13)=O                          |
| N293 | A | 0.17392519<br>7 | CC(C)=CCCC(C)=CCCC(C)(C=C)c1ccc(c(c1)O)O                                                                                                        |
| N294 | A | 0.17392519<br>7 | CC(C)=CCCC(C)=CCCC(C)(C=C)c1ccc(c(c1)O)O                                                                                                        |
| N295 | A | 0.15490196      | CC(C)=CCc1c(cc2c(C(c3c4C=CC(C)(C)Oc4c(c(CC=<br>C(C)C)c3O2)O)=O)c1O)O                                                                            |
| N296 | A | 0.15490196      | CCC(C)C1C2=NC(C(C)O2)C(NCc2nc(cs2)C(NC(C(C<br>)CC)c2nc(cs2)C(N1)=O)=O)=O                                                                        |
| N297 | A | 0.15251871<br>6 | CC(c1c(cc(c2c(C)cc(c3C(c4c(ccc4O)C(c23)=O)=O<br>)O)c1O)O)[C@H]1[C@@H]([C@H]([C@@H]([C@<br>@H](CO)O1)O)O)O)=O                                    |
| N298 | A | 0.14874165<br>1 | CN1CCc2cc(c(c3c2C1CC31CCC2(C(C1)OC)c1c(CC<br>N2)c2cc(c(cc2[nH]1)OC)OC)O)OC                                                                      |
| N299 | A | 0.14642345<br>6 | CC1CCC2C(C)C3C(CC4C5CC=C6CC(CCC6(C)C5C<br>CC34C)OC3C(C(C(C(CO)O3)OC3C(C(C(C(CO)O3)O<br>O)O)O)OC3C(C(C(C(CO)O3)O)O)O)N2C1                        |
| N300 | A | 0.12861476<br>2 | C1CCN2CCC3C(=CC(CCC=CC1)(C1C3(CC3C=CC<br>CCCN13)C2)O)c1c2c(ccn1)c1cc(ccc1[nH]2)O                                                                |
| N302 | A | 0.09988240<br>3 | COc1cc2CC[n+] <sup>3</sup> cc4c(ccc(c4OC)OC)cc3c2cc1OC                                                                                          |
| N303 | A | 0.09691001<br>3 | [H]C1CC(C)(C)C2(C(C3C4([H])C(C(=O)O3)c3ccoc3C<br>C4([H])C2(C)C1=C([H])OC(C)=O)OC(C)=O)O                                                         |

|      |   |                 |                                                                                                                                       |
|------|---|-----------------|---------------------------------------------------------------------------------------------------------------------------------------|
| N305 | A | 0.09691001<br>3 | C(C(=O)O[C@H]1[C@@H]([C@@H](COC(CC2(C=C<br>C(C=C2)=O)O)=O)O[C@H]([C@@H]1OC(Cc1cccc(cc<br>1)O)=O)OC(CC1(C=CC(C=C1)=O)O)=O)O)c1cccc1    |
| N304 | A | 0.09691001<br>3 | C(C(=O)O[C@H]1[C@@H]([C@@H](COC(CC2(C=C<br>C(C=C2)=O)O)=O)O[C@H]([C@@H]1OC(Cc1cccc<br>1)=O)OC(CC1(C=CC(C=C1)=O)O)=O)O)c1ccc(cc1)<br>O |
| N306 | A | 0.09691001<br>3 | C1CCN[C@H]2[C@@]3(CCC=CCCCCN4CC[C@@<br>H](C(=C3)[C@@H]3c5c(CCN3CCc3c6c(ccn3)c3cccc<br>c3[nH]6)c3cccc3[nH]5)[C@]2(CCC=CC1)C4)O         |
| N308 | A | 0.09691001<br>3 | CC(=O)OC1CC(C)(C)C2(CCC3C(Cc4c(cco4)C3=O)<br>C2(C)C1OC(C)=O)O                                                                         |
| N309 | A | 0.09691001<br>3 | CC(=O)OC1CCC(C)(C)C2(CC3C4C(C(=O)O3)c3cco<br>c3CC4C12C)O                                                                              |
| N307 | A | 0.09691001<br>3 | CC(C)=CCc1cc(C(C=Cc2ccc(cc2)O)=O)c(c(CC=C(C)<br>C)c1O)O                                                                               |
| N310 | A | 0.09691001<br>3 | CC=C(C)C(=O)OC1CC2(C)C(C=C(C(CO)=CC3C1C(<br>=C)C(=O)O3)O2)=O                                                                          |
| N311 | A | 0.09691001<br>3 | CC1CC2C(C)(CCC3(C)C4=CC=C5C(=CC(C(=C5C)<br>O)=O)C4(C)CCC23C)C(C1=O)O                                                                  |
| N313 | A | 0.09691001<br>3 | CN1C2=CC(c3cccc3NC2c2cccc12)=O                                                                                                        |
| N312 | A | 0.09691001<br>3 | CN1C2C(=C(c3cccc13)n1c3cccc3c3c1cc1cccc1n<br>3)c1cccc1N=2                                                                             |
| N314 | A | 0.04963514<br>6 | CN1CCc2cc(c(c3c2C1Cc1ccc(cc1)O)c1c2C(Cc4ccc(c<br>c4)O3)N(C)CCc2cc(c1O)OC)O)OC                                                         |
| N315 | A | 0.04575749<br>1 | C[C@@]12CCC[C@]3(C)c4cc5C(C6=C(C(c5cc4C([<br>C@]([C@H]23)(O)OC1)=O)=O)S(CCN6)(=O)=O)=O                                                |
| N316 | A | 0.04575749<br>1 | COc1cc2c(CC[n+]3cc4cc(c(cc4cc23)OC)OC)cc1O                                                                                            |
| N317 | A | 0.03621217<br>3 | CC(C)CC(=O)O[C@@H]1C[C@@](C)(C(C=C[C@H]<br>(C)C[C@@H]2[C@@H]1C(=C)C(=O)O2)=O)O                                                        |
| N318 | A | 0.02355206<br>5 | CC(C)C(=O)OC1CC(C)(C=CC(C(C)=CC2C1C(=C)C(<br>=O)O2)=O)O                                                                               |
| N319 | A | 0.02289858<br>2 | CCCCC=CC(=O)OC1CC2C(CCCCC(CCC)O)CCC<br>C2NC1C                                                                                         |
| N320 | A | 0.01772876<br>7 | [H][C@]1(C(c2c(cc(cc2O[C@@H]1c1ccc(cc1)O)O)<br>=O)[C@@]1([H])C(c2c(cc(cc2O[C@@H]1c1ccc(cc1)<br>OC)O)O)=O                              |
| N321 | A | 0.01322826<br>6 | CC(C)=CCC(=O)OC1CC2C(CC=C3CC(CCC23C)N(<br>C)C)C2CCC3CN(C)CC123                                                                        |
| N322 | A | 0.01308409<br>8 | COc1ccc(cc1)C1C(C2C(c3ccc(cc3)O)Oc3cc(cc(c3C2<br>=O)O)O)C(c2c(cc(cc2O1)O)O)=O                                                         |
| N323 | A | 0.00877392<br>4 | [H][C@]12CC[C@]3(C)[C@]([H])(CC[C@]4([H])[C@<br>@]5([H])[C@@H](CC[C@@]5(CC[C@@]34C)C(O)=<br>O)C(C)=C)[C@@]2(C)CC[C@@H](C1(C)C)OC(C)C= |

|      |   |             |                                                                                                                  |
|------|---|-------------|------------------------------------------------------------------------------------------------------------------|
|      |   |             | Cc1ccc(c(c1)O)O                                                                                                  |
| N335 | A | 0           | [C-<br>]#[N+]C(C)(C)C[C@H]1CC(C)C2CCC(C)C3(CCC(=C<br>)C1[C@H]23)[N+]#[C-]                                        |
| N326 | A | 0           | [H][C@@]1(C(c2c(cc(cc2O[C@@H]1c1ccc(cc1)O)O<br>O)=O)[C@@]1([H])C(c2c(cc(cc2O[C@@H]1c1ccc(cc<br>1)OC)O)O)=O       |
| N327 | A | 0           | [H]C1C([H])C(C)(C)C2(C(C(C3([H])C(=C([H])C(=O)O<br>C)c4ccoc4CC3([H])C2(C)C1=O)OC(C)=O)OC(C)=O)<br>O              |
| N328 | A | 0           | [H]C1C([H])C(C)(C)C2(C(C(C3([H])C(c4ccoc4CC3([H<br>])C2(C)C1=O)=O)OC(C)=O)OC(C)=O)O                              |
| N331 | A | 0           | C(C(=O)O[C@@H]1[C@H]([C@@H]([C@@H](COC(<br>CC2(C=CC(C=C2)=O)O)=O)O[C@H]1OC(CC1(C=C<br>C(C=C1)=O)O)=O)O)c1cccc1   |
| N332 | A | 0           | C1=C(c2c[nH]c3ccc(cc23)O)NC(C1=C1C(Nc2cccc1<br>2)=O)=O                                                           |
| N333 | A | 0           | C1C(C(c2ccc(c(c2)OC(c2cc(c(c(c2)O)O)O)=O)O)Oc2<br>cc(cc(c12)O)O)O                                                |
| N329 | A | 0           | CC(=C)C[C@@H]1C[C@H](C)[C@H]2CC[C@](C)(C<br>#N)[C@H]3CCC(=C)[C@@H]1[C@H]23                                       |
| N330 | A | 0           | CC(C)=CC1C[C@H](C)[C@H]2CC[C@H](C)[C@]3(<br>CC[C@H](C)C=1[C@H]23)C#N                                             |
| N334 | A | 0           | CC1=CC(C(C2(C)C1CC1C34COC(C23))(C(C(=C)C4(<br>C(C(=O)O1)O)O)O)O)OC(C1C(C(C(C(O1)OC1(C<br>O)C(C(C(CO)O1)O)O)O)O)O |
| N336 | A | 0.002710169 | -<br>COc1ccc(cc1)C1C(C2C(c3ccc(cc3)O)Oc3cc(cc(c3C2<br>=O)O)O)C(c2c(cc(cc2O1)O)O)=O                               |
| N337 | A | 0.012281092 | -<br>CC1C2CC3C45COC(C5C(C(=O)O3)O)(C(C(C4C2(C<br>)CC(C=1O)=O)O)O)C(=O)OC                                         |
| N338 | A | 0.01466708  | -<br>COc1cc2c(CC[n+]3cc4c(ccc(c4OC)OC)cc23)cc1O                                                                  |
| N339 | A | 0.015046813 | -<br>CCCC(=O)O[C@H]1[C@H]2c3cc4c(cc3CN3CCC(=C<br>[C@@H]1O)[C@H]23)OCO4                                           |
| N340 | A | 0.017033339 | -<br>CC(C)=CCC1=C(c2cc(c(cc2O)O)O)Oc2c(CC=C(C)C)<br>c3c(C=CC(C)(C)O3)c(c2C1=O)O                                  |
| N341 | A | 0.017033339 | -<br>CC1C2CCC3C4CC=C5CC(CCC5(C)C4CCC23CN1C<br>)N(C)C                                                             |
| N342 | A | 0.028421338 | -<br>COc1cnc2c3cccc3C(c3c2c1ccn3)=O                                                                              |

|      |   |                 |                                                                                                                            |
|------|---|-----------------|----------------------------------------------------------------------------------------------------------------------------|
| N343 | A | 0.04139268<br>5 | -<br>[H]N1CCS(C2=C1C(c1cc3c(cc1C2=O)C(c1c2c(co1)C(CC[C@]23C)=O)=O)=O)(=O)=O                                                |
| N344 | A | 0.04139268<br>5 | -<br>CC(C)=CCc1c(c2C(c3ccc(c(c3Oc2c(c1O)C(C)(C)C=C)O)O)=O)O                                                                |
| N346 | A | 0.04139268<br>5 | -<br>CC12CCc3coc(C(c4cc5C(C=CC(c5cc14)=O)=O)=O)c23                                                                         |
| N345 | A | 0.04139268<br>5 | -<br>CCC=C(C)C=CCCC1(C[C@H](C)[C@H](C(C)C(=O)OC)OO)OC                                                                      |
| N347 | A | 0.04139268<br>5 | -<br>CN1CCc2cc3c4cc2C1Cc1ccc(c(c1)Oc1ccc(CC2c5c(CCN2C)cc(c(c5O4)O3)OC)cc1)O                                                |
| N348 | A | 0.04921802<br>3 | -<br>CC(C)=CCCC1=C(c2cc(c(cc2O)O)O)Oc2c(cc(CCC=C(C)C)c(c2CCC=C(C)C)O)C1=O                                                  |
| N349 | A | 0.05307844<br>4 | -<br>CC(C)=CCC(=O)OC1CC2C(CC=C3CC(CCC23C)N(C)C)C2CCC3CN(C)CC123                                                            |
| N350 | A | 0.05690485<br>1 | -<br>CN1CCc2cc(c3cc2C1Cc1ccc(c(c1)c1cc(CC2c4c(CC N2C)cc(c(c4O3)OC)OC)ccc1OC)O)OC                                           |
| N351 | A | -0.0651105      | -<br>COc1ccc2c3ccnc(CCC(O)=O)c3[nH]c2c1                                                                                    |
| N352 | A | 0.07918124<br>6 | -<br>C1C([C@@H](c2ccc(c(c2)O)O)Oc2cc(cc(c12)OC(c1cc(c(c1)O)O)O)=O)O)O                                                      |
| N353 | A | 0.07918124<br>6 | -<br>CC(C)(C=C)c1c2c(C=CC(C)(C)O2)c(c2C(c3ccc(c(c3Oc12)O)O)=O)O                                                            |
| N354 | A | 0.07918124<br>6 | -<br>CC(C)CC(=O)O[C@H]1C(=O)O[C@@H]2C[C@H]3C(C)=CC([C@H]([C@]3(C)[C@H]3[C@H]([C@@H]([C@]4(C(=O)OC)[C@H]1[C@]23CO4)O)O)O)=O |
| N355 | A | 0.07918124<br>6 | -<br>COc1ccc(cc1O)C1=COc2cc(ccc2C1=O)O                                                                                     |
| N19  | A | 0.08278537      | -<br>CC(=O)OC1CC2C(C)(C)C(C=CC2(C)C2CCC3(C)C(CC=C3C12C)c1ccoc1)=O                                                          |
| N356 | A | 0.10587353<br>5 | -<br>CC1Cc2c(C(C)N1)c(cc(c2c1ccc(c2c(cc(C)cc12)OC)O)OC)OC                                                                  |
| N357 | A | 0.10720997      | -<br>[H][C@]1(Cc2cc(C)c(c(c2)Oc2ccc(C[C@]3([H])c4cc(c(cc4CCN3C)OC)O)cc2)OC)c2cc(c(cc2CCN1C)OC)O                            |
| N358 | A | 0.11394335      | -<br>[H][C@@]12c3c(cc(c(c3O)O)O)C(=O)O[C@@]1([H])[C@@H]([C@H]([C@H](CO)O2)O)OC(c1cc(c(c1)O                                 |

|      |   |                 |                                                                                   |
|------|---|-----------------|-----------------------------------------------------------------------------------|
|      |   | 2               | C)O)O)=O                                                                          |
| N362 | A | 0.11394335<br>2 | CC(C)=CCc1c(c(CC=C(C)C)c2c(C(c3cc(c(c3O2)O)OC)OC)=O)c1O)O                         |
| N359 | A | 0.11394335<br>2 | CC(C)=CCc1c(cc2c(C(C3=C(C=C(C(C3(CC=C(C)C)CC=C(C)C)=O)O)O2)=O)c1O)O               |
| N360 | A | 0.11394335<br>2 | CC(C)=CCCC(C)=CCc1c(cc(c2C(c3cc(ccc3O)c12)O)=O)O)O                                |
| N361 | A | 0.11394335<br>2 | Cc1cc(c2c(ccc(c3ccc4cc(C)nc(C)c4c3O)c2c1)OC)OC                                    |
| N363 | A | 0.11727129<br>6 | CC(C)=CCc1c(cc(c2C(CC(c3c(cc(cc3OC)OC)OC)OC)Oc12)=O)O)O                           |
| N364 | A | 0.11727129<br>6 | CC(C)=CCCC(C)=CCc1c2c(C=CC(C)(C)O2)c(c2C(C3CC4c5c(C=3Oc12)c(cc(c5OC4(C)C)O)O)=O)O |
| N365 | A | 0.11864191<br>5 | CC(C)(C=C)C1=Cc2c(c3C=CC(C)(C)Oc3c(c2OC1=O)C(C)(C)C=C)O                           |
| N366 | A | 0.11920247<br>3 | CN1CCc2cc(c(cc2C1Cc1ccc(cc1)Oc1c2CC3c4c(CC N3C)c(c(c4c2cc(c1O)OC)OC)OC)OC)OC)O    |
| N367 | A | 0.11997616<br>7 | CC1CC(C=C(C)C)OC12CCC1(C)CC3C(C(=CCC12)C=O)C(CC3(C)O)=O                           |
| N368 | A | 0.12065246<br>7 | CC1Cc2c(c3ccc(c4c(cc(C)cc34)O)OC)c(cc(c2C(C)N1C)OC)O                              |
| N369 | A | 0.12595190<br>7 | CC=C1CN(C)C2Cc3c4cccc4[nH]c3C(CC1C2C(=O)OC)=O                                     |
| N370 | A | 0.13159557<br>2 | CCC=CC(CC)CCCC1(CC)CC(CC)C(CC(=O)OC)OO1                                           |
| N371 | A | 0.13672056<br>7 | CC(C)=CCCC(C)=CCCC(C)=CCc1cc(ccc1O)O                                              |
| N373 | A | 0.14612803<br>6 | C=CC12CC(C3C(C2C(=C)C(=O)OC1)OC(C3=C)=O)OC(C(=C)CO)=O                             |
| N372 | A | 0.14612803<br>6 | CC(C)=CCc1c(c2C(c3ccc(c(c3Oc2c2c1O[C@@H](C)C2(C)C)O)O)=O)O                        |

|      |   |                 |                                                                                                                               |
|------|---|-----------------|-------------------------------------------------------------------------------------------------------------------------------|
| N374 | A | 0.14612803<br>6 | -<br>CC(C)c1cc2C(CC3C(C)(C)CCCC3(C)c2cc1O)=O                                                                                  |
| N375 | A | 0.14612803<br>6 | -<br>CCCCCCCCC(C#CC#CC(C=C)OC(C)=O)O                                                                                          |
| N376 | A | 0.14612803<br>6 | -<br>CCCCCCCCC(C#CC#CC(C=C)OC(C)=O)O                                                                                          |
| N377 | A | 0.14612803<br>6 | -<br>CNCCc1cc(c(c(c1)[Br])OCCNC(C1CC2(CC(=C(C(=CO2)[Br])OC)[Br])ON=1)=O)[Br]                                                  |
| N378 | A | 0.14612803<br>6 | -<br>COc1ccc(cc1)C1=CC(c2c(cc(c(c3cc(ccc3OC)C3=CC(c4c(cc(cc4O3)OC)O)=O)c2O1)O)O)=O                                            |
| N379 | A | 0.14894373<br>7 | -<br>CC1CC(C)OC(CC(c2ccc(cc2)O)NC(C(Cc2c3cccc3[nH]c2[Br])N(C)C(C(C)NC(C(C)CC(C)=C1)=O)=O)=O)=O                                |
| N380 | A | 0.15031529<br>9 | -<br>CC=C1CN2C3CC1C(COC(c1cc(c(c(c1)OC)OC)OC)=O)(C(=O)OC)C14CC2OC34N(C)c2cc(c(cc12)OC)OC                                      |
| N381 | A | 0.16774337      | -<br>CCC1CC2CC3(C1N(CCc1c4cccc4[nH]c13)C2)C(=O)OC                                                                             |
| N382 | A | 0.17377635<br>3 | -<br>CC(=O)OC1CC2C(C)(C)C(C=CC2(C)C2CCC3(C)C(c4ccoc4)OC(C4C3(C12C)O4)=O)=O                                                    |
| N384 | A | 0.17609125<br>9 | -<br>C(C(=O)O[C@@H]1[C@@H]([C@@H](COC(CC2(C=C(C(C=C2)=O)O)=O)O[C@@H]([C@@H]1OC(Cc1cccc1)=O)OC(CC1(C=CC(C=C1)=O)O)=O)O)c1cccc1 |
| N383 | A | 0.17609125<br>9 | -<br>C[C@@H]1C[C@@H]2C[C@@H](C)[C@@](C)(C#N)[C@@H]3CC[C@@H]4[C@@H]([C@@H]23)[C@@H]1CC[C@@]4(C)NC=O                            |
| N395 | A | 0.17609125<br>9 | -<br>CC(=C)C1CCC2(CCC3(C)C(C)(CCC4C3(C)CCC3C(C)(C)C(C[C@@]34C)O)OC(C=Cc3ccc(cc3)O)=O)C12)C(O)=O                               |
| N396 | A | 0.17609125<br>9 | -<br>CC(C)[C@]12CC[C@](C)(C3=C([C@H](C)CC3=O)[C@H]1O)OO2                                                                      |
| N394 | A | 0.17609125<br>9 | -<br>CC(C)=CCc1c(cc2cc3CC(C)(CC(c3c(c2c1O)O)=O)O)OC                                                                           |
| N387 | A | 0.17609125<br>9 | -<br>Cc1c2c(ccn1)c1cccc1[nH]2                                                                                                 |
| N386 | A | 0.17609125      | -<br>CC1CCC(C(=C)CC2C(C(C=1)O)C(=C)C(=O)O2)O                                                                                  |



|      |   |                 |                                                                                   |
|------|---|-----------------|-----------------------------------------------------------------------------------|
|      |   | 9               |                                                                                   |
| N385 | A | 0.17609125<br>9 | CC1CCC(C(C)=CC2C(C(C=1)O)C(=C)C(=O)O2)O                                           |
| N391 | A | 0.17609125<br>9 | CN1CCc2cc(c(c3c2C1Cc1ccc(cc1)Oc1c2C(Cc4ccc(c<br>c4)O3)N(C)CCc2cc(c1OC)OC)OC)OC    |
| N388 | A | 0.17609125<br>9 | CN1CCc2cc(c(cc2C1Cc1ccc(c(c1)O)OC)Oc1cc(c(cc1<br>CC1c2cc(c(cc2CCN1C)OC)O)OC)OC)OC |
| N389 | A | 0.17609125<br>9 | CN1CCc2cc(c(cc2C1Cc1ccc(cc1)Oc1cc(CC2c3cc(c(<br>cc3CCN2C)OC)OC)ccc1OC)O)OC        |
| N392 | A | 0.17609125<br>9 | CN1CCc2cc(c3c(c2C1Cc1ccc(c(c1)Oc1cc2c(ccnc2C<br>c2ccc(CO3)cc2)cc1OC)O)O)OC        |
| N393 | A | 0.17609125<br>9 | CN1CCc2cc(c3c(c2C1Cc1ccc(c(c1)Oc1cc2c(ccnc2C<br>c2ccc(CO3)cc2)cc1OC)OC)O)OC       |
| N390 | A | 0.17609125<br>9 | CN1CCc2cc(c3cc2C1Cc1ccc(c(c1)Oc1ccc(CC2c4c(C<br>CN2C)cc(c(c4O3)OC)OC)cc1)O)OC     |
| N9   | A | 0.17831804<br>7 | C[C@H]([C@H]1[C@H](C=C[C@H]2[C@H]([C@@H<br>](C=C)O)O2)O1)O                        |
| N397 | A | 0.18184358<br>8 | COc1ccc2CC3c4cc5c(cc4CCN=3)Oc3c(cc4CCN[C@<br>@H](Cc6ccc(cc6)Oc1c2)c4c3O5)OC       |
| N398 | A | 0.18523809<br>4 | CC(C)(C=C)c1c2c(C=CC(=O)O2)c(c2C=CC(C)(C)Oc<br>12)OC                              |
| N399 | A | 0.18752072<br>1 | CC(C)[C@@H]1CCC(C)=CCC[C@](C)(C=C1)O                                              |
| N400 | A | 0.18819006<br>5 | CC(c1c(cc(c2c(C)cc(c3C(c4c(ccc4O)C(c23)=O)=O<br>)O)c1O)O)OC)=O                    |
| N401 | A | 0.19324602<br>4 | CCC(CC1(CC)C=C(CC)C(=CC(=O)OC)O1)C=CC(C)<br>=O                                    |
| N402 | A | 0.19514863<br>6 | CCCC(=O)O[C@H]1C=C2CCN3Cc4cc5c(cc4[C@@<br>H]([C@@H]23)[C@@H]1OC(CCC)=O)OCO5       |
| N403 | A | 0.19527436<br>5 | C[C@@]12CC[C@@]3(C[C@@]2(CCC2[C@@]14C<br>CC[C@@]2(C)C(=O)O4)C(C3=C)=O)OC          |

|      |   |                 |                                                                                                                      |
|------|---|-----------------|----------------------------------------------------------------------------------------------------------------------|
| N404 | A | 0.20116272<br>2 | -<br>CC1C(CC2C=1C1(C)C(CC(O)=O)C3(C)C(C(C1O2)O)<br>)C(C)(C=CC3=O)C(=O)OC)c1ccoc1                                     |
| N405 | A | 0.20411998<br>3 | -<br>[H][C@@]12C3CCC1=C[C@@H]([C@H]([C@@]2([<br>H])c1cc2c(cc1C3)OCO2)OC(C[C@H](C)O)=O)O                              |
| N406 | A | 0.20411998<br>3 | -<br>CC(=O)OC(C)(C)C=CC(C(C)(C1C(CC2(C)C3CC=C4<br>C(CC(C(C4(C)C)=O)O)C3(C)C(CC12C)=O)O)O)=O                          |
| N407 | A | 0.20411998<br>3 | -<br>CC(=O)OC1C2C(C(=O)OC)c3ccoc3CC2C2(C)C(CC<br>C(C)(C)C2(C1O)O)=O                                                  |
| N409 | A | 0.20411998<br>3 | -<br>CC1(CC(c2c(C1)cc1cc(c3C=CC(C)(C)Oc3c1c2O)OC<br>)=O)O                                                            |
| N408 | A | 0.20411998<br>3 | -<br>COc1cc2C3Cc4cc(c(cc4CN3CCc2cc1O)OC)OC                                                                           |
| N410 | A | 0.20597729<br>9 | -<br>C[C@@H](CC(=O)O)[C@H]1[C@H]2c3cc4c(cc3CN3<br>CCC(=C[C@@H]1O)[C@H]23)OCO4)O                                      |
| N411 | A | 0.21218760<br>4 | -<br>CC(C)[C@@H]1CCC(=C)[C@@H](CC[C@@](C)(C=C<br>C1)O)O                                                              |
| N412 | A | 0.21218760<br>4 | -<br>CN1CCc2cc(c3c4c2C1Cc1ccc(cc1)Oc1cc(CC2c5cc(c<br>(cc5CCN=2)O3)O4)ccc1O)OC                                        |
| N17  | A | 0.21748394<br>4 | -<br>C(c1c2c(cc[nH]2)c2cccc2n1)n1cnc2c(N)ncnc12                                                                      |
| N413 | A | 0.21757767<br>5 | -<br>CC(=O)OC1CC2C(C)(C)C(C=CC2(C)C2CCC3(C)C(<br>C(C4C3(C12C)O4)=O)c1ccoc1)=O                                        |
| N414 | A | 0.22021773<br>8 | -<br>C[C@@H](CC(=O)O)[C@H]1[C@H]2c3cc4c(cc3CN3<br>CCC(=C[C@@H]1O)[C@H]23)OCO4)O                                      |
| N415 | A | 0.22027095<br>3 | -<br>CC1Cc2cc(c(c3c(C)cc4cccc(c4c3O)OC)c(c2C(C)N1C<br>)OC)OC                                                         |
| N416 | A | 0.22530928<br>2 | -<br>CCC=C(C)CCC=C(C)Oc1cc2Cc3cc(C)cc(c3C(c2c(c1<br>)O)=O)O                                                          |
| N417 | A | 0.23044892<br>1 | -<br>[H]C1C([H])[C@]2(C(C)(C)C([H])[C@H](CC(C)=O)C(<br>=C([H])OC(C)=O)[C@]2(C)[C@@]2([H])Cc3c(cco3)C<br>(=C)C12[H])O |
| N420 | A | -               | -<br>CC(C)=CCCC(C)=CCc1c(cc2cc3CC(C)(CC(c3c(c2c1                                                                     |

|      |   |                      |                                                                                                                  |
|------|---|----------------------|------------------------------------------------------------------------------------------------------------------|
|      |   | 0.23044892<br>1      | O)O)=O)O)OC                                                                                                      |
| N418 | A | -<br>0.23044892<br>1 | CCC(C)C(=O)OC1(c2cccc(c2C(c2c1cc(c(C(=O)OC)c2C)O)=O)O)c1ccc2C(c3cc(c(C(=O)OC)c(C)c3C(c2c1O)=O)O)=O               |
| N419 | A | -<br>0.23044892<br>1 | COc1cc(ccc1O)C1C(CO)Oc2ccc(cc2O1)C1=C(C(c2c(cc(cc2O1)O)O)=O)O                                                    |
| N421 | A | -<br>0.23496823<br>1 | CC1Cc2cc(c(c3c(C)cc4cccc(c4c3O)OC)c(c2C(C)N1C)OC)O                                                               |
| N422 | A | -<br>0.23597600<br>9 | [H]c1cccc1C=Cc1cc(c2c(c1)OC(C)(C)[C@@]1([H])CC[C@H](C)C[C@@]12[H])O                                              |
| N423 | A | -<br>0.23712198<br>3 | CC1Cc2cc(c(c3c(C)cc4cccc(c4c3O)OC)c(c2C(C)=N1)OC)OC                                                              |
| N20  | A | -<br>0.24054924<br>8 | CC(=O)OC1CC(C(C)(C)C2CC(C3(C)C(CCC4(C)C(C)C=C34)C3CC(O)OC3)C12C)OC(C)=O)=O                                       |
| N424 | A | -<br>0.24211405<br>3 | [H][C@@]1(C[C@@H](C)CC[C@]1([H])C(C)C)c1c(c(C=Cc2cccc2O)cc1O)O                                                   |
| N425 | A | -<br>0.24667323<br>6 | CC(=CCO)C1CC2C(C)(C)C(C=CC2(C)OO1)=O                                                                             |
| N426 | A | -<br>0.25527250<br>5 | [H][C@](CO)(C#CC#CC#CC#CC#CC)O                                                                                   |
| N427 | A | -<br>0.25527250<br>5 | C1CCN2CCC3C(=CC(CCC=CC1)(C1C3(CC3C=CCCCN13)C2)O)c1c2c(ccn1)c1cccc1[nH]2                                          |
| N428 | A | -<br>0.25527250<br>5 | CC(C)=CCC1=C(C(CC=C(C)C)(CC=C(C)C)c2cc3c(c(C)cc(c3c(c2C1=O)O)O)O)O                                               |
| N429 | A | -<br>0.25731821<br>4 | c1ccc2c(c1)C(c1c3c(ccn1)ccnc23)=O                                                                                |
| N430 | A | -<br>0.26481782<br>3 | CC1=C(C(C=C(C1=O)OC)=O)[Cl]                                                                                      |
| N431 | A | -<br>0.26520097<br>3 | C[C@@H]1CC[C@@]2(CC[C@]3(C)C(=CC[C@@H]4[C@@]5(C)C[C@H]([C@@H](C(C)(C)[C@@H]5CC[C@@]34C)O)[C@@H]2[C@]1(C)O)C(O)=O |
| N432 | A | -<br>0.27067883      | C[C@]12CC[C@H]3C(=C)C(=O)O[C@@H]3[C@H]2C(=C)C(C=C1)=O                                                            |

|      |   |                 |                                                                                                        |
|------|---|-----------------|--------------------------------------------------------------------------------------------------------|
|      |   | 6               |                                                                                                        |
| N434 | A | 0.28647836<br>2 | CC(=O)OC1CC2C(C)(C)C(C=CC2(C)C2CCC3(C)C(CC=C3C12C)C1CC(C2C(C)(C)O2)OC1OC(C)=O)=O                       |
| N435 | A | 0.29666519      | CC(C)=CCOc1cc2Cc3cc(C)cc(c3C(c2c(c1)O)=O)O                                                             |
| N3   | A | 0.30102999<br>6 | C[C@@]12C[C@H]3[C@H](C[C@H]4[C@@](C)(CC[C@H]1O2)O4)C(=C)C(=O)O3                                        |
| N436 | A | 0.30102999<br>6 | C1=C(C(c2c(cc(cc2O1)O)O)=O)c1ccc(cc1)O                                                                 |
| N437 | A | 0.30102999<br>6 | C1CN=C2C3=C(C(c4c2c1c[nH]4)=O)NCCC31C=C(C(C(=C1)[Br])=O)[Br]                                           |
| N438 | A | 0.30102999<br>6 | CC(=O)O[C@H]1[C@H](C(C)(C)[C@@]2(CC[C@H]3C(c4ccoc4C[C@@H]3[C@@]2(C)[C@H]1OC(C)=O)=O)O)OC(C)=O          |
| N439 | A | 0.30102999<br>6 | CC1=CC(C(C2(C)C1CC1C34COC(C23)(C(C(=C)C4(C(C(=O)O1)O)O)O)O)O)O                                         |
| N443 | A | 0.30102999<br>6 | CC12CCC(C)(CC2C2(C)CCC3=C(CCC4C(C)(C)C(CC34C)O)C2(C)CC1)C(O)=O                                         |
| N442 | A | 0.30102999<br>6 | Cc1cc(c2c(ccc(c3c(cc4C[C@H](C)N(C)[C@H](C)c4c3OC)OC)c2c1)OC)OC                                         |
| N440 | A | 0.30102999<br>6 | CCCCC(C)CC(C)C(N1CCCC1C(=O)OC(C(C)CC)C(=O)OC(C(C)CC)C(O)=O)=O                                          |
| N441 | A | 0.30102999<br>6 | COc1cc(c2C(C=C(c3ccc(c(c3)c3c(cc(c4C(C=C(c5ccc(cc5)O)Oc34)=O)O)O)OC)Oc2c1)=O)O                         |
| N444 | A | 0.30338390<br>1 | COC(c1cc(c(c(c1)O)O)O)=O                                                                               |
| N445 | A | 0.30701110<br>6 | C[C@@]12CC[C@@]3(C[C@@]2(CCC2[C@@]14CC[C@@]2(C)C(=O)O4)C(C3=C)=O)O                                     |
| N446 | A | 0.30963016<br>7 | COc1ccc(cc1OC)C(CNC(C=Cc1cccc1)=O)OC(C=Cc1cccc1)=O                                                     |
| N447 | A | 0.30983229<br>4 | CC(C)C1C(N(C)C(Cc2cccc2)C(=O)OC(C(C)C)C(N(C)C(Cc2cccc2)C(=O)OC(C(C)C)C(N(C)C(Cc2cccc2)C(=O)O1)=O)=O)=O |
| N448 | A | -               | CC(C)=CCCC(C)=CCc1c(CC=C(C)C)c2C(c3c(cc(cc3                                                            |

|      |   |                      |                                                                                                     |
|------|---|----------------------|-----------------------------------------------------------------------------------------------------|
|      |   | 0.31523866<br>6      | Oc2c(c1O)O)O)=O                                                                                     |
| N449 | A | -<br>0.31979978<br>3 | C1CN2Cc3cc4c(cc3C3C2C1=CC(C3O)O)OCO4                                                                |
| N450 | A | -<br>0.32221929<br>5 | [H]C1CC([H])[C@]2(C)[C@@]3([H])Cc4c(cco4)[C@]([H])(C)C3([H])[C@H](C([H])[C@]2(C1(C)C)O)O            |
| N452 | A | -<br>0.32221929<br>5 | CC(=C)C(CC=C(C)C)Cc1c(cc(c2C(C=C(c3ccc(cc3O)C)O)Oc12)=O)O)O                                         |
| N451 | A | -<br>0.32221929<br>5 | CC(=C)C(CC=C(C)C)Cc1c(cc(c2C(CC(c3ccc(cc3OC)O)Oc12)=O)O)O                                           |
| N453 | A | -<br>0.32221929<br>5 | COc1cc(ccc1O)[C@@H]([C@H](CO)Oc1c(cc(CCCO)cc1OC)OC)O[C@H]1[C@@H]([C@@H](C(C(CO)O)1)O)O)O            |
| N454 | A | -<br>0.32837960<br>3 | C[C@H]1[C@H]([C@H](C(C(Oc2cc3c(C(CC(c4ccc(c(c4)O)O)O3)=O)c(c2O)O)O1)O)O)O                           |
| N455 | A | -<br>0.33645973<br>4 | CCCCCCCCC(C#CC#CC(C=C)OC(C)=O)O                                                                     |
| N15  | A | -<br>0.33683431<br>2 | C1C(O)OCC2=C1C(c1cccc1C2=O)=O                                                                       |
| N456 | A | -<br>0.34242268<br>1 | CC(=C)C(Cc1cc(C(C=Cc2ccc(c(CC=C(C)C)c2)O)=O)c(cc1O)O)O                                              |
| N459 | A | -<br>0.34242268<br>1 | CC(=O)OCCCCCCCCCCC(C#CC#CC(C=C)OC(C)=O)O                                                            |
| N458 | A | -<br>0.34242268<br>1 | CC(C)(CCCCCCCCCCC(C#CC#CC(C=C)OC(C)=O)O)=O                                                          |
| N457 | A | -<br>0.34242268<br>1 | CC(C)=CCC1CC23CC(CC=C(C)C)C(C)(C)OC2=C(C(c2ccc(c(c2)O)O)=O)C(C(CC=C(C)C)(C3=O)C1(C)C)=O             |
| N460 | A | -<br>0.34242268<br>1 | CC(C)C[C@@H]([C@@H]1Cc2cccc(c2C(=O)O1)O)NC([C@H]([C@@H]1[C@@H]2CC(N[C@](C)([C@@](C)(O)O1)N2)=O)O)=O |
| N461 | A | -<br>0.34830486<br>3 | [H]C(=C)C1=CCCC(CO)=C[C@H]2[C@H](C(=C)C(=O)O2)[C@H](CC(C(C)CC)=O)[C@@H]1OC(C)=O                     |
| N462 | A | -<br>0.35554216      | CC1Cc2c(c3ccc(c4c(cc(C)cc34)O)OC)c(cc(c2C(C)N1C)OC)O                                                |

|      |   |                 |                                                                                                                   |
|------|---|-----------------|-------------------------------------------------------------------------------------------------------------------|
|      |   | 3               |                                                                                                                   |
| N463 | A | 0.35823564<br>2 | CC=C1CN2CCC34C(C2CC1C4(COC(C)=O)C(=O)O<br>C)=Nc1cccc13                                                            |
| N464 | A | 0.36172783<br>6 | CC1CC2=CC(C=C3C2=C(C=C(C)O3)O1)=O                                                                                 |
| N465 | A | 0.36172783<br>6 | CCC(C)C1c2nc(cs2)C(NC(C)C2=NC(C(C)O2)C(NC(C(C)C)c2nc(co2)C(N1)=O)=O)=O                                            |
| N466 | A | 0.36604549<br>3 | COC1CC2C3(C=C1)C(CN2Cc1cc2c(cc13)OCO2)O                                                                           |
| N467 | A | 0.37166461<br>9 | CC=C1CN2CCC34c5cc(ccc5N(C)C45C2CC1C3(CO<br>5)C(=O)OC)O                                                            |
| N468 | A | 0.37474834<br>6 | C1Oc2cc3ccnc4C(c5cccc5c(c2O1)c34)=O                                                                               |
| N470 | A | 0.38021124<br>2 | CC(=C)C(CC=C(C)C)Cc1c(cc(c2C(C=C(c3ccc(cc3O<br>C)O)Oc12)=O)OC)O                                                   |
| N469 | A | 0.38021124<br>2 | CC(=C)C(CC=C(C)C)Cc1c(cc(c2C(CC(c3ccc(cc3OC<br>O)Oc12)=O)OC)O                                                     |
| N472 | A | 0.38021124<br>2 | CC(C1CCC2C3CCC4CC(CCC4(C)C3CCC12C)N(C)<br>C)N(C)C                                                                 |
| N471 | A | 0.38021124<br>2 | COc1cc(c(C=Cc2cccc2)=O)c(c1OC)O)O                                                                                 |
| N473 | A | 0.39748274<br>7 | [H]C(C1CCC(COC(C)=O)=C[C@H]2C(C(=C)C(=O)O<br>2)[C@H](CC=1)O)=O                                                    |
| N475 | A | 0.39794000<br>9 | CC1C=C(C2C(C=CC=C2O)C=1c1c(cc(c2c1C[C@H](<br>C)N[C@H]2C)OC)O)OC                                                   |
| N476 | A | 0.40015858<br>3 | CC(C)c1c2CC[C@H]3C(C)(C)CCC[C@]3(C)c2cc(c1<br>O)O                                                                 |
| N477 | A | 0.40312052<br>1 | CCC=C(C)CCC=C(C)c1c(cc2C(=C3c4cc(C)cc(c4C(c<br>4c3cc(c(C(C)=CCCC(C)=CCC)c4O)O)=O)O)c3cc(C)<br>cc(c3C(c2c1O)=O)O)O |
| N478 | A | 0.40717350<br>9 | CC=C1CN2C3CC1C(CO)(C2Cc1c2cccc2[nH]c13)C(<br>=O)OC                                                                |

|      |   |                 |                                                                                       |
|------|---|-----------------|---------------------------------------------------------------------------------------|
| N479 | A | 0.40717350<br>9 | -<br>CC1C2CN3CCc4c5ccccc5[nH]c4C3CC2C(=CO1)C(=O)OC                                    |
| N480 | A | 0.41217059<br>6 | -<br>CC1C2CN3C=CC4C(=C3CC2C(=CO1)C(=O)OC)N=c1ccccc1=4                                 |
| N481 | A | 0.41497334<br>8 | -<br>[H]c1c2c(C(c3c(CCC=C(C)C)ccc(c3N2C)O)=O)c(c(CCC=C(C)C)c1O)O                      |
| N483 | A | 0.41497334<br>8 | -<br>CC(=C)C(CC=C(C)C)Cc1c(cc(c2C(C=C(c3ccc(cc3O)O)Oc12)=O)O)O                        |
| N482 | A | 0.41497334<br>8 | -<br>CC(=C)C(CC=C(C)C)Cc1c(cc(c2C(CC(c3ccc(cc3O)O)Oc12)=O)O)O                         |
| N484 | A | 0.41497334<br>8 | -<br>CN1C2C(=Cc3ccccc13)c1ccccc1N=2                                                   |
| N485 | A | 0.42223655<br>1 | -<br>Cc1c(cc2CCc3c(ccc(c3O)OC)C3CC(C)(C)Oc1c23)O                                      |
| N486 | A | 0.42434997      | -<br>CC=C(C)C(=O)OC1(C)C(CC2C(C3C4(C)C=CC13OO4)OC(C2=C)=O)O                           |
| N488 | A | 0.43136376<br>4 | -<br>CC(C)=CCc1c(C)cc(c2c(c3C(=CC(C(CC=C(C)C)(CC=C(C)C)c3cc12)=O)O)O)O                |
| N487 | A | 0.43136376<br>4 | -<br>CC(C)=CCOc1c2C=CC(=O)Oc2cc2c1cco2                                                |
| N489 | A | 0.44404479<br>6 | -<br>CN1CCc2cc3c(cc2C(Cc2ccc4c(c2C1)OCO4)=O)OC O3                                     |
| N490 | A | 0.44584629<br>1 | -<br>CC=C1CN2CCC34C2CC1C(=C3Nc1ccccc14)C(=O)OC                                        |
| N491 | A | 0.46239799<br>8 | -<br>[H]C(C1C[C@@H](CC(C)C)C(=O)[C@H]2C(=C)C(=O)O[C@H]2C=C(CCC=1)COC(C)=O)=O          |
| N492 | A | 0.46239799<br>8 | -<br>[H]C1C([H])C(C)(C)C2(C(C(C3([H])C(=C)c4ccoc4CC3([H])C2(C)C1=O)OC(C)=O)OC(C)=O)O  |
| N493 | A | 0.46239799<br>8 | -<br>CC(=O)OC(C)(C)C=CC(C)(C1C(CC2(C)C3CC=C4C(CC(C(C4(C)C)=O)O)C3(C)C(CC12C)=O)O)O)=O |
| N494 | A | 0.46239799      | -<br>CC(=O)OC(C)(C)C=CC(C)(C1C(CC2(C)C3CC=C4C(CC(C(C4(C)C)=O)O)C3(C)C(CC12C)=O)O)O)=O |

|      |   |            |                                                                                                             |
|------|---|------------|-------------------------------------------------------------------------------------------------------------|
|      |   | 8          |                                                                                                             |
| N495 | A | 0.46834733 | <chem>CC(C)=CCCC(C)=CCc1c(cc2C(C3c4cc(C)cc(c4C(c4c3cc(cc4O)OCC=C(C)C)=O)O)c3cc(C)cc(c3C(c2c1O)=O)O)O</chem> |
| N496 | A | 0.47129171 | <chem>CC(c1cc2C(c3ccc(c(c3C(c2o1)=O)OC)OC)=O)=O</chem>                                                      |
| N500 | A | 0.47712125 | <chem>[H][C@@]1(C(=C)C(C)=O)[C@@H]2[C@H](C(=C)C(=O)O2)[C@H](C[C@@]1(COC(C)=O)C=C)OC(C(=C)CO)=O</chem>       |
| N498 | A | 0.47712125 | <chem>[H][C@@]1(CCCCCCCCCCCCCCCC)C[C@@](C)(C(C(=O)OC)OO1</chem>                                             |
| N499 | A | 0.47712125 | <chem>[H][C@@]12C(=C)C(=O)OC[C@]2(C[C@@H]([C@@H](C(=C)C(=O)OC)[C@@H]1O)OC(C(=C)CO)=O)C=C</chem>             |
| N503 | A | 0.47712125 | <chem>C=CC12CC(C3C(C2C(=C)C(=O)OC1)OC(C3=C)=O)OC(C(=C)CO)=O</chem>                                          |
| N505 | A | 0.47712125 | <chem>CC(=O)OCC1C[C@@H]([C@H]2C(=C)C(=O)O[C@@H]2C=C(CCC=1)C=O)OC(C(=C)CO)=O</chem>                          |
| N506 | A | 0.47712125 | <chem>CC(C(=C)C1[C@@H]2C(C(=C)C(=O)O2)[C@H](C[C@@]1(COC(C)=O)C=C)OC(C(=C)CO)=O)=O</chem>                    |
| N513 | A | 0.47712125 | <chem>CC(C)=CCc1c2c(c(c3c1c(c1ccoc1n3)OC)O)OCO2</chem>                                                      |
| N514 | A | 0.47712125 | <chem>CC(C)=CCc1c2c(c(c3c1c(c1ccoc1n3)OC)O)OCO2</chem>                                                      |
| N508 | A | 0.47712125 | <chem>CC(C)=CCCC(C)=CCc1c(cc(c2C(c3c(ccc(c3O)c12)O)O)=O)O)O</chem>                                          |
| N504 | A | 0.47712125 | <chem>CC(C)=CCCC(C)=CCc1c(cc2c(C(c3c(ccc(c3O2)O)O)=O)c1O)O</chem>                                           |
| N509 | A | 0.47712125 | <chem>CC(C)=CCCC1(C)C=Cc2c(cc3c(C(c4c(ccc(c4O3)O)O)=O)c2O)O1</chem>                                         |
| N507 | A | 0.47712125 | <chem>CC(C1CCC=C(C[C@@H]([C@H]2C(=C)C(=O)O[C@@H]2C=1)OC(C(=C)CO)=O)COC(C)=O)=O</chem>                       |
| N501 | A | 0.47712125 | <chem>CC1(C)[C@H](Cc2c(cc(c3C(c4c(ccc(c4O)c23)O)O)=O)O)OC)[C@@]2(C)CC[C@@H]1O2</chem>                       |



|      |   |                 |                                                                                                              |
|------|---|-----------------|--------------------------------------------------------------------------------------------------------------|
| N510 | A | 0.47712125<br>5 | -<br>CC12CCc3coc(C(c4cc5C(C=CC(c5cc14)=O)=O)=O)<br>c23                                                       |
| N502 | A | 0.47712125<br>5 | -<br>Cn1ccc2cc3c(cc2c1Cc1ccc(cc1)O)OCO3                                                                      |
| N511 | A | 0.47712125<br>5 | -<br>COc1cc2c(c3ccoc3nc2cc1OC)OC                                                                             |
| N515 | A | 0.48234602<br>7 | -<br>CC(=O)O[C@H]1[C@H]2c3cc4c(cc3CN3CCC(=C[C@H]1O)[C@H]23)OCO4                                              |
| N516 | A | 0.48855071<br>7 | -<br>COc1cc2CCNC3Cc4ccc(c(c4c(c23)c1O)OC)OC                                                                  |
| N518 | A | 0.49136169<br>4 | -<br>[H]C1C([H])C(C)(C)[C@@]2(C([H])[C@@H](C3([H])C(c4ccoc4C[C@]3([H])[C@@]2(C)C1=C([H])OC(C)=O)=O)OC(C)=O)O |
| N520 | A | 0.49136169<br>4 | -<br>CC(C)=CC(c1c(cc2c(c1C)OC(c1c(C)cc(c(C=O)c1O2)O)=O)OC)=O                                                 |
| N519 | A | 0.49136169<br>4 | -<br>CC1(C)C2CC(C3(C)C(CCC4(C)C(c5ccoc5)OC(C5C34O5)=O)C2(C)C=CC1=O)O                                         |
| N521 | A | 0.49136169<br>4 | -<br>COC1C(C(CC23CCNC(C(c4ccc(c(c34)O)OC)O)C=12)O)O                                                          |
| N522 | A | 0.50514997<br>8 | -<br>CC(C)=CCCC1(C)C(CC=C(C)C)CC2(CC=C(C)C)C(C(=C(c3ccc(c(c3)O)O)O)C(C1(CC=C(C)C)C2=O)=O)=O                  |
| N523 | A | 0.50514997<br>8 | -<br>COc1cc(cc(c1OC)OC)OC1C(C(C(C(COC(c2cc(c(c(c2)O)O)O)=O)O1)O)O)O                                          |
| N524 | A | 0.50988689<br>2 | -<br>CC(C)=CCCC(C)=CCc1c2C(c3c(cc(c(CC=C(C)CO)c3O)O)Oc2cc(c1OC)O)=O                                          |
| N525 | A | 0.51054501      | -<br>CC(C)=CCc1ccc2c(C(CC(c3ccc(cc3)O)O2)=O)c1O                                                              |
| N526 | A | 0.51607503<br>7 | -<br>CC[C@H](CCC(C)C1CCC2C3CC=C4CC(CC[C@]4(C)C3CC[C@]12C)[C@H]1C(C([C@@H](C(CO)O1)O)O)C(C)C                  |
| N527 | A | 0.51688904<br>6 | -<br>CN1CCc2c3cc(c(c2Oc2cc4c(CCN(C)[C@H]4Cc4ccc(c(c4)Oc4ccc(CC13)cc4)O)c(c2OC)OC)OC)OC                       |
| N528 | A | 0.51851394      | -<br>C(CNC(c1cc(c[nH]1)[Br])=O)C=C1C(NC(N)=N1)=O                                                             |

|      |   |                      |                                                                                                                                                                                                                       |
|------|---|----------------------|-----------------------------------------------------------------------------------------------------------------------------------------------------------------------------------------------------------------------|
| N529 | A | -<br>0.51851394      | CC(=C)C(=O)OC1CC2(C)C(C=C(C(CO)=CC3C1C(=C)C(=O)O3)O2)=O                                                                                                                                                               |
| N530 | A | -<br>0.51851394      | CC[C@@H]1[C@](C)([C@@H]([C@@H](C)N(C)C[C@@H](C)C[C@](C)([C@@H]([C@@H](C)[C@@H]([C@@H](C)C(=O)O1)O[C@H]1C[C@](C)([C@H]([C@H](C)O1)O)OC)O[C@H]1[C@@H]([C@H](C[C@@H](C)O1)N(C)Cc1ccc(cc1)c1cn(CCCCCCCCCC(NO)=O)nn1)O)O)O |
| N531 | A | -<br>0.51851394      | CC[C@@H]1C[C@]2(CC)[C@@H]3[C@H]1[C@@H](CC)OO[C@]3(CC)C(=O)O2                                                                                                                                                          |
| N532 | A | -<br>0.51934499<br>1 | CC(C)c1c2CC[C@H]3C(C)(C)CCC[C@]3(C)c2cc(c1O)O                                                                                                                                                                         |
| N533 | A | -<br>0.52067235<br>3 | CC(C)c1cc2CCC3C(C)(C)CCCC3(C)c2cc1O                                                                                                                                                                                   |
| N534 | A | -<br>0.53019969<br>8 | CC1C2CCC3C4CC=C5C[C@H](CCC5(C)C4CCC23CN1C)NC                                                                                                                                                                          |
| N535 | A | -<br>0.53147891<br>7 | C1=CN2C(c3c1c1cccc1[nH]3)=Nc1cccc1C2=O                                                                                                                                                                                |
| N536 | A | -<br>0.53147891<br>7 | C1CNC(c2c(C1=C1C(NC(N)N1)=O)c(c[nH]2)[Br])=O                                                                                                                                                                          |
| N537 | A | -<br>0.53147891<br>7 | CC(=O)O[C@H]1CCC(C)(C)[C@@]2([C@H]([C@@H]([C@H]3C(=C)c4ccoc4C[C@@H]3[C@@]12C)OC(C)=O)OC(C)=O)O                                                                                                                        |
| N538 | A | -<br>0.53147891<br>7 | CC=C(C)C(NC1CCC2(C)C3CCC4(C)C(CCC4C(C)NC)C3CCC2C1OC(C)=O)=O                                                                                                                                                           |
| N540 | A | -<br>0.53147891<br>7 | CC1(C)C=Cc2c(cc3c(C(C(=C(c4ccc(cc4)O)O3)OC)=O)c2O)O1                                                                                                                                                                  |
| N539 | A | -<br>0.53147891<br>7 | CC1(C)C=Cc2c(ccc(C(C=Cc3ccc(cc3)O)=O)c2O)O1                                                                                                                                                                           |
| N541 | A | -<br>0.54294874<br>9 | CC(C)c1cc2CC[C@H]3C(C)(C)CCC[C@]3(C)c2cc1O                                                                                                                                                                            |
| N546 | A | -<br>0.54406804<br>4 | CC(=C)C(=O)O[C@H]1C[C@]23C(O)OCC(CC[C@H]2O3)=C[C@@H]2[C@@H]1C(=C)C(=O)O2                                                                                                                                              |
| N547 | A | -<br>0.54406804<br>4 | CC(C)=CCc1c2c(C=CC(C)(C)O2)c(c2C(c3cc(c(c3O)c12)O)OC)OC)=O)O                                                                                                                                                          |

|      |   |                 |        |                                                                                                                        |
|------|---|-----------------|--------|------------------------------------------------------------------------------------------------------------------------|
| N543 | A | 0.54406804<br>4 | -<br>4 | CC(C1CCC2C3CCC4C(C(=CCC4(C)C3CCC12C)NC=O)=O)N(C)C                                                                      |
| N544 | A | 0.54406804<br>4 | -<br>4 | CCCCCCCCCCCCCCCCOC1C(C(C(C(COC(C)=O)O1)O)O)OC1C(C(C(C(C)O1)OC(C)=O)OC(C)=O)OC(C)=O                                     |
| N545 | A | 0.54406804<br>4 | -<br>4 | COc1ccc(cc1)C1=CC(c2c(cc(c(c3cc(ccc3OC)C3=CC(c4c(cc(cc4O3)O)O)=O)c2O1)O)O)=O                                           |
| N548 | A | 0.54817891<br>5 | -<br>5 | CC1(C)C(CC[C@@]2(C)[C@H]1CC[C@]1(C)[C@@H]2CC[C@@H]2[C@H]3[C@@H](CC[C@]3(C)CC[C@@]12C)C(=C)C=O)=O                       |
| N550 | A | 0.55630250<br>1 | -<br>1 | [H]C(C(=C)[C@@H]1CC[C@]2(C)CC[C@]3(C)[C@](H))(CC[C@]4([H])[C@@]5(C)CCC(C(C)(C)[C@]5([H]))CC[C@@]34C)(O)O)[C@@]12[H])=O |
| N551 | A | 0.55630250<br>1 | -<br>1 | CC12CCCC3(C=[N+](CCO)C1)C2CCC12CCC(CC13)C(=C)C2O.[Cl-]                                                                 |
| N552 | A | 0.55630250<br>1 | -<br>1 | CCCC(=O)OC1CC2C(C)(CC=C(C)C=C)C(C)C(C(C23C(OC(C3=C1)OC(C)=O)OC(C)=O)O)OC(C=Cc1ccc(cc1)O)=O                             |
| N554 | A | 0.55630250<br>1 | -<br>1 | COc1cc(cc(c1O)OC)C1=CC(c2c(cc(c(c2OC)OC)OC)O1)=O                                                                       |
| N553 | A | 0.55630250<br>1 | -<br>1 | COc1ccc2c(CC3c4c(CCN3)c(c3c(c24)OCO3)OC)c1OC                                                                           |
| N555 | A | 0.56282079<br>9 | -<br>9 | CC(C)=CCCC(C)=CCc1c(cc2c(C(c3cc(c(cc3O2)O)O)C)=O)c1O)O                                                                 |
| N556 | A | 0.56585704<br>6 | -<br>6 | CC=C1CC2C3CC1C(CO)N2Cc1c2cccc2n(C)c13                                                                                  |
| N557 | A | 0.56820172<br>4 | -<br>4 | [H][C@@]1(C)C[C@@H](C2C(C[C@@]3(C)CC[C@]1(O)O3)OC(C=2COC(C)=O)=O)OC(C(=C)CO)=O                                         |
| N558 | A | 0.56820172<br>4 | -<br>4 | [H][C@]12CCC3=C(CC[C@]4(C)[C@]3(C)CC[C@@]3(C)CC[C@@](C)(C[C@]34[H])C(O)=O)[C@@]2(C)CCC(C1(C)C)=O                       |
| N559 | A | 0.56820172<br>4 | -<br>4 | [H]C1=C(C([H])(CC=C(C)C)c2cc3c(CC=C(C)C)c(C)c(CC=C(C)C)c(c3c(c2C1=O)O)O)O                                              |
| N563 | A | 0.56820172<br>4 | -<br>4 | CC(C)=CCc1c(cc(c2C(c3c(Cc12)c(CC=C(C)C)c(C)c(CC=C(C)C)c3O)=O)O)O                                                       |
| N560 | A | -               | -      | CC(C)=CCCC(C)=CCCC(C)=CCCC(C)=CCO                                                                                      |

|      |   |                      |                                                                                |
|------|---|----------------------|--------------------------------------------------------------------------------|
|      |   | 0.56820172<br>4      |                                                                                |
| N561 | A | -<br>0.56820172<br>4 | CC(C)CNC(C=CC=CCCCCCC=Cc1ccc2c(c1)OCO2)=O                                      |
| N562 | A | -<br>0.56820172<br>4 | CC1(C)C=Cc2c(cc(c3C(C4CC5c6c(C=4Oc23)c(cc(c6OC5(C)C)O)O)=O)O)O1                |
| N564 | A | -<br>0.56820172<br>4 | CCOC(C1=C2C(=c3ccccc3=N2)N(C)c2ccccc12)=O                                      |
| N565 | A | -<br>0.57167628<br>2 | CC1C(CC2C=1C1(C)C(CC(=O)OC)C3(C)C4C(C1O2)OC(C4(C)C=CC3=O)=O)c1ccoc1            |
| N566 | A | -<br>0.57457537<br>8 | CC(C)C1CCC2(C)CC3C(=CC(C12OO3)O)C=O                                            |
| N567 | A | -<br>0.57863921      | CC(=O)OCCCCCCCCCCC(C#CC#CC(C=C)OC(C)=O)O                                       |
| N568 | A | -<br>0.57978359<br>7 | CC(=O)OC1CCC(C)(C)C2(C(C(C3C(Cc4c(cco4)C3=C)C12C)O)OC(C)=O)O                   |
| N569 | A | -<br>0.58459938<br>3 | COC1=C(C(C(=CC1=O)C1Cc2cc(c(c(c2OC1)OC)OC)OC)=O)OC                             |
| N570 | A | -<br>0.58459938<br>3 | COC1=C(C(C(=CC1=O)C1Cc2cc(c(c(c2OC1)OC)OC)OC)=O)OC                             |
| N571 | A | -<br>0.59106460<br>7 | [H][C@@]1(C)C[C@@H](C2C(C[C@@]3(C)CC[C@]1(O)O3)OC(C=2COC(C)=O)=O)OC(C(C)=CC)=O |
| N572 | A | -<br>0.59106460<br>7 | C[C@]12CCC(c3coc(C(c4cc5C(C6=C(C(c5cc14)=O)S(CCN6)(=O)=O)=O)=O)c23)=O          |
| N573 | A | -<br>0.59106460<br>7 | CC(C)=CCc1c(c(CC=C(C)C)c2c(C(CC(c3ccc(cc3)O)O2)=O)c1O)O                        |
| N574 | A | -<br>0.59106460<br>7 | CC(C)=CCc1c(c(CC=C(C)C)c2c(C(CC(c3ccc(cc3)O)O2)=O)c1O)O                        |
| N575 | A | -<br>0.59106460<br>7 | CC(C)=CCc1c(c2C(c3cc(c(c(c3Oc2c2C=CC(C)(C)Oc12)O)OC)OC)=O)O                    |
| N576 | A | -<br>0.59372842<br>7 | CC(C)=CCCC(C)=CCCC(C)=CCCC1(C)C(CCCO)C(CCC1(C)O)=C(C)C=O                       |

|      |   |                 |                                                                                                                                                                                                                                                                                         |
|------|---|-----------------|-----------------------------------------------------------------------------------------------------------------------------------------------------------------------------------------------------------------------------------------------------------------------------------------|
| N577 | A | 0.59988307<br>2 | -<br>COc1cc(c2C(C=C(c3ccccc3)Oc2c1)=O)O                                                                                                                                                                                                                                                 |
| N578 | A | 0.60205999<br>1 | -<br>[H]C12Cc3ccc(c(c3c3c1c(CCN2([H])[H])cc(c3OC)OC)O)OC                                                                                                                                                                                                                                |
| N579 | A | 0.60205999<br>1 | -<br>[H]CC1(C)C2=C[C@@H]([C@]3([H])[C@@](C)(C[C@H]([C@]4(C)[C@H](CC[C@@]34C)[C@H](C)CC=CC(C)(C)O)O)[C@]2([H])CC[C@@H]1O)O                                                                                                                                                               |
| N584 | A | 0.60205999<br>1 | -<br>CC(=O)OC1CC(C2(C)c3cc4c(cco4)c(C)c3CCC2(C1(C)C)O)OC(C)=O                                                                                                                                                                                                                           |
| N581 | A | 0.60205999<br>1 | -<br>CC(=O)OC1CC2C(C)(C=CC(=O)OC2(C)C)C2CCC3(C)C(c4ccoc4)OC(C4C3(C12C)O4)=O                                                                                                                                                                                                             |
| N580 | A | 0.60205999<br>1 | -<br>CC1(C)C2=CC[C@H]3[C@]4(C)C[C@H]([C@@H]([C@@]4(C)CC([C@@]3(C)[C@@H]2C[C@@H](C1=O)O)=O)[C@](C)(C(C=CC(C)(C)O)=O)O)O                                                                                                                                                                  |
| N582 | A | 0.60205999<br>1 | -<br>Cc1c2C(c3c(ccc(c3O)C3(c4cccc(c4C(c4c3cc(c(C(=O)OC)c4C)O)=O)O)O)C(c2cc(c1C(=O)OC)O)=O)=O                                                                                                                                                                                            |
| N583 | A | 0.60205999<br>1 | -<br>Cc1c2C(c3c(cccc3O)C(c2cc(c1C(=O)OC)O)=O)=O                                                                                                                                                                                                                                         |
| N585 | A | 0.60205999<br>1 | -<br>Cc1cc2C(c3cc(cc(c3C(c2c(c1)O)=O)O)O)=O                                                                                                                                                                                                                                             |
| N586 | A | 0.60205999<br>1 | -<br>CCCCCCCCCCCCCCCC[C@]1(C)C[C@@](C)(CC(=O)OC)O1                                                                                                                                                                                                                                      |
| N588 | A | 0.61278385<br>7 | -<br>[H]C([H])=C1[C@@]23C([H])([H])C(=O)O[C@@]([H])(C4=C([H])[C@]([H])O[H])OC4=O)[C@]2(C([H])([H])[H])C([H])([H])C([H])([H])[C@]1([H])[C@@]1(C([H])([H])[H])[C@]([H])C([H])([H])C(C(C([H])([H])[H])(C([H])([H])[H])[C@]1([H])[C@@]([H])(C(=O)OC([H])([H])[H])OC(C([H])([H])[H])=O)=O)O3 |
| N589 | A | 0.61278385<br>7 | -<br>CC(C)=CCc1c(cc2c(C(c3c(cc(c3CC=C(C)C)OC)O)O2)=O)c1O)O                                                                                                                                                                                                                              |
| N590 | A | 0.61278385<br>7 | -<br>CC=CC(c1c(cc2cc(cc(c2c1OC)OC)OC)OC)OC)=O                                                                                                                                                                                                                                           |
| N591 | A | 0.61278385<br>7 | -<br>CC1(C)C2CC(C3(C)C(CCC4(C)C(c5ccoc5)OC(C5C34O5)=O)C2(C)C=CC1=O)=O                                                                                                                                                                                                                   |
| N592 | A | -               | -<br>CCCC[C@@H](CCCCCCCC[C@H](CC(O)=O)O)OC                                                                                                                                                                                                                                              |

|      |   |                      |                                                                                                                                                      |
|------|---|----------------------|------------------------------------------------------------------------------------------------------------------------------------------------------|
|      |   | 0.61278385<br>7      | 1[C@@H]([C@H]([C@@H]([C@@H](CO[C@@H]2[C@H]([C@H]([C@@H](C(C)O)O)O)O)O)O)O)[C@@H]1C([C@@H]([C@H]([C@@H](CO)O)O)O)O C1[C@@H]([C@@H]([C@@H](C(C)O)O)O)O |
| N593 | A | -<br>0.62013605<br>5 | CC(C)C1CC2C(C)(CC=1)C(CCC2(C)O)O                                                                                                                     |
| N596 | A | -<br>0.62324929      | CC(=O)OC1[C@H](C2C(C)(C)C(C=C[C@]2(C)C2CC[C@]3(C)C(CC=C3[C@]12C)c1ccoc1)=O)OC(C)=O                                                                   |
| N594 | A | -<br>0.62324929      | CC=C(C)C(=O)O[C@H]1[C@H]2C(=C)C(=O)O[C@@H]1[C@]1(C)[C@H](CC[C@@](C)([C@H]1[C@H]2OC(C(C)C)=O)O)O                                                      |
| N595 | A | -<br>0.62324929      | COc1cc2C3Cc4cc(c(cc4C[N+]3(CCc2cc1O)[O-])OC)OC                                                                                                       |
| N597 | A | -<br>0.63245729<br>2 | CN1CCc2cc3c(cc2C(Cc2ccc4c(c2C1)OCO4)=O)OC O3                                                                                                         |
| N598 | A | -<br>0.63245729<br>2 | COc1cc2CCN3Cc4c(CC3c2cc1O)ccc1c4OCO1                                                                                                                 |
| N599 | A | -<br>0.63245729<br>2 | COc1cc2CCN3Cc4c(CC3c2cc1O)ccc1c4OCO1                                                                                                                 |
| N600 | A | -<br>0.63346845<br>6 | CC(CCCCC#C)CC(C)C(N(C)C(Cc1cccc1)C(NC(C)C(N(C)C(C)C(N(C)C(Cc1ccc(cc1)OC)C(N)=O)=O)=O)=O)=O                                                           |
| N601 | A | -<br>0.63346845<br>6 | CC1(C)[C@H](CC[C@]2(C)C3CC[C@@]4(C)[C@@H]5C[C@](C)(CC[C@]5(C)CC[C@]4(C)C=3CC[C@@H]12)C(O)=O)O                                                        |
| N602 | A | -<br>0.64345267<br>7 | CC(=C)C(=O)OC1CC2(C)C(C=C(C(=C)C(C3C1C(=C)C(=O)O3)O)O2)=O                                                                                            |
| N603 | A | -<br>0.64345267<br>7 | CC1C2=CC([C@@](C)(C[C@@H]([C@H]3C(=C)C(=O)O[C@@H]3[C@H]1O)OC(C(C)=C)=O)O2)=O                                                                         |
| N604 | A | -<br>0.64345267<br>7 | CC1c2c(cc(c(c3ccc(c4c(cc(C)cc34)OC)OC)c2C[C@H](C)N=1)O)OC                                                                                            |
| N605 | A | -<br>0.64345267<br>7 | CC1c2c(cc(c(c3ccc(c4c(cc(C)cc34)OC)OC)c2C[C@H](C)N1C)OC)OC                                                                                           |
| N606 | A | -<br>0.64738297      | CC(C)C(=O)O[C@H]1C[C@@H]2[C@@](C)(CC=C(C)C=C)[C@@H](C)C[C@H]([C@]23C(=C1)[C@@H](OC(C)=O)O[C@H]3OC(C)=O)OC(c1cccc1)=O                                 |
| N607 | A | -<br>0.65062037      | CC(=C)C(=O)O[C@H]1C[C@H](C)C2=CC([C@](C)(C=C3C1=C(COC(C)=O)C(=O)O3)O2)=O                                                                             |

|      |   |                 |                                                                                                                                   |
|------|---|-----------------|-----------------------------------------------------------------------------------------------------------------------------------|
| N608 | A | 0.65127801<br>4 | -<br>CC=C1CN2CCC34C2CC1C1=CN2C5C(=CN(C13)c1cccc14)C1CC3C5(CCN3CC1=CC)c1cccc12                                                     |
| N609 | A | 0.65147074<br>5 | -<br>[H][C@]12Cc3ccc(cc3)Oc3cc(C[C@@]4([H])c5c(CC N4C)cc(c(c5Oc4c(CCN2C)c1cc(c4OC)OC)OC)O)ccc3O                                   |
| N614 | A | 0.65321251<br>4 | -<br>[H][C@]12CC[C@@]3([H])[C@@H](C(=O)OCCCC CCCC[C@@H]4C(=C5CCCN5C(=N)N4)C(=O)OCCC CNC(N)=N)[C@@H](C)NC(N[C@H](CCCCCCCC) C1)=N23 |
| N610 | A | 0.65321251<br>4 | -<br>[H][C@]12CC[C@]3([H])C[C@H](C)NC(=NC(CCCCC CCC(C)OC([C@H]4[C@@H](C)N=C5N[C@H](CCC CCCCC)C[C@]6([H])CN[C@]4([H])N56)=O)C1)N23 |
| N611 | A | 0.65321251<br>4 | -<br>[H][C@]12CC[C@]3([H])C[C@H](C)NC(=NC(CCCCC CCC(C)OC([C@H]4[C@@H](C)N=C5N[C@H](CCC CCCCC)C[C@]6([H])CN[C@]4([H])N56)=O)C1)N23 |
| N613 | A | 0.65321251<br>4 | -<br>[H][C@]12CCc3c(C(=O)OCCCCNC(N)=N)c(CCCCC) nc(NC(CCCCCCCCC)C1)n23                                                             |
| N612 | A | 0.65321251<br>4 | -<br>[H][C@]12CCc3c(C(O)=O)c(C)nc(N[C@H](CCCCC C)C1)n23                                                                           |
| N616 | A | 0.65321251<br>4 | -<br>C[C@H]1Cc2c(c3ccc(c4c(cccc34)OC)OC)c(cc(c2[C @@H](C)N1C)OC)OC                                                                |
| N615 | A | 0.65321251<br>4 | -<br>CC(=C)C(=O)O[C@H]1C[C@H](C)[C@@]2(CC[C@] (C)(CC3C1=C(COC(C)=O)C(=O)O3)O2)O                                                   |
| N617 | A | 0.65321251<br>4 | -<br>CC(C)=CCC1=C(c2ccc(cc2O)O)Oc2c3C=CC(C)(C)O c3cc(c2C1=O)O                                                                     |
| N621 | A | 0.65321251<br>4 | -<br>CC[C@H]1C=CCC[C@@]2(C[C@@H]3CC[C@@H] 4[C@H](C(=O)OCCCCCCCCCCCCCCC(N(CCCC N)CCCN)=O)[C@]5(CCC[C@@H](C)O5)N=C(N2)N3 4)O1       |
| N618 | A | 0.65321251<br>4 | -<br>CCCCCCC[C@@H]1C[C@@H]2CC[C@H]3[C@@H ](C(=O)OCCCCCCCC[C@@H]4C(=C5CCCN5C(= N)N4)C(=O)OCCCCNC(N)=N)[C@@H](C)N=C(N1)N 23         |
| N619 | A | 0.65321251<br>4 | -<br>CCCCCCC[C@@H]1C[C@@H]2CC[C@H]3[C@@ H](C(=O)OCCCCCCCC[C@@H]4C(=C5CCCN5C( =N)N4)C(=O)OCCCCNC(N)=N)[C@@H](C)N=C(N1) N23         |
| N622 | A | 0.65321251<br>4 | -<br>CCCCCCCCCCCCCCCCCCCC(=O)OC(COC(CCCC CCCCCCCCC)=O)CO[C@H]1[C@@H]([C@H]([C @@H]([C@@H](CN)O1)O)O)O                             |

|      |   |                 |                                                                                                                               |
|------|---|-----------------|-------------------------------------------------------------------------------------------------------------------------------|
| N620 | A | 0.65321251<br>4 | -<br>COC1C(C(CC23CCNC(Cc4ccc(c(c34)O)OC)C=12)O)<br>O                                                                          |
| N623 | A | 0.65609820<br>2 | -<br>CC1CCC(C2(C)CCC(CC12O)C(C)=C)=O                                                                                          |
| N625 | A | 0.66275783<br>2 | -<br>[H]C12C(C(C=O)C3=C(C(C(=C(C(C)C)C3=O)O)=O)<br>C2(C)CCCC1(C)C)O                                                           |
| N626 | A | 0.66275783<br>2 | -<br>CC(=O)OC1C(Cc2ccc(cc2)OC)NCC1O                                                                                           |
| N627 | A | 0.66275783<br>2 | -<br>CC1C(C(C(C(O1)OC1C(c2ccc(c(c2)O)O)Oc2cc(cc(c<br>2C1=O)O)O)OC(C=Cc1cccc1)=O)O                                             |
| N628 | A | 0.66707230<br>9 | -<br>CC(C)=CCCc1c(c2C(C3CC4c5c(C=3Oc2c2C=CC(C)<br>(C)Oc12)c(cc(c5OC4(C)C)O)O)=O)O                                             |
| N629 | A | 0.66838591<br>7 | -<br>[H][C@@]12C[C@@H](C=C3C(OC([C@@]13[C@H]<br>(C[C@@H](C)[C@@]2(C)CC=C(C)C=C)OC(c1cccc<br>1)=O)OC(C)=O)OC(C)=O)OC(C(C)CC)=O |
| N631 | A | 0.67209785<br>8 | -<br>CC(C)C1=CC(c2c(cc3c(CCCC3(C)C)c2C)C1=O)=O                                                                                |
| N632 | A | 0.67209785<br>8 | -<br>CC(C)C1=CC(c2c(cc3c(CCCC3(C)C)c2C)C1=O)=O                                                                                |
| N630 | A | 0.67209785<br>8 | -<br>CC(C)C1=CC2=CC=C3C(C)(C)CC(CC(C)c4ccc(c(c4)<br>O)O)CC3(C)C2=C(C1=O)O                                                     |
| N633 | A | 0.67209785<br>8 | -<br>CC1=CC2=CC(C=C3C2=C(C=C(C)O3)O1)=O                                                                                       |
| N634 | A | 0.67209785<br>8 | -<br>CCCCCCC=CCCCCCCC(C[C@]1(C[C@@H](C=C<br>C1=O)O)O)O                                                                        |
| N635 | A | 0.67209785<br>8 | -<br>CCCCCCC=CCCCCCCC1C[C@]2(C[C@@H](C=C<br>C2(O)O1)O)O                                                                       |
| N636 | A | 0.67209785<br>8 | -<br>CCCCCCCCCCCCCCCCOC1C(C(C(C(COC(C)=O)<br>O1)O)OC(C)=O)OC1C(C(C(C(C)O1)OC(C)=O)OC(C)<br>=O)OC(C)=O                         |
| N637 | A | 0.67424483<br>7 | -<br>CC(C)C1=CC(c2c(cc3c(CCCC3(C)C)c2C)C1=O)=O                                                                                |
| N638 | A | -               | -<br>CC1Cc2c(C(C)=N1)c(cc(c2c1c(C)cc(c2c(cccc12)OC)                                                                           |



|      |   |                 |                                                                                                           |
|------|---|-----------------|-----------------------------------------------------------------------------------------------------------|
|      |   | 0.67828482<br>1 | OC)OC)OC                                                                                                  |
| N639 | A | 0.68124123<br>7 | CC(C)=CCc1c(c2C(C3CC4c5c(C=3Oc2c2C=CC(C)(C)Oc12)c(cc(c5OC4(C)C)O)O)=O)O                                   |
| N640 | A | 0.68124123<br>7 | Cc1cc(c2c(cccc2c1c1c(cc2C[C@H](C)N[C@H](C)c2c1OC)O)OC)OC                                                  |
| N641 | A | 0.68394713<br>1 | CC(=C)C(=O)OC1CC2C(C)(C(C3C4C(C)(CO3)C=C(C(C24C)=O)O)C2=CCC(c3ccoc3)C12C                                  |
| N642 | A | 0.68841982<br>2 | CC(C)=CCC1=C(c2ccccc2C(C1=O)=O)O                                                                          |
| N643 | A | 0.69019608      | [H]C12C=C(C)C(C(CC(C(C)(C)CC=C(C)C(C2(C(C(C)C1OC(c1cccc1)=O)OC(C)=O)OC(C)=O)OC(C)=O)OC(C)=O)OC(C)=O)=O    |
| N644 | A | 0.69019608      | CC(C)c1cc2CCC3C(C)(C)CCCC3(C)c2cc1O                                                                       |
| N645 | A | 0.69019608      | CN1Cc2cc(c(cc2c2ccc3cc4c(cc3c12)OCO4)OC)OC                                                                |
| N646 | A | 0.69090018<br>7 | CC1Cc2c(c(cc(c2C(C)N1)OC)O)c1c(C)cc(c2c(cccc12)OC)OC                                                      |
| N647 | A | 0.69127724<br>2 | CCC1CC2CC3(C1N(CCc1c4cc(ccc4[nH]c13)OC)C2)C(=O)OC                                                         |
| N648 | A | 0.69292509      | CCCCC1cc2c(c3cc(C)ccc3C(C)(C)O2)c(c1C(=C)CC1(CCC(C)=CC1)C(C)C)O                                           |
| N649 | A | 0.69635638<br>9 | CC1(C)CCC[C@@]2(C)C1CC[C@@]1(CO1)[C@@H]2CC=C(C1CO1)C(=O)OC                                                |
| N650 | A | 0.69635638<br>9 | CC1(C)CCC[C@@]2(C)C1CC[C@@]1(CO1)[C@@H]2CC=C(C1CO1)C(=O)OC                                                |
| N657 | A | 0.69897000<br>4 | CC(=O)OC1CC(C)(C)C2(CCc3c(cc(c(C=O)c3C)O)C2(C)C1OC(C)=O)O                                                 |
| N653 | A | 0.69897000<br>4 | CC(=O)OCC[C@H]1C[C@H]2c3c(CCN2C[C@@H]1C=C)c1cc(ccc1[nH]3)O                                                |
| N654 | A | 0.69897000<br>4 | CC(C)=CC[C@@H]1C[C@]23C[C@H](C=CC(C)(C)O)C(C)(C)OC2=C(C(c2ccc(c(c2)O)O)=O)C([C@@](C=C(C)C)(C3=O)C1(C)C)=O |
| N655 | A | 0.69897000      | CC(C)=CC[C@@H]1C[C@]23C[C@H](CCC(C)(C)O)C(C)(C)OC2=C(C(c2ccc(c(c2)O)O)=O)C([C@@](CC                       |

|      |   |                 |                                                                                                                                                                             |
|------|---|-----------------|-----------------------------------------------------------------------------------------------------------------------------------------------------------------------------|
|      |   | 4               | =C(C)C)(C3=O)C1(C)C)=O                                                                                                                                                      |
| N652 | A | 0.69897000<br>4 | -<br>CC(C)=CC[C@@H]1C[C@@]23CC4CCC(C)(C)C[C@@<br>@]4(C)OC2=C(C(c2ccc(c(c2)O)O)=O)C([C@@](CC=<br>C(C)C)(C3=O)C1(C)C)=O                                                       |
| N656 | A | 0.69897000<br>4 | -<br>CC(C)=CC[C@H]1C[C@@]23C[C@@H](CC(C(C)(C<br>)O)O)C(C)(C)[C@@](CC=C(C)C)(C(C(=C2OC1(C)C)<br>C(c1ccc(c(c1)O)O)=O)=O)C3=O                                                  |
| N651 | A | 0.69897000<br>4 | -<br>CC(C)=CC[C@H]1C[C@@]23C[C@@H](CC=C(C)C<br>)C(C)(C)[C@@](CC=C(C)C)(C(C(=C2OC1(C)C)C(c1<br>ccc(c(c1)O)O)=O)=O)C3=O                                                       |
| N658 | A | 0.69897000<br>4 | -<br>CC(C)=CCc1c(C)cc2cc3c(C(=CC(C3(CC=C(C)C)CC<br>=C(C)C)=O)O)c(c2c1O)O                                                                                                    |
| N662 | A | 0.69897000<br>4 | -<br>Cc1cc(c2c(ccc(c3c(cc4C[C@H](C)N(C)[C@H](C)c4c<br>3OC)O)c2c1)OC)OC                                                                                                      |
| N659 | A | 0.69897000<br>4 | -<br>CC1CC(CCCC(C=C(C)C(C)O)O)(OC)OOC1CC(=O)<br>OC                                                                                                                          |
| N660 | A | 0.69897000<br>4 | -<br>CC1CC(CCCC=CC(C)=O)(OC)OOC1CC(=O)OC                                                                                                                                    |
| N661 | A | 0.69897000<br>4 | -<br>CCC(C)C(=O)OC1(c2cccc(c2C(c2c1cc(c(C(=O)OC)c<br>2C)O)=O)O)c1ccc2c(C(c3c(cc(c(C(=O)OC)c3C)O)C2<br>(c2ccc3C(c4cc(c(C(=O)OC)c(C)c4C(c3c2O)=O)O)=O<br>)OC(C(C)CC)=O)=O)c1O |
| N663 | A | 0.70415051<br>7 | -<br>CC12COC3C2C(C)(C2CCC4(C)C(CC=C4C2(C)C3O<br>)C2=CCOC2=O)C(C=C1)=O                                                                                                       |
| N664 | A | 0.70492263<br>9 | -<br>[H][C@]12C=C(C)C([C@@H]([C@@H](C(C)(C)CC=<br>C(C)[C@H]([C@]2([C@H]([C@H](C)[C@@H]1O)c1cc<br>ccc1)OC(C)=O)OC(C)=O)OC(C)=O)OC(C)=O)OC(C)<br>=O)=O                        |
| N665 | A | 0.70611230<br>6 | -<br>Cc1cc(c2c(ccc(c3c(cc(c4c3C[C@@H](C)N[C@@H]4<br>C)OC)O)c2c1)OC)O                                                                                                        |
| N666 | A | 0.70757017<br>6 | -<br>[H]C1(C(=C)C(CC)=O)[C@@]2(C)C=C(C)C[C@]1(C)<br>C=C(C)[C@@H]2C(C)=C[C@H]1CC(C=C1)=O                                                                                     |
| N670 | A | 0.70757017<br>6 | -<br>CC(C)C=Cc1cc(C=CC(c2cc(C=CC(C)C)c(cc2O)O)=<br>O)ccc1O                                                                                                                  |
| N667 | A | 0.70757017<br>6 | -<br>Cc1cc2C(C3C(C(C(C(O3)OC(c3cccc3)=O)O)O)O)c<br>3cccc(c3C(c2c(c1)O)=O)O                                                                                                  |
| N668 | A | -               | -<br>Cc1cc2C(C3C(C(C(C(O3)OC(c3cccc3)=O)O)O)O)c                                                                                                                             |

|      |   |                      |                                                                                                     |
|------|---|----------------------|-----------------------------------------------------------------------------------------------------|
|      |   | 0.70757017<br>6      | 3cccc(c3C(c2c(c1)O)=O)O                                                                             |
| N669 | A | -<br>0.70757017<br>6 | CCCCCCCCC=CC(N[C@H]1C[C@]2(C(C=C[C@H]<br>)[C@@H]2O[C@H]1O)[C!])=O)O)=O                              |
| N674 | A | -<br>0.71600334<br>4 | CC(=O)O[C@H]1[C@H]2[C@H]3[C@H](C(=O)O2)c2<br>ccoc2C[C@@H]3[C@@]2(C)[C@H](CCC(C)(C)[C@]<br>12O)O     |
| N672 | A | -<br>0.71600334<br>4 | CC(C)=CCC1=C(c2ccc(cc2O)O)Oc2cc3c(C=CC(C)(<br>C)O3)c(c2C1=O)O                                       |
| N671 | A | -<br>0.71600334<br>4 | CC(C)=CCc1c(cc(c(c1CC=C(C)C)O)O)C1CC(c2c(cc(<br>cc2O1)O)O)=O                                        |
| N673 | A | -<br>0.71600334<br>4 | CC(C)CC(=O)OC1CC2C(C)(CC=C(C)C=C)C(C)C(C(<br>C23C(OC(C3=C1)OC(C)=O)OC(C)=O)O)OC(C)=O                |
| N675 | A | -<br>0.71798846<br>6 | CC(C)=CCc1c(cc2c(C(c3c(CC=C(C)C)c(c(c(CC=C(C<br>)C)c3O2)O)OC)=O)c1O)O                               |
| N676 | A | -<br>0.72427587      | CC(C)=CCc1cc(cc(CC=C(C)C)c1O)C1CC(c2c(cc(c(C<br>C=C(C)C)c2O1)O)O)=O                                 |
| N677 | A | -<br>0.72427587      | CC(C)C1=CC2=CC=C3C(C)(C)CC(CC3(C)C2=C(C1<br>=O)O)OC(c1ccc(cc1)O)=O                                  |
| N678 | A | -<br>0.72754125<br>7 | CCC=C(C)CCC=C(C)c1c(cc2C(c3cc(C)cc(c3C(c2c1<br>O)=O)O)=O)O                                          |
| N679 | A | -<br>0.73239376      | C(C[C@@H]1c2c(CCN1)c1ccc(cc1[nH]2)[Br])CNC(N<br>)=N                                                 |
| N18  | A | -<br>0.73239376      | C(CC1c2c(CCN1)c1ccc(cc1[nH]2)[Br])CN=C(N)N                                                          |
| N681 | A | -<br>0.73239376      | CC1c2c(cc(c(c3ccc(c4c(cc(C)cc34)OC)O)c2C[C@H](<br>C)N=1)O)OC                                        |
| N680 | A | -<br>0.73239376      | CCCCCCC(CO)C=C(C)[C@H]([C@@H](C)C(=O)O[<br>C@@H]1CC[C@H](C)[C@@]2(C)CC3C(=C[C@]12<br>O)OC(C=3C)=O)O |
| N682 | A | -<br>0.73458915<br>2 | CC(=O)OC1CC2C(C)(C)C(CCC2(C)C2CCC3(C)C(c4<br>ccoc4)OC(C4C3(C12C)O4)=O)=O                            |
| N683 | A | -<br>0.73579392<br>4 | CC(C)C=Cc1c(cc(C=Cc2ccc(cc2O)O)cc1O)O                                                               |
| N684 | A | -<br>0.73877630<br>6 | CC(COC(C)=O)=CC(=O)O[C@H]1C[C@H](C)C2=C<br>C([C@](C)(C=C3C1=C(COC(C)=O)C(=O)O3)O2)=O                |
| N686 | A | -                    | CC(C)CC(=O)OC1CC2C(C)(CCC(=C)C=C)C(C)CC(                                                            |



|      |   |             |                                                                                                                      |
|------|---|-------------|----------------------------------------------------------------------------------------------------------------------|
| N699 | A | 0.755874856 | -<br>CC(CC1c2c(ccc(c2OC)OC)c2ccc3cc4c(cc3c2N1C)OCO4)=O                                                               |
| N701 | A | 0.759883191 | -<br>CC(=O)OC1CC2(C)C(c3ccoc3)OC(C3C2(C2(C)C1C1(C)C=CC(C(C)(C)C1CC2OC(C)=O)=O)O3)=O                                  |
| N702 | A | 0.762678564 | -<br>CC1=CC(c2c(ccc(c2C1=O)O)O)=O                                                                                    |
| N703 | A | 0.763427994 | -<br>[H]C12C(C(C)=C(C(CC(C(C)(C)CC=C(C)C(C2(C(C)C)C1OC(c1cccc1)=O)OC(C)=O)OC(C)=O)OC(C)=O)OC(C)=O)OC(C)=O)OC(C)=O)O  |
| N704 | A | 0.763427994 | -<br>CC(=C)C1CCC2(CCC3(C)C(CCC4C5(C)C(C(C(C)C)C)C5CCC34C)OC(c3ccc(c(c3)OC)O)=O)C(O)=O)C12)C(O)=O                     |
| N705 | A | 0.763427994 | -<br>CC(=O)OC1C2C(Cc3c(cco3)C2=C)C2(C)C(CCC(C)C)C2(C1O)O)=O                                                          |
| N706 | A | 0.763427994 | -<br>CCC(C)C(C(NC(C(C)C)C(NC(C(C)C)C(N(C)C(C(C)C)C(=O)OC(C(C)CC)C(N1CCCC1C(=O)OC)=O)=O)=O)=O)N(C)C(CCCC(CCCC#C)OC)=O |
| N707 | A | 0.763427994 | -<br>COC1=CC(C(=CC1=O)C(C=C)c1cccc1)=O                                                                               |
| N708 | A | 0.763427994 | -<br>COC1=CC(C(=CC1=O)C(C=C)c1cccc1)=O                                                                               |
| N709 | A | 0.763427994 | -<br>COC1=CC(C2=C(CCCc3cccc3O2)C1=O)=O                                                                               |
| N710 | A | 0.770817478 | -<br>CCC1C(=O)OC2(C)CC(C3C(C4C(C)(CCC12O)O4)OC(C=3COC(C)=O)=O)OC(C(=C)CO)=O                                          |
| N711 | A | 0.770852012 | -<br>[H]C12C=C(C)C(C(C)CC(C(C)(C)C=CC(C)(C(C2(C)C(C)C1OC(c1cccc1)=O)O)OC(C)=O)O)OC(C)=O)OC(c1cccc1)=O                |
| N712 | A | 0.770852012 | -<br>CCC(C)C(C(NC(C(C)C)C(N1CCC2C1C(N1CCCC1C(NC=Cc1cc(ccc1OC)O2)=O)=O)=O)=O)N(C)C                                    |
| N713 | A | 0.775974331 | -<br>CC(C)(C=C)c1cc(C=CC(c2ccc(cc2)O)=O)c(cc1O)OC                                                                    |
| N716 | A | 0.77815125  | -<br>[H][C@@]12C[C@@H](C=C3[C@@H](OC([C@@]23[C@@H](C[C@H](C)[C@]1(C)CC=C(C)C=C)O)OC(C)=O)OC(C)=O)OC(C(C)CC)=O        |
| N715 | A | -           | -<br>[H][C@]12C[C@]3(C)[C@@H](C)CC[C@H]([C@@]3                                                                       |

|      |   |                      |                                                                                                                 |
|------|---|----------------------|-----------------------------------------------------------------------------------------------------------------|
|      |   | 0.77815125           | 4[C@@H]([C@]2(O)OCC1=C)O4)OC([C@H](C)[C@@H](C(C)=CC(CCCCC)CO)O)=O                                               |
| N717 | A | -<br>0.77815125      | [H]C12C(C(C)=C(C(C(C(C)(C)CC=C(C)C(C2(C(C(C)C1OC(c1cccc1)=O)O)OC(C)=O)OC(C)=O)OC(C)=O)OC(C)=O)OC(C)=O)OC(C)=O)O |
| N721 | A | -<br>0.77815125      | CC(=O)OC(C1C(C)(C)C(C=CC1(C)C1CCC2(C)C(c3ccoc3)OC(CC2(C1=C)O)=O)=O)C(=O)OC                                      |
| N730 | A | -<br>0.77815125      | CC(C)=CCc1c(cc2c(C(c3c(cc(c(c3CC=C(C)C)OC)O)O2)=O)c1O)O                                                         |
| N722 | A | -<br>0.77815125      | CC(C)=CCc1c(cc2c(C(c3c(CC=C(C)C)c(c(c(CC=C(C)C)c3O2)O)O)=O)c1O)O                                                |
| N723 | A | -<br>0.77815125      | CC(C)=CCc1c(cc2c(C(c3c4C=CC(C)(C)Oc4c(c(CC=C(C)C)c3O2)O)=O)c1O)O                                                |
| N718 | A | -<br>0.77815125      | CC(C)=CCc1c(cc2c(C(c3c4CC(C(C)(C)Oc4c(c(CC=C(C)C)c3O2)O)O)=O)c1O)O                                              |
| N719 | A | -<br>0.77815125      | CC(C)=CCc1c2C(c3c(cc4c(C=CC(C)(C)O4)c3O)Oc2c(CC=C(C)C)c(c1O)O)=O                                                |
| N731 | A | -<br>0.77815125      | CC(C)=CCc1c2C(c3c(cc4c(C=CC(C)(C)O4)c3O)Oc2cc(c1OC)O)=O                                                         |
| N732 | A | -<br>0.77815125      | CC(C)=CCc1c2C(c3c(cc4c(CCC(C)(C)O4)c3O)Oc2cc(c1OC)O)=O                                                          |
| N720 | A | -<br>0.77815125      | CC(C)=CCCC(C)=CCc1c(cc2c(C(c3c(cc(c(c3CC=C(C)C)OC)O)O2)=O)c1O)O                                                 |
| N729 | A | -<br>0.77815125      | CC(C)=CCCC(C)=CCc1c2C(c3c(cc(cc3Oc2cc(c1OC)O)O)O)=O                                                             |
| N724 | A | -<br>0.77815125      | CC(C)C1=CC2=CC=C3C(C)(CCCC3(C)C2=C(C1=O)O)COC(C(C)C)=O                                                          |
| N725 | A | -<br>0.77815125      | CC(CCCCC#C)C(N(C)C(Cc1cccc1)C(NC(C)C(N(C)C(C)C(N(C)C(Cc1ccc(cc1)OC)C(N)=O)=O)=O)=O)=O                           |
| N726 | A | -<br>0.77815125      | CC(CCCCC#C)C(N(C)C(Cc1cccc1)C(NC(C)C(N(C)C(C)C(N(C)C(Cc1ccc(cc1)OC)C(N)=O)=O)=O)=O)=O                           |
| N727 | A | -<br>0.77815125      | CC=C(C)C=CCCC1(CC(C)C(CC(=O)OC)OO1)OC                                                                           |
| N728 | A | -<br>0.77815125      | CC1(C)C2CC(C3(C)C(CCC4(C)C(c5ccoc5)OC(C5C34O5)=O)C2(C)C=CC1=O)=O                                                |
| N734 | A | -<br>0.77815125      | COc1ccc(cc1)[C@@H]1CC(c2c(cc(c(c2O1)[C@@H]1C(c2c(cc(cc2O[C@H]1c1ccc(cc1)O)O)O)=O)O)=O)O)=O                      |
| N733 | A | -<br>0.77815125      | COc1ccc(cc1)C1CC(c2c(cc(c(C3=C(c4ccc(cc4)O)Oc4cc(cc(c4C3=O)O)OC)c2O1)O)O)=O                                     |
| N735 | A | -<br>0.78103693<br>9 | CCC(C)C(=O)O[C@@H]1C[C@@H]2[C@](C=O)(C(=C1)C=O)[C@H](C[C@@H](C)[C@@]2(C)CC=C(C)C=C)OC                           |
| N736 | A | -                    | CC(=O)OC(C1C(C)(C)C(C=CC1(C)C1CCC2(C)C(c3c                                                                      |

|      |   |             |                                                                                                        |
|------|---|-------------|--------------------------------------------------------------------------------------------------------|
|      |   | 0.782030428 | coc3)OC(CC2(C1=C)O)=O)=O)C(=O)OC                                                                       |
| N737 | A | 0.785329835 | CC(C)=CCc1cc(cc(CC=C(C)C)c1O)C1CC(c2c(cc(cc2O1)O)O)=O                                                  |
| N738 | A | 0.785329835 | CN1c2c(cccc2O)C(c2c1c(c(c2O)OC)OC)OC)=O                                                                |
| N740 | A | 0.785329835 | COc1cc(c2c(C=O)c(c3ccc(c(c3OC)O)OC)oc2c1)O                                                             |
| N739 | A | 0.785329835 | COc1ccc(cc1OC)C(CNC(C=Cc1cccc1)=O)OC(C=Cc1cccc1)=O                                                     |
| N741 | A | 0.787298101 | Cc1c(cc2CCc3c(ccc(c3O)O)C3CC(C)(C)Oc1c23)O                                                             |
| N742 | A | 0.79239169  | CC1c2c(cc(c(c3ccc(c4c(cc(C)cc34)O)OC)c2C[C@H](C)N1C)OC)OC                                              |
| N743 | A | 0.79716974  | CC(C)=CCCC(C)=CCc1c2C(c3c(cc(c(CC=C(C)C)c3O)O)Oc2cc(c1OC)O)=O                                          |
| N744 | A | 0.797959644 | [H][C@]12CC[C@H]([C@H](C)C=C[C@H](C)C(C)C)[C@@]2(C)CC[C@@]2([H])[C@]13C=C[C@]1(C[C@H](CC[C@@]12C)O)OO3 |
| N745 | A | 0.79934055  | CC(C)=CC[C@]12C([C@]3(C[C@@H](C(C)(C)O2)[C@]12C(=C3)C(c1c(cccc1O2)O)=O)OC)=O                           |
| N748 | A | 0.79934055  | CC(C)=CCc1ccc(C2=COc3cc(cc(c3C2=O)O)O)c(c1OC)O                                                         |
| N746 | A | 0.79934055  | CC(C)=CCCC(C)=CCc1c2C(c3c(cc(c(CC=C(C)C)c3O)O)Oc2cc(c1O)O)=O                                           |
| N747 | A | 0.79934055  | CC1C2C(NCc3nc(cs3)C(NC(CCSC)C3=NC(CS3)C(NC(Cc3cccc3)C(=N2)O1)=O)=O)=O                                  |
| N752 | A | 0.806179974 | C[C@H]1CC[C@@]2(C)[C@@H](CC=C3C(=O)O[C@H]([C@]23O)O)C1=C                                               |
| N750 | A | 0.806179974 | CC(=O)OC1CC2C(C)(C)C(C=CC2(C)C2CCC3(C)C(C(C=C3C12C)=O)c1ccoc1)=O                                       |
| N749 | A | 0.806179974 | CC(C)=CCC1=C(c2cc(c(cc2O)O)O)Oc2c3C=CC(C)(C)Oc3cc(c2C1=O)O                                             |
| N751 | A | 0.806179974 | CCC(C)C(C(NC(CC(C)C)C(N1CCC2C1C(N1CCCC1C(NC=Cc1cc(ccc1OC)O2)=O)=O)=O)N(C)C                             |
| N753 | A | 0.80888586  | CC=C1CN2CCc3c4cccc4n4C(C1CC2c34)C(=O)OC                                                                |

|      |   |                 |                                                                                                                                                                                                                             |
|------|---|-----------------|-----------------------------------------------------------------------------------------------------------------------------------------------------------------------------------------------------------------------------|
|      |   | 7               |                                                                                                                                                                                                                             |
| N754 | A | 0.81291335<br>7 | [H]C1CC(C2(C)C3([H])Cc4c(cco4)C([H])(C(=O)OC)C3([H])C([H])C(C2(C1(C)C)O)OC(C)=O)OC(C)=O                                                                                                                                     |
| N755 | A | 0.81291335<br>7 | [H]C1Cc2c(cc3c(cco3)c2C)C2(C)C(C(C(C(C)(C)C12O)OC(C)=O)OC(C)=O)OC(C)=O                                                                                                                                                      |
| N756 | A | 0.81291335<br>7 | CC(C)=CCc1cc2C3C(COc2cc1O)c1ccc(c(CC=C(C)C)c1O3)O                                                                                                                                                                           |
| N757 | A | 0.81291335<br>7 | CC(c1ccccc1)O[C@@H]1CC2C(C=C3C[C@H](CC[C@]23C)O[C@H]2[C@@H]([C@@H]([C@@H]([C@@H](CO)O2)O[C@H]2[C@@H]([C@@H]([C@@H]([C@@H](CO)O2)O[C@H]2[C@@H]([C@@H]([C@@H]([C@@H](CO)O2)O)OC)O)OC)O)O)[C@]2(CC[C@H](C(C)OC(C)=O)[C@@]12C)O |
| N758 | A | 0.81954393<br>6 | CC(=C)C1CCC2(CCC3(C)C(CCC4C5(C)C(CCC34C)C(C)(C)C=C5C=O)C12)C(O)=O                                                                                                                                                           |
| N759 | A | 0.81954393<br>6 | CC(C)=CCc1c(cc(cc1O)O)C1=CC(c2c(cc(c(CC=C(C)C)c2O1)O)O)=O                                                                                                                                                                   |
| N760 | A | 0.81954393<br>6 | CC(C1CCC2C3CCC4CC(CCC4(C)C3CCC12C)N(C)C(c1ccccc1)=O)NC                                                                                                                                                                      |
| N761 | A | 0.81954393<br>6 | CC1(C)C=Cc2c(ccc3C4C(COc23)c2ccc(cc2O4)O)O1                                                                                                                                                                                 |
| N762 | A | 0.81954393<br>6 | CC1CCC2=C(CCCC2(C)C)C1(C)CCC(C)=CCn1c[n+](C)c2c1c(N)ncn2.[Cl-]                                                                                                                                                              |
| N763 | A | 0.81954393<br>6 | COc1c(cc2c(C(C=C(c3ccc(c(c3)O)O)O2)=O)c1O)O                                                                                                                                                                                 |
| N764 | A | 0.82477646<br>3 | CC1=CC(c2c3cc(c(c(C)c3oc2C1=O)O)OC)=O                                                                                                                                                                                       |
| N765 | A | 0.82477646<br>3 | CC1=CC(c2c3cc(c(c(C)c3oc2C1=O)O)OC)=O                                                                                                                                                                                       |
| N766 | A | 0.82607480<br>3 | CC(C)=CCc1c(cc2c(C(C=C(c3ccc(cc3)O)O2)=O)c1O)O                                                                                                                                                                              |
| N768 | A | 0.82607480<br>3 | COc1cc2c(cc1O)C1CC(CC3CCCN13)OC(C=Cc1cc(c2c1)O)=O                                                                                                                                                                           |



|      |   |             |                                                                                                                     |
|------|---|-------------|---------------------------------------------------------------------------------------------------------------------|
| N769 | A | 0.826074803 | -<br>COc1ccc(cc1)[C@@H]1CC(c2c(cc(c2O1)[C@@H]1C(c2c(cc(cc2O[C@H]1c1ccc(cc1)O)O)O)=O)O)O)=O                          |
| N767 | A | 0.826074803 | -<br>COc1ccc(cc1c1c(cc(c2C(C=C(c3ccc(cc3)O)Oc12)=O)O)O)C1=CC(c2c(cc(cc2O1)O)O)=O                                    |
| N770 | A | 0.832508913 | -<br>CCC=C(C)C=CCCC1(CC(C)C(CC(=O)OC)OO1)OC                                                                         |
| N771 | A | 0.832508913 | -<br>COc1cc(ccc1O)C1=COc2cc(ccc2C1=O)O                                                                              |
| N772 | A | 0.838849091 | -<br>CC(=C)C1CC2=C(c3c(cc(c(c13)O)O)O)Oc1c3C=CC(C)(C)Oc3cc(c1C2=O)O                                                 |
| N773 | A | 0.838849091 | -<br>CC(C)C=Cc1c(cc2c(C(C(CC=C(C)C)=C(c3ccc(cc3O)O)O2)=O)c1O)OC                                                     |
| N774 | A | 0.838849091 | -<br>COc1cc(c(C(C=Cc2cc(c(c2)OC)OC)OC)=O)c(c1)OC)O                                                                  |
| N775 | A | 0.84509804  | -<br>[H]C(CC(=CCCC(C)=CCCC(C)=CCc1cc(cc(c1O)O)C(O)=O)C(O)=O)C=C(C)C                                                 |
| N776 | A | 0.84509804  | -<br>[H]C1C[C@@H]([C@]2(C)[C@@]3([H])Cc4c(cco4)[C@@]([H])(C(=O)O[H])C3([H])[C@H](C([C@]2(C1(C)C)O)OC(C)=O)O)OC(C)=O |
| N782 | A | 0.84509804  | -<br>C[C@H]1CC=C[C@H]([C@H]([C@H](CC=Cc2cc(cc(c2C(=O)O1)O)OC)O)O)O                                                  |
| N779 | A | 0.84509804  | -<br>CC(C)=CC(c1c(cc2c(c1C)OC(c1c(C)cc(c(C=O)c1O2)O)=O)O)=O                                                         |
| N778 | A | 0.84509804  | -<br>CC(CCC=C(C)CC[C@@H](C(C)(C)O)O)=CCCC=C(C)CCC=C(C)CC[C@H]([C@](C)(CO)O)O                                        |
| N777 | A | 0.84509804  | -<br>CC(CCC=C(C)CC[C@H](C(C)(C)O)O)=CCCC=C(C)CCC=C(C)CC[C@H]([C@](C)(CO)O)O                                         |
| N780 | A | 0.84509804  | -<br>CC1CC=CC(C(C(CC2C(c3cc(cc(c3C(=O)O1)O)OC)O2)O)O)O                                                              |
| N781 | A | 0.84509804  | -<br>CCCCC1=CC(C(CC=C(C)CCC=C(C)C)=C(C1=O)OC(C)=O)=O                                                                |
| N14  | A | 0.847008951 | -<br>C(c1cc2C(c3ccccc3C(c2c(c1)O)=O)O)=O)O                                                                          |
| N783 | A | 0.849113248 | -<br>CC=C1CN2C3CC1C(CO)(C2Cc1c2ccccc2n(C)c13)C(=O)OC                                                                |
| N784 | A | 0.84925765  | -<br>CC(C)=CCc1c(cc2c(C(c3c(cc(c(c3CC=C(C)C)OC)O)O2)=O)c1O)OC                                                       |

|      |   |                 |                                                                                                                                                                                                                                                                  |
|------|---|-----------------|------------------------------------------------------------------------------------------------------------------------------------------------------------------------------------------------------------------------------------------------------------------|
|      |   | 8               |                                                                                                                                                                                                                                                                  |
| N785 | A | 0.85125834<br>9 | CC1C(C(C(C(OCC2C(C(C(C(O2)OC2=C(c3ccc(c(c3)O)O)Oc3cc(cc(c3C2=O)O)O)O)O)O)O)O)O)O                                                                                                                                                                                 |
| N786 | A | 0.85308953      | CC(C)[C@@H](C)C=C[C@@H](C)[C@H]1CC[C@@]23[C@]4(C=C[C@@]56C[C@H](CC[C@]5(C)[C@]4(CC[C@]12C)OO6)O)O3                                                                                                                                                               |
| N787 | A | 0.85705091<br>8 | CC(C)[C@@H]1CC[C@@]2(CC[C@]3(C)[C@H](CC[C@@H]4[C@@]5(C)CC[C@@H](C(C)(C)[C@@H]5CC[C@@]34C)O)[C@@H]12)CO                                                                                                                                                           |
| N788 | A | 0.85733249<br>6 | [H][C@@]12CC=C(C)[C@@H](C[C@@H](C3=CC(=O)OC3O)O)[C@]2(C)CCCC1(C)C                                                                                                                                                                                                |
| N789 | A | 0.85733249<br>6 | [H]C(C(=C)[C@@H]1CC[C@]2(C)CC[C@]3(C)[C@](H))(CC[C@]4([H])[C@@]5(C)CC[C@]([H])(C(C)(C)[C@]5([H])CC[C@@]34C)O)[C@@]12[H])=O                                                                                                                                       |
| N792 | A | 0.85733249<br>6 | CC(C)=CC(c1c(C)c2c(c(c1OC)O)OC(c1c(C)c(c(C=O)c1O2)O)[Cl]=O)=O                                                                                                                                                                                                    |
| N791 | A | 0.85733249<br>6 | CC=C(C)C(=O)OC1CC2(C)C(C=C(C(CO)=CC3C1C(=C)C(=O)O3)O2)=O                                                                                                                                                                                                         |
| N793 | A | 0.85733249<br>6 | CC1CC2=C(C(C=C(C2=C(C)N1)OC)=O)c1c(C)cc(c2c(ccc12)O)OC                                                                                                                                                                                                           |
| N794 | A | 0.86033800<br>7 | CC(C)=CCc1cc2C(c3c(cc(c(CC=C(C)C)c3O)OC)Oc2c(c1OC)O)=O                                                                                                                                                                                                           |
| N795 | A | 0.86332286      | c1cc(ccc1C1C(C2C(c3ccc(cc3)O)Oc3cc(cc(c3C2=O)O)O)C(c2c(cc(cc2O1)O)O)=O)O                                                                                                                                                                                         |
| N796 | A | 0.86332286      | CC1Cc2cc3c(c(cc(c3c(c2C(=O)O1)O)O)O)c1c(cc(c2c(c3C(=O)OC(C)Cc3cc12)O)O)O                                                                                                                                                                                         |
| N797 | A | 0.86332286      | COC(CC1(C=CC(C=C1)=O)O)=O                                                                                                                                                                                                                                        |
| N798 | A | 0.86359192<br>7 | CN1CCc2cc(c(cc2C1Cc1ccc(cc1)Oc1c2CC3c4c(CC N3C)c(c(c4c2cc(c1OC)OC)OC)OC)OC)OC)OC                                                                                                                                                                                 |
| N799 | A | 0.86923172      | [H]C1C=C2C[C@H](CC[C@]2(C)C2C[C@H]([C@]3(C)[C@H](CC[C@@]3(C12)O)C(C)OC(C)=O)OC(C)c1cccc1)O[C@H]1[C@@H]([C@@H]([C@@H]([C@@H]([C@@H](CO)O1)O[C@H]1[C@@H]([C@@H]([C@@H]([C@@H]([C@@H](CO)O1)O[C@H]1[C@@H]([C@@H]([C@@H]([C@@H]([C@@H]([C@@H](CO)O1)O)OC)O)OC)O)OC)O |
| N800 | A | 0.86923172      | CC(C)C1CC[C@H]2C(=CC[C@H]3C(C)(C)CCC[C@]23C)C=1                                                                                                                                                                                                                  |
| N801 | A | -               | [H][C@@]12CC=CC([C@]2(C)C=C2C(C1)=C(C)C(=                                                                                                                                                                                                                        |

|      |   |                 |                                                                                                                                                                                                                                                                                                                           |
|------|---|-----------------|---------------------------------------------------------------------------------------------------------------------------------------------------------------------------------------------------------------------------------------------------------------------------------------------------------------------------|
|      |   | 0.87506126<br>3 | O)O2)=O                                                                                                                                                                                                                                                                                                                   |
| N802 | A | 0.87506126<br>3 | [H]C1C=C2C[C@H](CC[C@]2(C)C2C[C@H]([C@]3(C)[C@H](CC[C@@]3(C12)O)C(C)OC(C)=O)OC(C)c1cccc1)O[C@H]1[C@@H]([C@@H]([C@@H]([C@@H]([C@@H](CO)O1)O[C@H]1[C@@H]([C@@H]([C@@H]([C@@H]([C@@H](CO)O1)O[C@H]1[C@@H]([C@@H]([C@@H]([C@@H]([C@@H]([C@@H](CO)O1)O[C@H]1[C@@H]([C@@H]([C@@H]([C@@H]([C@@H]([C@@H](CO)O1)O)O)OC)O)OC)O)OC)O |
| N803 | A | 0.87506126<br>3 | c1c(C(O)=O)c(c2c3C(=O)Oc4c5c(C(=O)Oc(c35)c(c2O)O)c(c2c(cc(c2O)O)O)C(O)=O)c(c4O)O)c(c(c1O)O)O                                                                                                                                                                                                                              |
| N804 | A | 0.87563993<br>7 | C=CC(CO)C1CCN2CCc3c4cccc4[nH]c3C2C1                                                                                                                                                                                                                                                                                       |
| N805 | A | 0.88081359<br>2 | CC(C)=CC(CC(C)=CC(C1COC(C1=C)=O)O)=O                                                                                                                                                                                                                                                                                      |
| N806 | A | 0.88081359<br>2 | COc1cc(c2C(C=C(c3ccc4c(c3)OCO4)Oc2c1)=O)OC                                                                                                                                                                                                                                                                                |
| N808 | A | 0.88649072<br>5 | CC(C)=CCc1cc(cc(CC=C(C)C)c1O)C1CC(c2ccc(cc2O1)O)=O                                                                                                                                                                                                                                                                        |
| N809 | A | 0.88649072<br>5 | CC(C)C(C(N(C)C(C(C)C)C(N(C)C(C(C)C)C(N(C)C(Cc1cccc1)C(N)=O)=O)=O)=O)N(C)C(C(C)CCCC#C)=O                                                                                                                                                                                                                                   |
| N813 | A | 0.88649072<br>5 | CC(C)C=Cc1c(cc2c(C(C3CC(C(C)(C)O)Oc4cc(ccc4C=3O2)O)=O)c1O)OC                                                                                                                                                                                                                                                              |
| N810 | A | 0.88649072<br>5 | CC(Cc1ccc(c(c1)O)O)C(C)Cc1ccc(c(c1)O)O                                                                                                                                                                                                                                                                                    |
| N811 | A | 0.88649072<br>5 | CC1(C)C2=CCC3C(C)(C2CC(C1=O)O)C(CC1(C)C(C(C13C)O)C(C)(C=C(C)(C)O)=O)O)=O                                                                                                                                                                                                                                                  |
| N812 | A | 0.88649072<br>5 | CC1C(CCC2C1(C)CCC1C2(C)CCC2(C)C3CC(C)(C)CCC3(C)CCC12C)=O                                                                                                                                                                                                                                                                  |
| N814 | A | 0.88649072<br>5 | COc1ccc2c(c1)c(c1c3c4c(CCN3)cc3c(c4c4ccc(cc14)OC)OCO3)c1c3c(CCN1)cc1c(c23)OCO1                                                                                                                                                                                                                                            |
| N815 | A | 0.89209460<br>3 | C(=Cc1ccc(cc1)O)C(c1ccc(cc1O)O)=O                                                                                                                                                                                                                                                                                         |
| N816 | A | -               | C1CC2C(C(C1O2)C(O)=O)C(O)=O                                                                                                                                                                                                                                                                                               |

|      |   |                      |                                                                                                   |
|------|---|----------------------|---------------------------------------------------------------------------------------------------|
|      |   | 0.89209460<br>3      |                                                                                                   |
| N817 | A | -<br>0.89209460<br>3 | CC1(C)C2=CCC3C(C)(C2CC(C1=O)O)C(CC1(C)C(C(C13C)O)C(C)(C(C=CC(C)(C)O)=O)O)=O                       |
| N819 | A | -<br>0.89762709<br>1 | CC(=C)C1CC2=C(c3c1c(c1c(C=CC(C)(C)O1)c3O)O)Oc1cc(cc(c1C2=O)O)O                                    |
| N820 | A | -<br>0.89762709<br>1 | CC(C)C(=O)OC1(c2cccc(c2C(c2c1cc(c(C(=O)OC)c2C)O)=O)O)c1ccc2C(c3cc(c(C(=O)OC)c(C)c3C(c2c1O)=O)O)=O |
| N818 | A | -<br>0.89762709<br>1 | CC(c1c(cc(c2c(C)cc(c3C(c4c(cccc4O)C(c23)=O)=O)O)c1O)OS(O)(=O)=O)O)=O.[Na]                         |
| N821 | A | -<br>0.89762709<br>1 | CC1CCC23C(CC(C=C3C(OC2OC(C)=O)OC(C)=O)O)C1(C)CC=C(C)C=C                                           |
| N822 | A | -<br>0.90167703<br>2 | C[n+] <sub>1</sub> cc2c3c(ccc2c2ccc4cc5c(cc4c12)OCO5)OCO3                                         |
| N823 | A | -<br>0.90308998<br>7 | [H][C@@]1(C)C[C@H]([C@]([H])(C=C)C2C=C3c4c(CCN3C(=C)C1=2)c1cccc1[nH]4)OC1C(C(C(CO)O1)O)O          |
| N826 | A | -<br>0.90308998<br>7 | C[C@@H]1C(c2cc3c(cc2[C@@H](c2ccc(c(c2)OC)OC)[C@@H]1C)OCO3)=O                                      |
| N827 | A | -<br>0.90308998<br>7 | C[C@]12C[C@@H](C[C@@]3(C)C1[C@@H]([C@@H]1[C@@]4(COC(C=C24)=O)O1)OC3=O)O                           |
| N824 | A | -<br>0.90308998<br>7 | CC=C(C)C(=O)O[C@H]1C[C@]2(C)C(C=C(C(C)[C@@H]([C@@H]3[C@@H]1C(=C)C(=O)O3)O)O2)=O                   |
| N825 | A | -<br>0.90308998<br>7 | CCC(C)C(C(N(C)C(Cc1cccc1)C(NC(CC(C)C)C(Nc1cccc1C(O)=O)=O)=O)=O)N                                  |
| N828 | A | -<br>0.90363251<br>6 | C[C@]12C[C@@H](C[C@@]3(C)C1[C@@H](C=C1COC(C=C12)=O)OC3=O)O                                        |
| N829 | A | -<br>0.90363251<br>6 | C[C@]12C=C[C@@H]([C@@]3(C)C1[C@@H]([C@@H]1[C@@]4(COC(C=C24)=O)O1)OC3=O)O                          |
| N830 | A | -<br>0.90363251<br>6 | C[C@]12C=C[C@@H]([C@@]3(C)C1[C@@H](C=C1COC(C=C12)=O)OC3=O)O                                       |
| N832 | A | -<br>0.90363251      | C[C@]12C=CC[C@@]3(C)C1[C@@H]([C@@H]1[C@@]4(COC(C=C24)=O)O1)OC3=O                                  |

|      |   |                 |                                                                                                                         |
|------|---|-----------------|-------------------------------------------------------------------------------------------------------------------------|
|      |   | 6               |                                                                                                                         |
| N833 | A | 0.90363251<br>6 | <chem>C[C@]12C=CC[C@@]3(C)C1[C@@H](C=C1COC(C=C12)=O)OC3=O</chem>                                                        |
| N831 | A | 0.90363251<br>6 | <chem>C[C@]12CC[C@H]([C@@]3(C)C1[C@@H](C=C1COC(C=C13)=O)OC2=O)O</chem>                                                  |
| N834 | A | 0.90363251<br>6 | <chem>C[C@]12CCC[C@@]3(C)C1[C@@H](C=C1COC(C=C12)=O)OC3=O</chem>                                                         |
| N835 | A | 0.90363251<br>6 | <chem>CC12CCCC(C)(C1C=CC1(COC(CC12)=O)O)C(O)=O</chem>                                                                   |
| N836 | A | 0.90848501<br>9 | <chem>CCCCCCCCCCCCCCCCOC1C(C(C(C(COC(CCCC<br/>CCCCCCCCCCC)=O)O1)O)O)OC1C(C(C(C(C)O1)O<br/>C(C)=O)OC(C)=O)OC(C)=O</chem> |
| N837 | A | 0.91381385<br>2 | <chem>c1cc(c(cc1C1=C(C(c2ccc(cc2O1)O)=O)O)O)O</chem>                                                                    |
| N838 | A | 0.91381385<br>2 | <chem>CC(C)=CCc1c(cc(c(C(C=Cc2ccc(cc2)O)=O)c1O)OC)O</chem>                                                              |
| N839 | A | 0.91381385<br>2 | <chem>CC(C)C1c2nc(cs2)C(NC(C)c2nc(C(NC(C)c3nc(cs3)C(N1)=O)=O)c(C)o2)=O</chem>                                           |
| N840 | A | 0.91381385<br>2 | <chem>CC(C)C1c2nc(cs2)C(NC(C)c2nc(C(NC(C)c3nc(cs3)C(N1)=O)=O)c(C)o2)=O</chem>                                           |
| N841 | A | 0.91907809<br>2 | <chem>CC1(C)C=Cc2c(ccc3C4C(COc23)c2ccc(cc2O4)O)O1</chem>                                                                |
| N842 | A | 0.91907809<br>2 | <chem>CC1C(C)C(c2ccc(c(c2)OC)OC)OC1c1ccc(c(c1)OC)OC</chem>                                                              |
| N843 | A | 0.91907809<br>2 | <chem>CC1CCC2(C)C(C)C=CCC2C1(C)CCC(C)=CCn1c[n+](C)c2c1c(N)ncn2.[Cl-]</chem>                                             |
| N844 | A | 0.92427928<br>6 | <chem>[H][C@@]12c3c(cc(c(c3O)O)O)C(=O)O[C@@]1([H])[C@@H]([C@H]([C@H](CO)O2)O)OC(c1cc(c(c1)O)O)O)=O</chem>               |
| N845 | A | 0.92427928<br>6 | <chem>CC[C@H](C)[C@H](C(=O)O[C@@H](CC(C)C)C(N[C@@H](CC(C)C)C(N[C@@H](C)C=CC(N1C(C=C([C@@H]1C)OC)=O)=O)=O)N(C)C</chem>   |
| N846 | A | 0.92941892<br>6 | <chem>CC1(C)C=Cc2c(cc(c3C(C4CC5c6c(C=4Oc23)c(cc(c6OC5(C)C)O)O)=O)O)O)O1</chem>                                          |

|      |   |                      |                                                                                                                                                               |
|------|---|----------------------|---------------------------------------------------------------------------------------------------------------------------------------------------------------|
| N847 | A | -<br>0.93027393      | [H]c1c(c2C(C3CC4c5c(C=3Oc2c2C=CC(C)(C)Oc12)<br>c(cc(c5OC4(C)C)O)O)=O)O                                                                                        |
| N848 | A | -<br>0.93196611<br>5 | COc1cc(c2C(C(=COc2c1)c1ccc(cc1)O)=O)O                                                                                                                         |
| N849 | A | -<br>0.93449845<br>1 | C(CCCCc1cccc1)CCCC(c1c(cccc1O)O)=O                                                                                                                            |
| N851 | A | -<br>0.93449845<br>1 | CC1(C)CC[C@@]2(CC[C@]3(C)C(=CCC4[C@@]5(C)C[C@H]([C@@H](C(C)(C)C5CC[C@@]34C)O)O)C2C1)C(O)=O                                                                    |
| N850 | A | -<br>0.93449845<br>1 | CC1=CC(c2c(CC(C)=O)cc(cc2O1)O)=O                                                                                                                              |
| N852 | A | -<br>0.93449845<br>1 | Cc1c2C(CC(C)(C)Oc2cc2c1OC(c1c(C)c(c(c(C=O)c1O2)O)[Cl])=O)=O                                                                                                   |
| N853 | A | -<br>0.93449845<br>1 | Cc1cc(c2c(cccc2c1c1ccc2cc(C)nc(C)c2c1O)O)OC                                                                                                                   |
| N854 | A | -<br>0.93951925<br>3 | [H][C@@]12CC[C@@H]([C@](C)(CO)C1=C[C@@H]([C@]1([H])[C@@]2(C)CC[C@]2(C)[C@H](CC[C@@]12C)[C@H](C)C[C@H](C=C(C)C)O)O)O                                           |
| N855 | A | -<br>0.93951925<br>3 | CC(C)=CCc1c(ccc2C3C(COc12)c1ccc(c(CC=C(C)C)c1O3)O)O                                                                                                           |
| N858 | A | -<br>0.93951925<br>3 | CC(C)=CCc1cc(cc(c1OC)O)C1=COc2cc(cc(c2C1=O)O)O                                                                                                                |
| N857 | A | -<br>0.93951925<br>3 | CC1C(c2ccccc2)Oc2cc(c(cc12)O)OC                                                                                                                               |
| N856 | A | -<br>0.93951925<br>3 | CCC=C[C@H](CC)CCC[C@@]1(CC)C[C@@]2(CC)[C@H](CC(=O)O2)O1                                                                                                       |
| N859 | A | -<br>0.94448267<br>2 | C1C2C(C3C(C(O)O2)OC(c2cc(c(c(c2c2c(cc(c(c2O)O)O)C(=O)O3)O)O)O)=O)OC(c2cc(c(c(c2c2c3C(=O)O)c4c5c(C(=O)Oc(c35)c(c2O)O)c(c2c(cc(c(c2O)O)O)C(=O)O1)c(c4O)O)O)O)=O |
| N860 | A | -<br>0.94448267<br>2 | COc1cc2c(C(C[C@@H](c3ccc(cc3)O)O2)=O)c(c1OC)O                                                                                                                 |
| N862 | A | -<br>0.94939000<br>7 | CC(C)=CCc1c2C(c3c(cccc3Oc2c(c(c1OC)O)OC)O)=O                                                                                                                  |
| N861 | A | -                    | CN1c2c(cccc2O)C(c2c(cc(c(c12)OC)O)O)=O                                                                                                                        |

|      |   |                      |                                                                                                                 |
|------|---|----------------------|-----------------------------------------------------------------------------------------------------------------|
|      |   | 0.94939000<br>7      |                                                                                                                 |
| N863 | A | -<br>0.95036485<br>4 | CC(C1=COCC2C1CC1c3c(CC2N1C)c1cc(CC2C4CC5c6c(CC(C4COC2(C)O)N5C)c2cccc2n6C)c(cc1[nH]3)OC)=O                       |
| N865 | A | -<br>0.95424250<br>9 | CC(C)=CCc1cc2C3C(COc2cc1O)(c1ccc(c(CC=C(C)C)c1O3)OC)O                                                           |
| N864 | A | -<br>0.95424250<br>9 | Cc1cc(c2c(cccc2c1c1c(cc(c2c1C[C@H](C)N(C)[C@H]2C)OC)OC)OC)OC                                                    |
| N866 | A | -<br>0.95424250<br>9 | COc1ccc(CC(=C)C(=C)Cc2ccc(cc2)O)c(c1)O                                                                          |
| N867 | A | -<br>0.95424250<br>9 | COc1ccc(cc1)C1=CC(c2c(cc(c(c2O)O)OC)O1)=O                                                                       |
| N868 | A | -<br>0.95904139<br>2 | [H][C@]12[C@H](C(C(=C)C(=O)O2)[C@@H](C2(C)[C@@]1(C)[C@H](CC[C@]2(C)O)O)OC(C(C)=C)=O)OC(C(C)=CC)=O               |
| N869 | A | -<br>0.95904139<br>2 | CC(C)=CCc1cc(ccc1O)C1CC(c2c(cc(c(CC=C(C)C)c2O1)O)O)=O                                                           |
| N871 | A | -<br>0.95904139<br>2 | CC1CC23C4C(C(C)(C=C2C1=O)OC41C(CC(C)C3=O)C1(C)C)O                                                               |
| N870 | A | -<br>0.95904139<br>2 | CCC=C(C)CCC=C(C)CCCCC(C)=CC=C(C)CCCCC<br>CC(=O)OC                                                               |
| N872 | A | -<br>0.96378782<br>7 | CC1=CCCC2(C)C1=C(C(c1cc3C(C=CC(c3cc12)=O)=O)=O)O                                                                |
| N873 | A | -<br>0.96810548<br>5 | COC1CC2C3(C=C1)C(CN2Cc1cc2c(cc13)OCO2)O                                                                         |
| N874 | A | -<br>0.96848294<br>9 | COc1ccc2c(c3ccoc3nc2c1OC)OC                                                                                     |
| N875 | A | -<br>0.96975961<br>7 | CC(=O)O[C@H]1C[C@H](C(C)(C)C2C[C@H]([C@]3(C)C(CC[C@@]4(C)[C@H](c5ccoc5)OC([C@@H]5[C@]34O5)=O)[C@@]12C)O)OC(C)=O |
| N876 | A | -<br>0.97772360<br>5 | [H]c1c(cc(c(C(C=Cc2cccc2)=O)c1O)OC)O                                                                            |
| N878 | A | -<br>0.97772360      | CC1(C)C=Cc2c(ccc(C(CC(c3ccc4c(c3)OCO4)=O)=O)c2OC)O1                                                             |

|      |   |                 |                                                                                                                                                                                                                                                       |
|------|---|-----------------|-------------------------------------------------------------------------------------------------------------------------------------------------------------------------------------------------------------------------------------------------------|
|      |   | 5               |                                                                                                                                                                                                                                                       |
| N877 | A | 0.97772360<br>5 | <chem>Cc1c(c(C)c2c(C(CC(c3ccccc3)O2)=O)c1O)O</chem>                                                                                                                                                                                                   |
| N879 | A | 0.98136550<br>9 | <chem>CC(C)=CCCC(C)=CCC[C@]1(C)C=Cc2cc(ccc2O1)O</chem>                                                                                                                                                                                                |
| N880 | A | 0.98227123<br>3 | <chem>C1CCN2CC[C@H]3C(=C[C@@](CCC=CC1)([C@H]1[C@@]3(C[C@@H]3C=CCCCN13)C2)O)[C@@H]1c2c(CCN1CCc1c3c(ccn1)c1ccccc1[nH]3)c1ccccc1[nH]2</chem>                                                                                                             |
| N883 | A | 0.98227123<br>3 | <chem>CC(c1ccccc1)O[C@@H]1CC2C(C=C[C@@]3(C)C[C@H](CC[C@]23C)O[C@H]2[C@@H]([C@@H]([C@@H]([C@@H](CO)O2)O[C@H]2[C@@H]([C@@H]([C@@H]([C@@H](CO)O2)O[C@H]2[C@@H]([C@@H]([C@@H]([C@@H](CO)O2)O)O)OC)O)OC)O)OC)O)[C@]2(CC[C@H](C(C)OC(C)=O)[C@@]12C)O</chem> |
| N882 | A | 0.98227123<br>3 | <chem>CC1(C)C=Cc2cc(C=CC(c3ccc(cc3O)O)=O)ccc2O1</chem>                                                                                                                                                                                                |
| N884 | A | 0.98542647<br>4 | <chem>CC(C1=COCC2C1CC1c3c(CC2N1C)c1ccccc1n3C)=O</chem>                                                                                                                                                                                                |
| N885 | A | 0.98677173<br>4 | <chem>CC=C(COC1C(C(C(C(CO)O1)O)O)O)C1C=C2c3c(CCN2C(C=1CO)=O)c1ccccc1[nH]3</chem>                                                                                                                                                                      |
| N886 | A | 0.98677173<br>4 | <chem>CC1CCC2C(C=C(C)C(CC=1)O)OC(C2=C)=O</chem>                                                                                                                                                                                                       |
| N887 | A | 0.99122607<br>6 | <chem>CC1=CC(CC2C(C)(CCC3=CCOC3=O)C(CCC12C)COC(C)=O)=O</chem>                                                                                                                                                                                         |
| N888 | A | 0.99122607<br>6 | <chem>CC1=CCC(C2(C)CC3C(C(C12)O)C(=C)C(=O)O3)O</chem>                                                                                                                                                                                                 |
| N889 | A | 0.99563519<br>5 | <chem>CC(=C)C1CCC2(CCC3(C)C(CCC4C5(C)CCC(C(C)(C)C5CCC34C)O)C12)C(O)=O</chem>                                                                                                                                                                          |
| N890 | A | 0.99563519<br>5 | <chem>CC(C)C=Cc1c(cc2c(C(C3C(C=C(C)C)Oc4cc(ccc4C=3O2)O)=O)c1O)OC</chem>                                                                                                                                                                               |
| N891 | A | 0.99563519<br>5 | <chem>CCCCCCCc1cc(cc(c1)OC(c1c(CCCCCC)cc(cc1O)O)=O)O</chem>                                                                                                                                                                                           |



|      |   |                 |                                                                                              |
|------|---|-----------------|----------------------------------------------------------------------------------------------|
| N898 | N | -1              | CC(C)=CCCc1c(ccc2C[C@@H](COc12)c1ccc(c(c1O C)O)OC)OC                                         |
| N892 | N | -1              | CC[C@@H](C)C[C@]1(C)C=CC(=C2C([C@@H](CC(O)=O)OC2=O)=O)O1                                     |
| N893 | N | -1              | CC=CC1=CC=CC(=C2C(CNC2=O)=O)O1                                                               |
| N894 | N | -1              | CC1(C)CC2C3=CCC4C5(C)CCC(C(C)(CO)C5CCC4(C)C3(C)CCC2(C)C(C1)O)O                               |
| N895 | N | -1              | CCCCCCC1C2CC3C4C(C=CC1C24)C(=CC3O)C(O)=O                                                     |
| N897 | N | -1              | COC1=CC(C(=CC12CCc1cc(ccc12)O)O)=O                                                           |
| N896 | N | -1              | COc1cc(c(cc1CCc1cccc(c1)O)OC)O                                                               |
| N899 | N | 1.00106372      | C(C=Cc1cnc(N)[nH]1)NC(c1cc(c([nH]1)[Br])[Br])=O                                              |
| N903 | N | 1.00432137<br>4 | CC(C)(C=C)c1c(cc(c2C(C=C(c3ccc(cc3)OC)Oc12)=O)O)O                                            |
| N900 | N | 1.00432137<br>4 | CC=CCC=CCCC(C1C(C(N)=O)O1)=O                                                                 |
| N902 | N | 1.00432137<br>4 | CCCCCCC=CCCCCCCCc1cccc(c1C(O)=O)O                                                            |
| N901 | N | 1.00432137<br>4 | CCCCCCC=CCCCCCCCC1c1cccc(c1C(O)=O)O                                                          |
| N904 | N | 1.00434986<br>6 | CC1C(C)C(c2ccc3c(c2)OCO3)OC1c1ccc(c(c1)OC)OC                                                 |
| N905 | N | 1.00599512<br>3 | CC=C1CN2CCC34C2CC1C1C=C(C2CC56C7CC(C8C=CC(N(C58)c5cccc56)=O)C(CN27)=CC)C(N(C13)c1cccc14)=O   |
| N906 | N | 1.00860017<br>2 | CC1CCC2C(C)(C)C3CC12CCC3(C)O                                                                 |
| N907 | N | 1.01267209<br>8 | CCCCC1c1cc(c2C=CC(C)(CCC(C(C)=C)O)Oc2c1OC(C)=O)O                                             |
| N908 | N | 1.01283722<br>5 | C[C@@H]([C@H]1CC[C@H]2[C@@H]3CC[C@H]4C[C@H](CC[C@]4(C)[C@H]3CC[C@]12C)N(C)C(c1cccc1)=O)N(C)C |
| N913 | N | 1.01283722<br>5 | CC(C(=COC)C(=O)OC)=C(C=Cc1ccc(c(c1)OC)[Cl])OC                                                |
| N914 | N | 1.01283722<br>5 | CC(C(=COC)C(=O)OC)=C(C=Cc1cccc1)OC                                                           |

|      |   |                 |                                                                                                          |
|------|---|-----------------|----------------------------------------------------------------------------------------------------------|
| N911 | N | 1.01283722<br>5 | -<br>CC(C(C=Cc1cccc1)OC)C(=COC)C(=O)OC                                                                   |
| N909 | N | 1.01283722<br>5 | -<br>CC(C)=CCc1cc(C=CC(c2ccc(cc2O)O)=O)cc(c1O)O                                                          |
| N915 | N | 1.01283722<br>5 | -<br>CC(C)=CCO[C@H]1COc2ccc(C=CC(=C(C)C(=COC)C(=O)OC)OC)cc2OC1(C)C                                       |
| N910 | N | 1.01283722<br>5 | -<br>CC(C)C1CCC(C)=CC1c1c(cc2c(C(CC(c3cccc3)O2)=O)c1O)O                                                  |
| N912 | N | 1.01283722<br>5 | -<br>COC=C(C(C(C=Cc1ccc(c(c1)OC)[Cl])OC)OC)C(O)=O                                                        |
| N916 | N | 1.01703333<br>9 | -<br>CC(C)=CCCC(C)(C1CCC2(C)C1C(CC1C3(C)CCC(C)(C)C3CCC12C)O)O                                            |
| N917 | N | 1.01703333<br>9 | -<br>CC1(C)C2=CC(C=CC2=c2c(c(c(c3C=CNC1=c23)OC)OC)O)=O                                                   |
| N918 | N | 1.01703333<br>9 | -<br>CC1(C)C2CC[C@]3(C)C(C[C@H]([C@@H]4[C@H](CC[C@@]34C)[C@]3(C)CC[C@H](C(C)(C)O)O3)O)[C@@]2(C)CC[C@H]1O |
| N919 | N | 1.02118929<br>9 | -<br>[H]C1CC(C)(C)C2([H])CCC3=C[C@](C)(C[C@H]([C@]3([H])[C@@]2(C)[C@H]1O)O)C=C                           |
| N920 | N | 1.02118929<br>9 | -<br>CC1=C(C(C2CCc3cc(ccc3OC=2C1=O)O)=O)OC                                                               |
| N922 | N | 1.02118929<br>9 | -<br>CC1=CC(NC2=C1C(c1cccc1C2=O)=O)=O                                                                    |
| N921 | N | 1.02118929<br>9 | -<br>Cc1cc(c2c(cccc2c1c1ccc2cc(C)nc(C)c2c1O)OC)OC                                                        |
| N923 | N | 1.02184153<br>1 | -<br>COc1ccc(cc1)C1=CC(=O)Oc2c1c(cc(c2OC)OC)OC                                                           |
| N924 | N | 1.02326863<br>3 | -<br>CC(C#CC#CC#CC#CCCCCCCC(O)=O)O                                                                       |
| N925 | N | 1.02517294<br>6 | -<br>CC1(C)[C@H](CC[C@@]2(C)[C@H]1CC[C@]1(C)[C@@H]2CC[C@@H]2[C@H]3[C@@H](CC[C@]3(C)CC[C@@]12C)C(=C)C=O)O |
| N926 | N | -               | -<br>CN1Cc2c(ccc(c2OC)OC)c2ccc3cc4c(cc3c12)OCO4                                                          |

|      |   |                 |                                                                                              |
|------|---|-----------------|----------------------------------------------------------------------------------------------|
|      |   | 1.02530586<br>5 |                                                                                              |
| N927 | N | 1.02632893<br>9 | CC1C(C(C(C(O1)OC1=C(c2ccc(cc2)O)Oc2cc(cc(c2C1=O)O)O)O)O)O                                    |
| N928 | N | 1.02687599<br>6 | CC1(C)C=Cc2cc3C(C([C@@H](c4ccccc4)Oc3cc2O1)O)OC                                              |
| N929 | N | 1.02938377<br>8 | CC1C(C)C(c2ccc3c(c2)OCO3)OC1c1ccc(c(c1)OC)OC                                                 |
| N930 | N | 1.02952055<br>7 | COC(C(=C)C1C(C2C(=C)C(=O)OCC2(CC1OC(C(=C)CO)=O)C=C)O)=O                                      |
| N931 | N | 1.03489423<br>5 | CC(=C)C(CC=C(C)C)Cc1c(cc(c2C(CC(c3c(cccc3O)O)Oc12)=O)O)O                                     |
| N932 | N | 1.03742649<br>8 | CCC=CCC=CCC=CCCCCCCC(=O)OC                                                                   |
| N933 | N | 1.03742649<br>8 | CCCCCC1=CC(C=C(C1=O)OC)=O                                                                    |
| N934 | N | 1.03742649<br>8 | COc1cc2C3CC(CC4CCCCN34)OC(C=Cc3ccc(c(c3)c2cc1OC)O)=O                                         |
| N935 | N | 1.03782475<br>1 | COc1ccc(cc1)C1=COc2cc(c(cc2C1=O)OC)O                                                         |
| N936 | N | 1.04139268<br>5 | [H][C@]12[C@@H](C)C([C@@]34[C@H](C)C(C3=C[C@@]3(C)[C@@H]([C@@]4([H])[C@@]2(C1(C)C)O3)O)=O)=O |
| N937 | N | 1.04139268<br>5 | C1=C(c2ccc(c(c2)O)O)Oc2cc(cc(c2C1=O)O)O                                                      |
| N940 | N | 1.04139268<br>5 | C1=C(c2ccc(c(c2)O)O)Oc2cc(cc(c2C1=O)O)O                                                      |
| N938 | N | 1.04139268<br>5 | CCCCCCC1C2CC3C4C(C=CC1C24)C(=CC3O)C(O)=O                                                     |
| N939 | N | 1.04139268<br>5 | COc1cc(c(cc1OC)O)[C@@H]1COc2cc(ccc2C1=O)O                                                    |
| N941 | N | 1.05307844      | [H][C@]12[C@@H]([C@H]([C@H](COC(c3ccc(cc3)O)=O)O[C@]1([H])c1c(cc(c(c1O)O)O)C(=O)O2)O)O       |

|      |   |                 |                                                                                              |
|------|---|-----------------|----------------------------------------------------------------------------------------------|
|      |   | 4               |                                                                                              |
| N942 | N | 1.05690485<br>1 | <chem>CC1C=CNC2C=1C(C1=CC=C(C(C1=2)=O)OC)=O</chem>                                           |
| N943 | N | 1.05690485<br>1 | <chem>CCCCC1c1cc(c2C(C(CCC(C)=O)C(C)(C)Oc2c1)=O)O</chem>                                     |
| N944 | N | 1.05695336<br>5 | <chem>COc1cc(C=CC(CC(C=Cc2ccc(c(c2)OC)O)=O)=O)ccc1O</chem>                                   |
| N945 | N | 1.05897868<br>6 | <chem>CC1(C)C(CC(=O)OC)C2(C)C3CCC4(C)C(c5ccoc5)OC(C4(C3=C)OC2CC1=O)=O</chem>                 |
| N946 | N | 1.07188200<br>7 | <chem>CC(c1cc2C(c3ccc(c(c3C(c2o1)=O)OC)O)=O)=O</chem>                                        |
| N947 | N | 1.07448480<br>5 | <chem>CC(=O)OC1C2C(C)(C)C(CC[C@]2(C)C2CCC3(C)C(CC=C3C2C1O)c1ccoc1)=O</chem>                  |
| N950 | N | 1.07918124<br>6 | <chem>C(C(O)=O)c1cc(ccc1O)O</chem>                                                           |
| N948 | N | 1.07918124<br>6 | <chem>C[C@H]1[C@H](C)[C@@H](c2ccc(c(c2)O)O)O[C@@H]1c1ccc(c(c1)O)O</chem>                     |
| N949 | N | 1.07918124<br>6 | <chem>C=CC(C=Cc1ccc(cc1)O)c1ccc(cc1)O</chem>                                                 |
| N951 | N | 1.07918124<br>6 | <chem>C1C2C(Cc3ccc4c(c3)OCO4)C3C=CC4C(C1C(C=C4C(O)=O)=O)C23</chem>                           |
| N952 | N | 1.07918124<br>6 | <chem>COc1cc(C2=Cc3ccc(cc3OC2=O)O)c(cc1O)O</chem>                                            |
| N953 | N | 1.07918124<br>6 | <chem>COc1cc(ccc1O)C1C(COC(c2cccc2)=O)c2cc(C=CCOC(c3cccc3)=O)cc(c2O1)OC</chem>               |
| N954 | N | 1.08635983<br>1 | <chem>[H]C(c1cc2c3ccc(cc3[nH]c2cc1O)OC)=O</chem>                                             |
| N955 | N | 1.08635983<br>1 | <chem>CC(C)=CCc1c(cc2c(c1C)OC(c1c(C)c(c(c(C=O)c1O2)O)[Cl])=O)O</chem>                        |
| N956 | N | 1.08878997<br>4 | <chem>[H][C@]12C(C)C(C=C(C)[C@]1(C)C[C@]([H])([C@@H](C)[C@]2(C)CC[C@H](C)CC(O)=O)O)=O</chem> |

|      |   |                 |                                                                                                      |
|------|---|-----------------|------------------------------------------------------------------------------------------------------|
| N957 | N | 1.08990511<br>1 | -<br>Cc1cc(c(C=O)c2c1C(=O)Oc1c(cc3c(C(CC(C)(C)O3)=O)c1C)O2)O                                         |
| N958 | N | 1.08990511<br>1 | -<br>CN1c2cccc2C(c2c1cc(c(c2O)OC)OC)=O                                                               |
| N959 | N | 1.09223398<br>6 | -<br>[H]C1=C(c2cc([H])c(c(c2)OC)O)Oc2c([H])c(c([H])c(c2C1=O)OC)OC                                    |
| N960 | N | 1.09342168<br>5 | -<br>[H][C@]12CCN3CCCC=CCC[C@](C=C1C1c4c(CC N=1O)c1cccc1[nH]4)([C@H]1[C@@]2(CCC=CCCC CN1)C3)O        |
| N961 | N | 1.10380372<br>1 | -<br>[H]c1cc(cc(CC=C(C)C)c1C)C(=O)OC                                                                 |
| N964 | N | 1.10380372<br>1 | -<br>C(CCCCCCCCCCCC(=O)OCC(CO)O)CCCCCCCC CCCCCO                                                      |
| N962 | N | 1.10380372<br>1 | -<br>C[C@@H]1C2C3=CCC4[C@@]5(C)CC[C@@H]([C@@](C)(CO)C5CC[C@@]4(C)[C@]3(C)CC[C@]2(C C[C@H]1C)C(O)=O)O |
| N963 | N | 1.10380372<br>1 | -<br>CCC1=COCC2C1CC1c3c(CC2N1C)c1cccc1n3C                                                            |
| N965 | N | 1.10720997<br>1 | -<br>CC(C)=CCc1c(cc(c2C(C(COc12)(c1ccc(c(CC=C(C)C )c1OC)OC)O)=O)O)O                                  |
| N966 | N | 1.10720997<br>1 | -<br>COc1c2c(c3c4cccc4C(c4c3c1ccn4)=O)OCO2                                                           |
| N967 | N | 1.11394335<br>2 | -<br>CCCCCCC1C2CC3C=CC(C4C=CC1C2C34)C(O)=O                                                           |
| N968 | N | 1.11727129<br>6 | -<br>[H]N12C=C(C(C)C)C3CC1c1c(CC2C3(C)CO)c2cccc c2n1C                                                |
| N969 | N | 1.12057393<br>1 | -<br>C(C1C(C(C(C(O1)Oc1cc(C=Cc2ccc(cc2)O)cc(c1)O) O)O)O)O                                            |
| N970 | N | 1.12385164<br>1 | -<br>CCC=CCC=CCC=CCCCCCCCCc1cccc(c1C(O)=O) O                                                         |
| N971 | N | 1.13307940<br>7 | -<br>CCCCCCCC1=CC(=C(CCCCC)C(=O)O1)O                                                                 |
| N972 | N | 1.13353890<br>8 | -<br>CC(C)=CCc1cc(cc(c1O)OC)C1CC(c2ccc(cc2O1)O)= O                                                   |

|      |   |                 |                                                                                                             |
|------|---|-----------------|-------------------------------------------------------------------------------------------------------------|
| N973 | N | 1.14612803<br>6 | -<br>C1C2C=CC(C3C=CC4C(Cc5ccc6c(c5)OCO6)C1C4C23)C(O)=O                                                      |
| N974 | N | 1.14612803<br>6 | -<br>CCCCCCCCCCCCC1CC(NCCCNCCCCNCCCN1)=O                                                                    |
| N975 | N | 1.14961927<br>7 | -<br>CC(=O)OC(C1C(C)(C)C(C2CC3C(CCC4(C)C(c5ccco5)OC(CC=34)=O)C1(C)C2=O)O)C(=O)OC                            |
| N976 | N | 1.15228834<br>4 | -<br>CC=Cc1ccc(cc1)O                                                                                        |
| N977 | N | 1.16136800<br>2 | -<br>C([C@@H]1[C@H]([C@@H]([C@@H](O)O1)O)O)O<br>C1=C(c2ccc(c(c2)O)O)Oc2cc(cc(c2C1=O)OC(c1cc(c(c1)O)O)O)=O)O |
| N978 | N | 1.16381145<br>5 | -<br>[H][C@]12CCC=C(COC(C=Cc3ccc(c(c3)O)O)=O)[C@]1(C)C[C@H]([C@@H](C)[C@]2(C)CC[C@H](C)C(C(O)=O)O           |
| N979 | N | 1.16731733<br>5 | -<br>CN1c2ccccc2C(c2c1c(c(c(c2O)OC)OC)OC)=O                                                                 |
| N980 | N | 1.16731733<br>5 | -<br>COc1cc(ccc1O)C1=C(C(c2c(cc(cc2O1)O)O)=O)O                                                              |
| N981 | N | 1.17609125<br>9 | -<br>C[C@H]1C([C@@H](C[C@H]2[C@]3(C)CC[C@@]4(C)C5CC(C)(C)CC[C@@]5(CC[C@]4(C)[C@H]3CC[C@]12C)CO)O)=O         |
| N982 | N | 1.17609125<br>9 | -<br>C1=C(c2ccc(cc2)O)Oc2c(C3C(c4ccc(cc4)O)Oc4cc(c(c4C3=O)O)O)c(cc(c2C1=O)O)O                               |
| N985 | N | 1.17609125<br>9 | -<br>CC(=C)C(CC=C(C)C)C[C@@]12C[C@@H](CC=C(C)C)C(C)(C)[C@@](CC=C(C)C)(C(C(=C1O)C(c1ccc(c(c1)O)O)=O)=O)C2=O  |
| N983 | N | 1.17609125<br>9 | -<br>CC(C)=CC(CC(=CCCC(C)=CCCC(C)=CCc1cc(cc(c1O)O)C(O)=O)C(O)=O)O                                           |
| N984 | N | 1.17609125<br>9 | -<br>CC(C)=CC[C@@H]1C[C@]2(CC3CCC(C)(C)C=C3C)C(=C(C(c3ccc(c(c3)O)O)=O)C([C@@](CC=C(C)C)(C2=O)C1(C)C)=O)O    |
| N986 | N | 1.17609125<br>9 | -<br>CC1C(CCC2C1(C)CCC1C2(C)CCC2(C)C3CC(C)(C)CCC3(CCC12C)C=O)=O                                             |
| N987 | N | 1.17609125<br>9 | -<br>CCCCCCCCCCCCC1CC(NCCCNCCCCNCCCN1)=O                                                                    |
| N988 | N | -               | -<br>CCC(C)C1C(N(C)C(Cc2ccccc2)C(=O)OC(C(C)C)C(N                                                            |

|           |   |                      |                                                                                   |
|-----------|---|----------------------|-----------------------------------------------------------------------------------|
|           |   | 1.17719176<br>5      | (C)C(Cc2ccccc2)C(=O)OC(C(C)C)C(N(C)C(Cc2ccccc2)C(=O)O1)=O)=O)=O                   |
| N989      | N | -<br>1.18103920<br>6 | C1=C(C(c2c(cc(cc2O1)O)O)=O)c1ccc(cc1)O                                            |
| N990      | N | -<br>1.18403466<br>5 | CC1CC2C(CC=C1C=CC(C)=O)C1(C(=CC3(C(C)CC4C(CC3O1)C(=C)C(=O)O4)O)C(C)=O)C(=O)O2     |
| N991      | N | -<br>1.18469143<br>1 | CC1=CC2C(CCC(=C)C(CC1O)O)C(=C)C(=O)O2                                             |
| N992      | N | -<br>1.19033169<br>8 | [H]C(c1cc2c3ccc([H])cc3[nH]c2cc1O)=O                                              |
| N993      | N | -<br>1.19865708<br>7 | CN1c2ccccc2C(c2c1cc(c(c2O)OC)OC)=O                                                |
| N994      | N | -<br>1.19970977<br>1 | CC1Cc2c(c3ccc(c4c(cc(C)cc34)O)OC)c(cc(c2C(C)N1)OC)O                               |
| N995      | N | -<br>1.20006988<br>2 | COc1cc2c(C(c3ccccc3N2)=O)c(c1OC)O                                                 |
| N996      | N | -<br>1.20139712<br>4 | Cc1cc(c2c(cc(cc2c1c1c(cc(c2c1C[C@H](C)N(C)[C@H]2C)OC)OC)OC)OC)OC                  |
| N997      | N | -<br>1.20311577<br>8 | CC(=C)[C@H](CC=C(C)C)Cc1c(cc(c2C(C[C@@H](c3c(cccc3O)O)Oc12)=O)O)OC                |
| N100<br>2 | N | -<br>1.20411998<br>3 | C[C@@](C=C)([C@H](C=CC(=C[Cl])C([Cl])[Cl])[Cl])[Cl]                               |
| N998      | N | -<br>1.20411998<br>3 | CC(C)=CCc1c(c(CC=C(C)C)c2c(C(c3ccccc3O2)O)=O)c1O)O                                |
| N999      | N | -<br>1.20411998<br>3 | CC1C(C(CC2C1(C)CCC1C2(C)CCC2(C)C3CC(C)(C)CCC3(C)CCC12C)O)=O                       |
| N100<br>0 | N | -<br>1.20411998<br>3 | CC1C(CCC2C1(C)CCC1C2(C)CCC2(C)C3CC(C)(C)CCC3(C)CCC12C)=O                          |
| N100<br>1 | N | -<br>1.20411998<br>3 | CC1CCC2(C(C)C3C(CC4C5=CCC6=CC(C(CC6(C)C5CC(C34C)O)O)=O)O2)OC1                     |
| N100<br>3 | N | -<br>1.21218760      | [H][C@@]12CCN3CCCC=CCC[C@]4([C@H]([C@]2([H])[C@@]2([H])c5c(CCN2CCc2c6c(ccn2)c2ccc |

|       |   |                 |                                                                                |
|-------|---|-----------------|--------------------------------------------------------------------------------|
|       |   | 4               | cc2[nH]6)c2cccc2[nH]5)O4)[C@H]2[C@@]1(C[C@]1([H])C=CCCCN12)C3                  |
| N1005 | N | 1.21218760<br>4 | C[C@@H](CC(c1c(cc2c(C=CC(C)(C)O2)c1O)OC)=O)c1cccc1                             |
| N1004 | N | 1.21218760<br>4 | CC(C)=CCc1cc(cc(c1C)O)C(=O)OC                                                  |
| N1006 | N | 1.21748394<br>4 | CC(CCC=C(C)C)c1ccc(C)cc1O                                                      |
| N1007 | N | 1.21774707<br>3 | CC(C)CC(=O)OC1C2C(C=C(C)C3=CC(C(C)(C1O)O3)=O)OC(C2=C)=O                        |
| N1008 | N | 1.22788670<br>5 | COc1cc2c(C(C=C(c3ccc(cc3)O)O2)=O)c(c1OC)O                                      |
| N1009 | N | 1.22840035<br>9 | CC1(C)C=Cc2c(ccc(C(Cc3ccc(cc3)OC)=O)c2O)O1                                     |
| N1010 | N | 1.23044892<br>1 | C[C@](C=C)([C@@H](C=CC(=C)C([Cl])[Cl])[Cl])[Cl]                                |
| N1011 | N | 1.23044892<br>1 | C1=C(c2ccc(c(c2)O)O)Oc2c(C3C(c4ccc(cc4)O)Oc4cc(cc(c4C3=O)O)O)c(cc(c2C1=O)O)O   |
| N1012 | N | 1.23044892<br>1 | CC(=O)OC1CCG2(C)C(CCC3(C)C2CC=C2C4CC(C)(C)CCC4(CCC23C)C(Nc2ccc(C)cc2)=O)C1(C)C |
| N1013 | N | 1.23044892<br>1 | CC1C(CCC2C1(C)CCC1C2(C)CCC2(C)C3CC(C)(C)CCC3(CCC12C)CO)=O                      |
| N1014 | N | 1.23044892<br>1 | COc1cc2c(C(c3ccccc3N2)=O)c(c1OC)O                                              |
| N1015 | N | 1.23051566<br>7 | c1cc(c2C(c3cc(ccc3Oc2c1)O)=O)O                                                 |
| N1016 | N | 1.23070431<br>4 | CC1(C)C=Cc2c(ccc(C(Cc3ccc(c(c3)O)O)=O)c2O)O1                                   |
| N1017 | N | 1.23790715<br>4 | CCCC(=O)OC1(C)CCC2C(C)C(=O)OC3(C)CCC(C(=C)CC4C1C2C3O4)OC(C)=O                  |
| N1018 | N | 1.24054924<br>4 | C1=C(c2ccc(cc2)O)Oc2cc(cc(c2C1=O)O)O                                           |



|       |   |             |                                                                                                                               |
|-------|---|-------------|-------------------------------------------------------------------------------------------------------------------------------|
|       |   | 8           |                                                                                                                               |
| N1019 | N | 1.247814115 | <chem>CC(=O)O[C@H]1C[C@H](C(C)(C)C2C[C@H]([C@@]3(C)C(CC[C@@]4(C)[C@H](c5ccoc5)OC([C@@H]5[C@]34O5)=O)[C@@]12C)O)OC(C)=O</chem> |
| N1020 | N | 1.252607094 | <chem>CCCCC1cc(c(CC=C(C)CCC=C(C)C)c(c1O)OC(C)=O)O</chem>                                                                      |
| N1021 | N | 1.252847634 | <chem>CC(C)=CCc1c(c(C=O)cc2c3cccc3[nH]c12)O</chem>                                                                            |
| N1022 | N | 1.252853031 | <chem>[H]C(c1c2c(cc(cc2oc1c1ccc(c(c1OC)O)O)OC)O)=O</chem>                                                                     |
| N1025 | N | 1.255272505 | <chem>CC(C)=CCO1cc(c2C(c3c(cc(C)cc3O)c2c1)O)=O)O</chem>                                                                       |
| N1024 | N | 1.255272505 | <chem>CC1(C)[C@H](Cc2cc(C[C@@]3(C(=C(C(=C)O3)O)c3ccc(cc3)O)C(=O)OC)ccc2O1)O</chem>                                            |
| N1023 | N | 1.255272505 | <chem>CC1CCC=C2C1(C)CCC(C)C2(C)CCC(C)=CCn1c[n+](C)c2c1c(N)ncn2.[Cl-]</chem>                                                   |
| N1026 | N | 1.257678575 | <chem>C(C1[C@H](C(C([C@H](c2c(cc3c(C(c4cc(c(cc4O3)O)O)=O)c2O)O)O1)O)OC(C=Cc1ccc(cc1)O)=O)O)O</chem>                           |
| N1027 | N | 1.259699298 | <chem>CC(=C)C1CC2=C(c3c1c(c1c(C=CC(C)(C)O1)c3O)O)Oc1cc(cc(c1C2=O)O)O</chem>                                                   |
| N1028 | N | 1.278753601 | <chem>CC12CCCC(CO)(C1C(CC1CC(=C)C3CCC12C3)OC(c1cccc1)=O)C(O)=O</chem>                                                         |
| N1029 | N | 1.278753601 | <chem>CCCCCCCC[C@]1(CC[C@@H](C)C(=O)O[C@@](CCCCCCCC)(CC[C@@H](C)C(=O)O1)CO)CO</chem>                                          |
| N1030 | N | 1.283301229 | <chem>CC(C)=CCc1c(C=Cc2cccc2)cc(cc1OC)O</chem>                                                                                |
| N1031 | N | 1.284430734 | <chem>C1CCc2cccc2C1</chem>                                                                                                    |
| N1032 | N | 1.295324839 | <chem>CC1CC=CC(C(CCC=Cc2cc(cc(c2C(=O)O1)O)O)O)O</chem>                                                                        |
| N1033 | N | 1.29666519  | <chem>CC1(C)C2CC[C@]3(C)C(CCC4C5C(CC[C@]5(C)CC[C@@]34C)C(C)(C)O)[C@@]2(C)CC[C@H]1O</chem>                                     |
| N103  | N | -           | <chem>Cc1c(cc(c2C(C[C@@H](c3cccc3)Oc12)=O)OC)OC</chem>                                                                        |

|       |   |                 |                                                                                                    |
|-------|---|-----------------|----------------------------------------------------------------------------------------------------|
| 4     |   | 1.29666519      |                                                                                                    |
| N1035 | N | 1.29704208<br>2 | CC([C@H]1CC[C@@]2(C3CC=C4C[C@H](CC[C@]4(C)C3C[C@H]([C@]12C)Oc1cccc1)OC1C(C(C(C(CO)O1)O)O)O)OC(C)=O |
| N1037 | N | 1.30102999<br>6 | CC1(C)C=Cc2c(cc(c3C(CC(c4cccc4)Oc23)=O)O)O1                                                        |
| N1036 | N | 1.30102999<br>6 | CC1(C)C=Cc2c(ccc3C(C4C(COc5cc(c(cc45)OC)OC)Oc23)=O)O1                                              |
| N1038 | N | 1.30102999<br>6 | CC1(C)C2CC=C(C=O)C1C2                                                                              |
| N1039 | N | 1.30102999<br>6 | CC1(C)C2CC=C(CO)C1C2                                                                               |
| N1040 | N | 1.30102999<br>6 | CC1(C)C2CC1C(=C)C(C2)O                                                                             |
| N1041 | N | 1.30102999<br>6 | CN(CCc1cc(c(c1)[Br])OCCNC(C1CC2(CC(=C(C(=CO2)[Br])OC)[Br])ON=1)=O)[Br])C(N)=O                      |
| N1042 | N | 1.30318174<br>8 | c1cc(c(cc1C1=C(C(c2c(cc(cc2O1)O)O)=O)O)O)O                                                         |
| N1043 | N | 1.31175386<br>1 | C=C(Cc1ccc(cc1)O)C(=C)Cc1ccc(cc1)O                                                                 |
| N1044 | N | 1.32221929<br>5 | CC(C)=CCc1c(ccc2c3COc4cc(ccc4c3oc12)O)OC                                                           |
| N1045 | N | 1.32428245<br>5 | C[C@@H]1C[C@@]2(C)C(CC[C@]3(C)C2CC=C2C4CC(C)(C)CC[C@@]4(CC[C@]23C)C(O)=O)C(C)(C)[C@H]1O            |
| N1046 | N | 1.32577395<br>9 | [H]C1=C(c2ccc(cc2)O)Oc2c(CCC=C(C)C)c(c(CCC=C(C)C)c(c2C1=O)O)O                                      |
| N1047 | N | 1.33043619<br>1 | CCCC(=O)OC1(C)CCC2C(C)C(=O)OC3(C)CCC(C(=C)CC4C1C2C3O4)O                                            |
| N1048 | N | 1.33312994<br>2 | C([C@@H]1[C@H]([C@@H]([C@H]([C@H](Oc2cc(c3C(C(=C(c4ccc(c4)O)O)Oc3c2)O)=O)O)O1)O)O)O                |
| N1049 | N | 1.33645973<br>4 | CC1C(C(C(C(O1)OC1C(c2ccc(cc2)O)Oc2cc(cc(c2C1=O)O)O)O)O)O                                           |

|       |   |             |                                                                                                        |
|-------|---|-------------|--------------------------------------------------------------------------------------------------------|
| N1050 | N | 1.339025844 | -<br>[H][C@]12C(C)C(C=C(C)[C@]1(C)CC([C@@H](C)[C@]2(C)CC[C@H](C)CC(O)=O)(O)O)=O                        |
| N1051 | N | 1.342422681 | -<br>[H][C@@]12CCc3cc4c(cc3[C@]1(C(c1ccc3c(C=CC(C)(C)O3)c1O2)=O)O)OCO4                                 |
| N1052 | N | 1.342422681 | -<br>CC(C)=CC(c1c(C)c2c(c(c1OC)O)OC(c1c(C)cc(c(C=O)c1O2)O)=O)=O                                        |
| N1053 | N | 1.352182518 | -<br>[H]c1cc(cc2c1C(C(=CO2)c1cc([H])c(c(CCC=C(C)C)c1)OC)=O)O                                           |
| N1054 | N | 1.355920837 | -<br>CCC=CC(CC)CC=CC1(CC)CC(CC)C(CC(=O)OC)O O1                                                         |
| N1055 | N | 1.35836451  | -<br>CC1C(c2cc3c(cc2c2cccc(c12)N)OCO3)=O                                                               |
| N1056 | N | 1.360418472 | -<br>CC1C2CCC(C)(C3C2C2C(C)(CCC(C(=C)CC3O2)O)OC1=O)OC(C)=O                                             |
| N1057 | N | 1.361727836 | -<br>CC1CC(C2(COC(C)=O)C(CCCC23CO3)C1(C)CCC1COC(C=1)=O)OC(C)=O                                         |
| N1058 | N | 1.36512252  | -<br>CC(=C)C(=O)OC1CC23C(CCC(COC2O)=CC2C1C(=C)C(=O)O2)O3                                               |
| N1059 | N | 1.367542274 | -<br>C[C@H]1[C@@H]([C@H]([C@H]([C@@H](O1)O[C@H]1C(c2c(cc(cc2O[C@@H]1c1ccc(c(c1)O)O)O)O)=O)O)O)O        |
| N1060 | N | 1.371499665 | -<br>[H]c1cc(C=CC(=O)OC[C@@]2(C)CCC[C@@]3(C)[C@]([H])(CC[C@H](C)CC(O)=O)C(=C)[C@@H](C[C@]23[H])O)ccc1O |
| N1061 | N | 1.374748346 | -<br>CC(CO)=CCc1c(cc2c(C(C(CO2)c2ccc(cc2O)O)=O)c1O)O                                                   |
| N1062 | N | 1.376576957 | -<br>C([C@@H]1[C@H]([C@@H]([C@H]([C@H](c2c(cc3c(Cc4cc(c(cc4O3)O)O)=O)c2O)O)O1)O)O)O)O                  |
| N1063 | N | 1.380211242 | -<br>CCOC(CC(C=C)=CC[C@H]1C(=C)CCC2C(C)(C)CC[C@]12C)OCC                                                |
| N1064 | N | 1.380979773 | -<br>CCCCC=CC=CC(NCC(C)C)=O                                                                            |
| N1065 | N | 1.383399246 | -<br>CCCCC=CC=CC(NCC(C)C)=O                                                                            |

|       |   |             |        |                                                                                                                          |
|-------|---|-------------|--------|--------------------------------------------------------------------------------------------------------------------------|
| N1066 | N | 1.389166084 | -<br>4 | CC(C)(C(COc1ccc2c(c3ccoc3nc2c1OC)OC)O)O                                                                                  |
| N1067 | N | 1.389166084 | -<br>4 | CC(C)(C(COc1ccc2c(c3ccoc3nc2c1OC)OC)O)O                                                                                  |
| N1068 | N | 1.389166084 | -<br>4 | CC1C(C(C(C(O1)OC1CCC2(C)C(CCC3(C)C2C=CC24C5CC(C)(C)CCC5(CO4)C(CC23C)O)C1(C)CO)O)O)C1C(C(C(C(CO)O1)O)O)OC1C(C(C(CO1)O)O)O |
| N1069 | N | 1.390935107 | -<br>7 | CC1(CCC2C(C1)=CCC1C(C)(C)C(CCC12C)O)C=C                                                                                  |
| N1070 | N | 1.391366611 | -<br>1 | C1CCN2C3CC4(C2C1)C(C=C3)=CC(=O)O4                                                                                        |
| N1071 | N | 1.392696953 | -<br>3 | COc1cc(c2C(=CC(=O)Oc2c1)c1ccc(c(c1)O)OC)OC1C(C(C(C(CO)O1)O)O)O                                                           |
| N1072 | N | 1.392725984 | -<br>4 | COc1cc2cc3COC(c3c(c3ccc4c(c3)OCO4)c2cc1OC)=O                                                                             |
| N1073 | N | 1.394451681 | -<br>1 | COc1cc(c(cc1C1=COc2cc(cc(c2C1=O)O)O)O)OC                                                                                 |
| N1074 | N | 1.397940009 | -<br>9 | [H]C1=C(C(C=C(CC(C)(C)O)NC1=O)=O)O                                                                                       |
| N1075 | N | 1.397940009 | -<br>9 | C(C1C(C(C(C(OCC2C(C(C(C(O2)OC2=Cc3c4c(ccn3)c3cccc3n4C2=O)O)O)O)O1)O)O)O)O                                                |
| N1076 | N | 1.397940009 | -<br>9 | CC(C)(CC1=CC(C(=C(C(N1)=O)[Cl]O)=O)O                                                                                     |
| N1077 | N | 1.397940009 | -<br>9 | CC1(C)CCCC2(C)C1CCC1(CO1)C2CC=C(CC=O)C=O                                                                                 |
| N1078 | N | 1.401240165 | -<br>5 | CC(=C)C1CCC2(C)CCC(C(C)=C2C1)=O                                                                                          |
| N1079 | N | 1.401400541 | -<br>1 | [H][C@]12C[C@@]3(C)C(C=CC[C@]3([H])CC1=C(C)C(=O)O2)=O                                                                    |
| N1080 | N | 1.408239965 | -<br>5 | CC(C)c1ccc2c(CCC3C(C)(CCCC23C)CO)c1                                                                                      |
| N108  | N | -           | -      | CC(C)=CCc1c(ccc2C(C3(C(COc4cc5c(cc34)OCO5)                                                                               |

|           |   |                 |                                                                                                                   |
|-----------|---|-----------------|-------------------------------------------------------------------------------------------------------------------|
| 1         |   | 1.41161970<br>6 | Oc12)O)=O)OC                                                                                                      |
| N108<br>2 | N | 1.41329976<br>4 | COc1cc(c2C(=CC(=O)Oc2c1)c1ccc(c(c1)O)O)OC1C(C(C(C(CO)O1)O)O)O                                                     |
| N108<br>3 | N | 1.41497334<br>8 | C[C@@]1(C)CCC[C@]2(C)[C@@H](C3C=C(CC(O)OO3)C=O)C(=C)CC[C@@H]12                                                    |
| N108<br>4 | N | 1.41915885<br>5 | CC(C)=CCc1c(cc(C=Cc2ccc(cc2O)O)cc1O)O                                                                             |
| N108<br>5 | N | 1.41967192<br>2 | CC(C)(C=C)C1=Cc2c(c3C=CC(C)(C)Oc3c(c2OC1=O)C(C)(C)C=C)O                                                           |
| N108<br>6 | N | 1.42324587<br>4 | C(C1[C@H](C(C([C@H](c2c(cc3c(C(c4cc(c(cc4O3)O)O)=O)c2O)O)O1)O)OC(c1ccc(cc1)O)=O)O)O                               |
| N108<br>7 | N | 1.42674149<br>8 | [H][C@]12CC[C@@]3(C)[C@H](c4ccco4)OC([C@@H]4[C@@]3([C@]1(C)C(C[C@@]1(C)C(C)(C)O[C@@H](CC(=O)OC)[C@@]12CO)=O)O4)=O |
| N108<br>8 | N | 1.43136376<br>4 | CC1(C)C=Cc2c(ccc3C(C(=COc23)c2cc(c(cc2OC)OC)OC)=O)O1                                                              |
| N108<br>9 | N | 1.43837687      | CN1CCC23C4C5C(CC2=O)C(C1)=CCOC5CC(N4c1cccc13)=O                                                                   |
| N109<br>0 | N | 1.44404479<br>6 | COc1c2c3cccc3C(c3c2c(ccn3)c(c1OC)OC)=O                                                                            |
| N109<br>1 | N | 1.44715803<br>1 | CC(CCCC(C)(C)O)=CCc1c2C(c3c(cc(cc3Oc2cc(c1OC)O)O)O)=O                                                             |
| N109<br>2 | N | 1.45045984<br>5 | CCC1CC2(CC)C3C1C(C(C)O)OOC3(CC)C(=CC(=O)OC)O2                                                                     |
| N109<br>3 | N | 1.47051402<br>8 | CC=C1CN2CCC34C2CC1C(CO)C3N(C(C)=O)c1cccc14                                                                        |
| N109<br>4 | N | 1.47421626<br>4 | C1=C(c2cccc2)Oc2cc(cc(c2C1=O)O)O                                                                                  |
| N109<br>5 | N | 1.47567118<br>8 | CN1c2c(cccc2O)C(c2c(cc(c(c12)OC)OC)O)=O                                                                           |
| N109<br>6 | N | 1.47712125<br>5 | C1=C(c2ccc(cc2)O)Oc2c(C1=O)c(cc(c2c1c(cc(c2C(C=C(c3ccc(cc3)O)Oc12)=O)O)O)O)O                                      |

|       |   |             |                                                                                                |
|-------|---|-------------|------------------------------------------------------------------------------------------------|
| N1097 | N | 1.477907297 | -<br>CC1CCC2C1CC1(C)CC=C(C(C)C(C(C=C(C)C(O)=O)O)O)C1CC=C2C(O)=O                                |
| N1098 | N | 1.478984506 | -<br>C=C(CO)C(=O)OC1CC23C(CCC(COC2O)=CC2C1C(=C)C(=O)O2)O3                                      |
| N1099 | N | 1.48128478  | -<br>CC1(C)C=Cc2c(cc(C=Cc3ccc(cc3O)O)cc2O1)O                                                   |
| N1100 | N | 1.481442629 | -<br>C[C@H]1CC[C@@H]2[C@@H](C)C[C@H]3[C@@H]4C(C)(C)C(C([C@]4(C)C([C@@]23C1=O)=O)=O)=O          |
| N1101 | N | 1.481619031 | -<br>CC(C)(C=Cc1c(cc(c2C=CC(=O)Oc12)OC)OC)O                                                    |
| N1102 | N | 1.486268106 | -<br>CC(C)(C=C)c1c2c(C=CC(=O)O2)c(c2C=CC(C)(C)Oc12)OC                                          |
| N1103 | N | 1.491361694 | -<br>CC1(C)CCC2(C)CCC3(C)C4CC=C5C(CCC(C5(C)C)O)C4(C)CCC3(C)C2C1                                |
| N1104 | N | -1.4915523  | -<br>CCC(CC1(CC)C=C(CC)C(=CC(=O)OC)O1)C=CC(C)O                                                 |
| N1105 | N | 1.497087275 | -<br>CC1CC2C(CC=C1CCC(C)=O)C(=C)C(=O)O2                                                        |
| N1106 | N | 1.50242712  | -<br>CC1C[C@@]23C(C=C(C)C([C@@]34[C@@H](C[C@H](C)[C@H]4CC[C@@H]2C)C=1)=O)O)=O                  |
| N1107 | N | 1.51315757  | -<br>COc1c(C=O)c(cc2C(c3ccccc3C(c12)=O)=O)O                                                    |
| N1108 | N | -1.5132176  | -<br>COc1cc2CCN3Cc4c(CC3c2cc1OC)ccc(c4OC)OC                                                    |
| N1109 | N | 1.51851394  | -<br>CC1(C)CCc2c(ccc3C[C@@H](COc23)c2ccc(c(c2OC)O)OC)O1                                        |
| N1110 | N | 1.518714796 | -<br>[H][C@@]12CCC(=C)[C@@]([H])(CC[C@H](C)CCOC(C=Cc3ccc(c(c3)O)O)=O)[C@]2(C)CCC[C@]1(C)C(O)=O |
| N1111 | N | 1.520964492 | -<br>CC=C(C)C(=O)OC(C)c1cc2C=CC(C)(C)Oc2cc1OC                                                  |
| N1112 | N | 1.522444234 | -<br>CC1(C)C=Cc2c(ccc3C(C4=C(COC5cc6c(cc45)OCO6)Oc23)=O)O1                                     |
| N1113 | N | 1.522444234 | -<br>CC1(C)C=Cc2c(ccc3CC(COC23)c2ccc(c(c2OC)O)OC)O1                                            |
| N1114 | N | -           | -<br>CC(C)=CCc1c(cc(C=Cc2ccccc2)cc1OC)O                                                        |

|       |   |             |                                                                                                   |
|-------|---|-------------|---------------------------------------------------------------------------------------------------|
| 4     |   | 1.53529412  |                                                                                                   |
| N1115 | N | 1.556302501 | CC1CCC2(CCC3(C)C(=CCC4C5(C)CCC(C(C)(C)C5CCC34C)O)C2C1C)C(O)=O                                     |
| N1116 | N | 1.57054294  | CC#CC#CC#Cc1ccccc1                                                                                |
| N1117 | N | 1.576248058 | Cc1c2c(ccn1)c1ccc(cc1[nH]2)OC                                                                     |
| N1118 | N | 1.578595044 | CC(=O)OC1CC2C(C)(C=CC(=O)OC2(C)C)C2C(CC3(C)C(c4ccoc4)OC(C4C3(C12C)O4)=O)O                         |
| N1119 | N | 1.579783597 | CCC=CCC=CCC=CCCC(NCCc1ccc(cc1)O)=O                                                                |
| N1120 | N | 1.595496222 | c1ccc(cc1)C1=C(C(c2c(cc(cc2O1)O)O)=O)O                                                            |
| N1121 | N | 1.602059991 | C(C1[C@H](C(C([C@H](c2c(cc3c(C(c4cc(c(cc4O3)O)O)=O)c2O)O)O1)O)O)OC(C=Cc1ccc(cc1)O)=O              |
| N1122 | N | 1.605305046 | CN1CCc2cc(c(cc2C1Cc1cc(c(cc1Oc1cc2CC3c4c(CC3C)cc(c4c2cc1OC)OC)OC)OC)OC)OC                         |
| N1123 | N | 1.611723308 | COc1ccc2C(C=C(c3ccccc3)Oc2c1OC)=O                                                                 |
| N1124 | N | 1.612783857 | C[C@H]1C[C@H]2C[C@@H](C)[C@](C)([C@H]3CC[C@H]4[C@H]([C@H]23)[C@@H]1CC[C@]4(C)NC=O)NC=O            |
| N1125 | N | 1.613841822 | CCC1CN2CCc3c4ccccc4[nH]c3C2CC1C(=COC)C(=O)OC                                                      |
| N1126 | N | 1.615950052 | CC=C1CN2CC[C@@]34C(=C(C(=O)OC)[C@H]1C[C@@H]24)Nc1ccccc13                                          |
| N1127 | N | 1.622707889 | [H][C@@]1(CC[C@H](C)CC(O)=O)C(=C)[C@@H](C[C@]2([H])[C@](C)(CCC[C@@]12C)COC(C=Cc1ccc(c(c1)O)O)=O)O |
| N1128 | N | 1.625089987 | CC1COC2=C1C(C(c1c2ccc2c1CCCC2(C)C)=O)=O                                                           |
| N1129 | N | 1.632659713 | CC1=CC(Nc2c1c(c1ccc(c(c1c2OC)OC)OC)OC)=O                                                          |
| N113  | N | -           | CCC=CCC=CCCC=CC=CC(NCC(C)C)=O                                                                     |

|           |   |                 |                                                                                   |
|-----------|---|-----------------|-----------------------------------------------------------------------------------|
| 0         |   | 1.63346845<br>6 |                                                                                   |
| N113<br>1 | N | 1.63865929<br>6 | [H][C@]12C(C)C(=[H])C=C(C)[C@]1(C)C[C@]([H])([C@@H](C)[C@]2(C)CC[C@H](C)CC(O)=O)O |
| N113<br>2 | N | 1.64246452      | COc1c2c(cc3c1c1C(CO)Oc4cc(ccc4c1o3)O)OCO2                                         |
| N113<br>3 | N | 1.64345267<br>7 | C=CC1C(OC=C2C(=O)OCCC12O)OC1C(C(C(C(CO)O1)O)O)O                                   |
| N113<br>4 | N | 1.64664947<br>7 | COc1ccc(cc1)C1=CC(c2c(cc(cc2O1)O)O)=O                                             |
| N113<br>5 | N | 1.65041213<br>3 | CCCCCCC1=C(CC(CCCCC)OC1=O)O                                                       |
| N113<br>6 | N | 1.65321251<br>4 | CCCCCCCCC(C)CC(NCCc1ccc(cc1)O)=O                                                  |
| N113<br>7 | N | 1.66275783<br>2 | COc1cc(c2C(C=C(c3ccc(c(c3)O)O)Oc2c1)=O)O                                          |
| N113<br>8 | N | 1.67329744      | COc1ccc(cc1)C1=CC(c2c(cc(c(c3cc(ccc3O)C3=CC(c4c(cc(cc4O3)OC)O)=O)c2O1)O)O)=O      |
| N113<br>9 | N | 1.68124123<br>7 | C1=C(c2ccc(cc2)O)Oc2c(C3C(c4ccc(cc4)O)Oc4cc(cc4C3=O)O)O)c(cc(c2C1=O)O)O           |
| N114<br>0 | N | 1.68124123<br>7 | CC1(C)CCC[C@@]2(C)C1CCC(=C)[C@@H]2CC=C(C=O)C=O                                    |
| N114<br>1 | N | 1.68202718<br>5 | Cc1cc2C(c3ccccc3C(c2c(c1O)OC)=O)=O                                                |
| N114<br>2 | N | 1.69548167<br>7 | COc1ccc(cc1)C1=CC(c2c(cc(c(c3cc(ccc3O)C3=CC(c4c(cc(cc4O3)O)O)=O)c2O1)O)O)=O       |
| N6        | N | 1.69897000<br>4 | C[C@@]12CCC[C@]3(C)c4cc5C(C=C(C(c5cc4C([C@]([C@H]23)(O)OC1)=O)=O)OC)=O            |
| N8        | N | 1.69897000<br>4 | C[C@@]12CCC[C@]3(C)c4cc5C(C=CC(c5cc4C([C@]([C@H]23)(O)OC1)=O)=O)=O                |
| N114<br>3 | N | 1.69897000<br>4 | C1Cc2ccc(cc2OC1c1ccc2c(c1)OCO2)O                                                  |
| N114      | N | -               | COc1cc(c2C(c3c(ccc(c3O)O)Oc2c1)=O)O                                               |



|           |   |                 |                                                                                           |
|-----------|---|-----------------|-------------------------------------------------------------------------------------------|
| 7         |   | 1.69897000<br>4 |                                                                                           |
| N114<br>4 | N | 1.69897000<br>4 | <chem>COc1cc(c2C(c3c(ccc(c3O)OC)Oc2c1)=O)O</chem>                                         |
| N114<br>5 | N | 1.69897000<br>4 | <chem>COc1cc(c2C(c3c(ccc(c3OC)OC)Oc2c1)=O)O</chem>                                        |
| N114<br>6 | N | 1.69897000<br>4 | <chem>COc1ccc(CC(CO)(C=C)Cc2ccc(cc2)O)O)c(c1)O</chem>                                     |
| N114<br>8 | N | 1.70500795<br>9 | <chem>C1=C(c2ccc(c(c2)c2c(cc(c3C(C=C(c4ccc(cc4)O)Oc23)=O)O)O)O)Oc2cc(cc(c2C1=O)O)O</chem> |
| N114<br>9 | N | 1.70880701<br>3 | <chem>CC(CC(C=C(C)C)c1ccc2cc[nH]c2c1)c1c[nH]c2cc(CC=C(C)C)ccc12</chem>                    |
| N115<br>0 | N | 1.71600334<br>4 | <chem>CC(C)=CCCC(C)=CCO</chem>                                                            |
| N115<br>1 | N | 1.71850168<br>9 | <chem>COc1cc2CC3c4cc(c(cc4CCN3Cc2cc1OC)OC)OC</chem>                                       |
| N115<br>2 | N | 1.72427587<br>- | <chem>CN1c2cccc2C(c2c1c(c(c2OC)OC)OC)OC)=O</chem>                                         |
| N115<br>3 | N | 1.73239376<br>- | <chem>CC1C(C)(CC(C2C(C)(C)O2)=O)C2=C(c3c(C)cccc3OC2=O)O1</chem>                           |
| N115<br>4 | N | 1.73239376<br>- | <chem>Cc1cccc2c1C1=C(C(=O)O2)[C@](C)(CC(C2C(C)(C)O2)=O)[C@H](C)O1</chem>                  |
| N115<br>5 | N | 1.74364609<br>1 | <chem>CC(C)(CCc1c(cc(c2C=CC(=O)Oc12)OC)OC)O</chem>                                        |
| N115<br>6 | N | 1.75511226<br>6 | <chem>CN1c2cc3c(c(c2C(c2cccc(c12)OC)=O)OC)OCO3</chem>                                     |
| N115<br>7 | N | 1.75815462<br>2 | <chem>c1c(cc(c(c1O)O)O)C1=C(C(c2c(cc(cc2O1)O)O)=O)O</chem>                                |
| N115<br>8 | N | 1.76042248<br>3 | <chem>COc1ccc(C2Cc3ccc4c(cco4)c3OC2)c(c1O)OC</chem>                                       |
| N115<br>9 | N | 1.76267856<br>4 | <chem>CN1c2cc3c(c(c2C(c2ccc(c(c12)OC)OC)=O)OC)OCO3</chem>                                 |
| N116<br>0 | N | 1.76342799<br>- | <chem>COc1ccc(c(c1O)OC)[C@H]1Cc2ccc3c(cco3)c2OC1</chem>                                   |

|           |   |                 |                                                                                                                                                                |
|-----------|---|-----------------|----------------------------------------------------------------------------------------------------------------------------------------------------------------|
|           |   | 4               |                                                                                                                                                                |
| N116<br>1 | N | 1.76779965<br>7 | <chem>CC(=C)C1CCC2(C)CCC3(C)C(CCC4C5(C)CCC(C(C)(C)C5CCC34C)O)C12</chem>                                                                                        |
| N116<br>2 | N | 1.77085201<br>2 | <chem>COc1c2ccccc2nc2c1cco2</chem>                                                                                                                             |
| N21       | N | 1.77815125      | <chem>CC(C)(CO)C(C(NCCCO)=O)O</chem>                                                                                                                           |
| N116<br>3 | N | 1.78031731<br>2 | <chem>CC(=O)Oc1ccc(cc1OC(C)=O)C1=CC(=O)Oc2cc(cc(c12)OC(C)=O)OC</chem>                                                                                          |
| N116<br>4 | N | 1.78145471<br>3 | <chem>C[C@H]1[C@H](C)[C@@H](c2ccc3c(c2)OCO3)O[C@@H]1c1ccc(c(c1)OC)O</chem>                                                                                     |
| N116<br>5 | N | 1.78175537<br>5 | <chem>C[C@H]1[C@H](C)[C@@H](c2ccc3c(c2)OCO3)O[C@@H]1c1ccc(c(c1)OC)O</chem>                                                                                     |
| N116<br>6 | N | 1.78946538<br>3 | <chem>C1=Cc2ccccc2OC1=O</chem>                                                                                                                                 |
| N116<br>7 | N | 1.79669537      | <chem>CC1(C)C(CC[C@@]2(C)[C@H]1CC[C@]1(C)[C@@H]2CC([C@@H]2[C@@]3(C)CC[C@@]([C@H]3[C@H](C[C@@]12C)O[C@@H]1[C@H]([C@@H]([C@@H](CO1)O)O)O)(C(C)(C)O)O)O)=O</chem> |
| N116<br>8 | N | 1.80617997<br>4 | <chem>C1=C(c2ccc(c(c2)O)O)Oc2c(C1=O)c(cc(c2[C@@H]1C(c2c(cc(cc2O[C@H]1c1ccc(cc1)O)O)O)=O)O)O</chem>                                                             |
| N116<br>9 | N | 1.81480700<br>8 | <chem>CC(C)=CC(CC(C)=C[C@@H]([C@@H]1COC(C1=C)=O)OC(C)=O)=O</chem>                                                                                              |
| N117<br>0 | N | -1.8162413      | <chem>C1=C(c2ccccc2)Oc2cc(ccc2C1=O)O</chem>                                                                                                                    |
| N117<br>1 | N | 1.81888541<br>5 | <chem>C1=C(c2ccccc2)Oc2cccc(c2C1=O)O</chem>                                                                                                                    |
| N117<br>2 | N | 1.81954393<br>6 | <chem>CC(=C)C1CCC(C)=CC1</chem>                                                                                                                                |
| N117<br>3 | N | 1.82216807<br>9 | <chem>CCC1CN2CCc3c4ccccc4[nH]c3C2CC1C(=COC)C(=O)OC</chem>                                                                                                      |
| N117<br>4 | N | 1.82410610<br>8 | <chem>CN1CCc2cc(c3cc2C1Cc1ccc(c(c1)Oc1ccc(CC2c4c(CN2C)cc(c(c4O3)O)OC)cc1)OC)OC</chem>                                                                          |
| N117      | N | -               | <chem>[H][C@@]12CC=CC([C@]2(C)C[C@]2(C(C1)=C(C)C</chem>                                                                                                        |

|           |   |                           |                                                                                                                                                               |
|-----------|---|---------------------------|---------------------------------------------------------------------------------------------------------------------------------------------------------------|
| 5         |   | 1.82801506<br>4           | (=O)O2)O)=O                                                                                                                                                   |
| N117<br>6 | N | -<br>1.83197113           | CC1(C)C(CC[C@@]2(C)[C@H]1CC[C@]1(C)[C@@<br>H]2CC([C@@H]2[C@@]3(C)CC[C@@]([C@H]3[C@<br>H](C[C@@]12C)O[C@@H]1[C@H]([C@@H]([C@@<br>H](CO1)O)O)O)(C(C)(C)O)O)O)=O |
| N117<br>7 | N | -<br>1.83505610<br>2      | CC(C)C1CCC(C)(C2C1c1c(cc(c(CCC3cccc3)=O)c<br>1O2)O)OC)O                                                                                                       |
| N117<br>8 | N | -<br>1.83671051<br>4      | C[C@@]1(CCC2C1[C@H](OC1C(C(C(C(COC(C=Cc<br>3ccc(cc3)O)=O)O1)O)O)O)[C@H](C=2C(=O)OC)O<br>C)O                                                                   |
| N117<br>9 | N | -<br>1.83695673<br>7      | CC=Cc1ccc(cc1)OC(C(C)C)=O                                                                                                                                     |
| N118<br>0 | N | -<br>1.84509804           | CCc1ccc(cc1)OC(C=C)=O                                                                                                                                         |
| N118<br>1 | N | -<br>1.86510397<br>5      | COC1=C(c2ccc(c(c2)OC)OC)Oc2cc(cc(c2C1=O)O)O<br>C                                                                                                              |
| N118<br>2 | N | -<br>1.86671228<br>2      | CC(=O)O[C@@H]1C(c2c(cc(cc2O[C@@H]1c1ccc(c<br>c1)O)O)O)=O                                                                                                      |
| N118<br>3 | N | -<br>1.86948136<br>4      | CC(=O)OC1CC(C2(C)c3cc4c(cc4)c(C)c3CCC2(C1(<br>C)C)O)OC(C)=O                                                                                                   |
| N118<br>4 | N | -<br>1.87448181<br>8      | COc1ccc(cc1)C1=CC(c2c(cc(c(c2O)OC)OC)O1)=O                                                                                                                    |
| N118<br>5 | N | -<br>1.87890506<br>4      | CC(C)=CC(CC(C)=CC(C1COC(C1=C)=O)O)=O                                                                                                                          |
| N118<br>6 | N | -<br>1.90902085<br>4      | COC=C(C1CC2c3c(CCN2CC1C=C)c1cccc1[nH]3)C<br>(=O)OC                                                                                                            |
| N118<br>7 | N | -<br>1.91009054<br>6      | C(C(C(O)=O)N)c1c[nH]c2cccc12                                                                                                                                  |
| N118<br>8 | N | -<br>1.91193154<br>9      | [H]C(C(CC(O)=O)=CC[C@H]1C(=C)CCC2C(C)(C)C<br>CC[C@]12C)=O                                                                                                     |
| N118<br>9 | N | -<br>1.96275207<br>9<br>2 | CC1C2CCC3C(C)(CCCC3(C)C(=O)OC)C2Cc2c1cco                                                                                                                      |
| N119<br>0 | N | -<br>1.99961911           | C1Oc2cc3cc(c4ccc(cc4O)O)oc3cc2O1                                                                                                                              |

|           |   |                 |                                                                                                                   |
|-----------|---|-----------------|-------------------------------------------------------------------------------------------------------------------|
|           |   | 4               |                                                                                                                   |
| N119<br>1 | N | 2.00160392<br>4 | <chem>CC(=O)O[C@H]1[C@H]([C@@]2(C)C3=CC[C@@H](c4ccoc4)[C@]3(C)CC[C@@H]2[C@@]2(C)C(C=C[C@@H]([C@H]12)O)=O)O</chem> |
| N119<br>2 | N | 2.00513873<br>4 | <chem>CC1CC2C(CC=C1C(CC(C)=O)OC(C)=O)C(=C)C(=O)O2</chem>                                                          |
| N119<br>3 | N | 2.00548081      | <chem>CC(C)C1CCC2(C)CC1c1c(cc(c(C(Cc3ccccc3)=O)c1O2)O)OC</chem>                                                   |
| N119<br>4 | N | 2.00860017<br>2 | <chem>CN1c2ccccc2C(c2c1c1ccccc1[nH]2)=O</chem>                                                                    |
| N119<br>5 | N | 2.01577875<br>6 | <chem>C1=C(C(c2ccc(cc2O1)O)=O)c1ccc(cc1)O</chem>                                                                  |
| N119<br>6 | N | 2.01845317<br>8 | <chem>CC(C)=CCc1ccc2CC(Nc2c1)=O</chem>                                                                            |
| N4        | N | 2.02734960<br>8 | <chem>C[C@@]12CCC[C@@](C)(C(O)=O)[C@H]1CC[C@@]13CC(=C)[C@H](CC[C@@H]23)C1</chem>                                  |
| N119<br>7 | N | 2.04296907<br>3 | <chem>c1cc(C2=C(C(c3c(cc(cc3O2)O)O)=O)O)c(cc1O)O</chem>                                                           |
| N119<br>8 | N | 2.06032002<br>9 | <chem>CC1=CC(CC2C(C)(CCC3=CCOC3=O)C(CCC12C)CO)=O</chem>                                                           |
| N119<br>9 | N | 2.06445798<br>9 | <chem>CC1C2=COC=CC2=C(C=O)C(=O)O1</chem>                                                                          |
| N120<br>0 | N | 2.06872641<br>9 | <chem>CC1=C2C(CCN1)=c1ccc(cc1=N2)OC</chem>                                                                        |
| N120<br>1 | N | 2.07918124<br>6 | <chem>COc1cc(c2C(CC(c3ccccc3)Oc2c1)=O)O</chem>                                                                    |
| N120<br>2 | N | 2.08774617<br>8 | <chem>CC1(C)C2CC(C3(C)C(CCC4(C)C(C(C=C34)=O)c3ccoc3)C2(C)C=CC1=O)O</chem>                                         |
| N120<br>3 | N | 2.11058971      | <chem>CC=C1CN2CCC34C2CC1C(CC=O)=C3Nc1ccccc14</chem>                                                               |
| N120<br>4 | N | 2.13672056<br>7 | <chem>CC(CCC=C(C)CCC(C(C)(C)O)O)=CCCC=C(C)CCC=C(C)CCC(C(C)(CO(C)=O)O)O</chem>                                     |
| N120<br>5 | N | 2.13987908      | <chem>CC=C1CN2C3CC1C1(C2CC2(C3N(C)c3ccccc23)C1O)C(=O)OC</chem>                                                    |

|       |   |             |                                                                                      |
|-------|---|-------------|--------------------------------------------------------------------------------------|
|       |   | 6           |                                                                                      |
| N1206 | N | 2.149219113 | <chem>C1C(c2ccc(cc2)O)Oc2cc(cc(c2C1=O)O)O</chem>                                     |
| N1207 | N | 2.192650338 | <chem>COc1cc(c2c(c1)c(c1ccoc1n2)OC)OC</chem>                                         |
| N16   | N | 2.217483944 | <chem>C1C2C(c3ccc(cc3O1)O)Oc1cc3c(cc12)OCO3</chem>                                   |
| N1208 | N | 2.221468359 | <chem>COc1ccc(cc1O)C1=COc2cc(cc(c2C1=O)O)O</chem>                                    |
| N1209 | N | 2.242517044 | <chem>CC(=C)C(CCC(C)=O)C=CC1=C(C)C(O)OC1=O</chem>                                    |
| N1210 | N | 2.245248936 | <chem>COc1ccc(cc1)C1=COc2cc(cc(c2C1=O)O)O</chem>                                     |
| N1211 | N | 2.255272505 | <chem>CC(=CCO)C1CC2C(C)(C)C(C=CC2(C)OO1)=O</chem>                                    |
| N1212 | N | 2.270407479 | <chem>COc1ccc(cc1)C1=COc2cc(ccc2C1=O)O</chem>                                        |
| N10   | N | 2.301029996 | <chem>C=CC1C(OC=C2C1=CCOC2=O)OC1C(C(C(C(CO)O1)O)O)O</chem>                           |
| N1213 | N | 2.301029996 | <chem>COC(C1C2CC3c4c(CCN3CC2CCC1O)c1cccc1[nH]4)=O</chem>                             |
| N1214 | N | 2.342422681 | <chem>C=CC1C(OC=C2C1=CCOC2=O)OC1C(C(C(C(CO)O1)O)O)O</chem>                           |
| N1215 | N | 2.344392274 | <chem>C=CC1C2CCOC(C2=COC1OC1C(C(C(C(CO)O1)O)O)O)=O</chem>                            |
| N1216 | N | 2.359835482 | <chem>c1ccc2c(c1)cc1c(c3ccccc3[nH]1)n2</chem>                                        |
| N1217 | N | 2.409806333 | <chem>CN1CCc2cc(c3cc2C1Cc1ccc(cc1)Oc1cc(CC2c4c(CC2C)cc(c(c4O3)OC)OC)ccc1OC)OC</chem> |
| N1218 | N | 2.468047733 | <chem>CN1(C)C[C@@H](C[C@H]1C(O)=O)OC(C=Cc1ccc(cc1)O)=O</chem>                        |
| N121  | N | -           | <chem>CN1CCc2cc(c3cc2C1Cc1ccc(cc1)Oc1c2C(Cc4ccc(c</chem>                             |

|           |   |                      |                                                                         |
|-----------|---|----------------------|-------------------------------------------------------------------------|
| 9         |   | 2.54777470<br>5      | c4)O3)O)N(C)CCc2cc(c1O)OC)OC                                            |
| N122<br>0 | N | -<br>2.76902589      | C1CO[C@H]2C=C(CO)[C@@H](CO)[C@@H]12                                     |
| N122<br>1 | N | -<br>2.91474979<br>1 | c1nc2c(C(NC(N2)=O)=O)[nH]1                                              |
| N122<br>2 | N | -<br>2.95036485<br>4 | CN1CCc2cc(c(c3c2C1Cc1ccc(cc1)Oc1c2C(Cc4ccc(c4)O3)N(C)CCc2cc(c1O)OC)O)OC |
| N122<br>3 | N | -<br>3.17048933<br>6 | COc1ccc2CC3c4cc(c(c4CCN3Cc2c1OC)O)OC)OC                                 |
| N122<br>4 | N | -<br>3.24506253<br>9 | COc1c(cc2CCNC3Cc4cccc4c1c23)O                                           |
| N122<br>5 | N | -<br>3.39101459<br>9 | COc1cc2CCN3Cc4c(CC3c2cc1OC)ccc(c4OC)O                                   |
| N122<br>6 | N | -<br>3.71116001<br>4 | COc1ccc2CC3c4c(CCN3Cc2c1OC)cc(c(c4O)OC)OC                               |
| N122<br>7 | N | -<br>3.71636303<br>7 | CN1CCc2cc3c(c4c5ccc(cc5CC1c24)OC)OCO3                                   |
| N122<br>8 | N | -<br>3.71792837<br>6 | COc1cc2CC3c4c(CCN3Cc2cc1OC)cc(c(c4O)OC)OC                               |
| N122<br>9 | N | -<br>3.78010879      | CN1CCc2cc3c(c4c5ccc(cc5CC1c24)O)OCO3                                    |
| N123<br>0 | N | -<br>3.84174633<br>5 | CN1CCc2cc3c(c4c5cc(c(cc5CC1c24)O)OC)OCO3                                |
| N123<br>1 | N | -<br>3.85500571<br>1 | C1CNC2Cc3cccc3c3c2c1cc1c3OCO1                                           |
| N123<br>2 | N | -<br>3.87584748<br>6 | CN1CCc2cc3c(c4c5cc(c(cc5CC1c24)OC)OC)OCO3                               |
| N123<br>3 | N | -<br>3.88571464<br>5 | COc1ccc2c(CC3c4c(CCN3)cc3c(c24)OCO3)c1                                  |
| N123<br>4 | N | -<br>3.94703038<br>4 | CN1CCc2cc3c(c4c5cc(c(cc5CC1c24)OC)O)OCO3                                |
| N123      | N | -                    | COc1cc2C=CC(=O)Oc2c(c1O)OC                                              |

|   |  |                 |  |
|---|--|-----------------|--|
| 5 |  | 4.55363459<br>2 |  |
|---|--|-----------------|--|
