# Supplementary material for: Predictive classifier models built from natural products with antimalarial bioactivity using machine learning approach
Source: PubMed Central journal article supplement (PMC6161899; doi:10.1371/journal.pone.0204644), 2018-09-28
Supplement: pone.0204644.s002.pdf [file pone.0204644.s002.pdf]

**S2 Table.** The antiplasmodial bioactivity class predictions of 450 natural compounds from a private natural product chemical library from InterBioScreen (<http://www.ibscreen.com>) by Sequential Minimization Optimisation (SMO) and Random Forest (RF) classifier models.

| Molecule Name | Smiles                                                                                                  | Class prediction SMO | Class prediction RF |
|---------------|---------------------------------------------------------------------------------------------------------|----------------------|---------------------|
| STOCK1N-00001 | <chem>C[N+](CC1)(Cc(c([C@H]2[C@H]3O)c4)cc5c4OCO5)[C@H]2C1=C[C@H]3O.[I-]</chem>                          | A                    | A                   |
| STOCK1N-00002 | <chem>CC(N[C@@H](CCC(c(C1=CC=C2NCc(cc3)ccc3F)c3OC)cc(OC)c3OC)C1=CC2=O)=O</chem>                         | N                    | A                   |
| STOCK1N-00004 | <chem>COc(cc(CC1(CCCCC1)N=C1)c1c1)c1OC.Cl</chem>                                                        | N                    | A                   |
| STOCK1N-00006 | <chem>CC(C1Oc(cccc2)c2OC1)NC(c(cc1)cc1OCC=C)=O</chem>                                                   | N                    | A                   |
| STOCK1N-00007 | <chem>COc1cc(CN(C/C=C/c2cccc2)CC23CCOCC3)c2cc1OC.Cl</chem>                                              | N                    | A                   |
| STOCK1N-00010 | <chem>CCOC(CCCCCCCCCCc1ncccc1)=O</chem>                                                                 | N                    | N                   |
| STOCK1N-00013 | <chem>CCCCCCCCCO[C@H]([C@H]([C@@H]1OC(C)=O)NC(C)=O)O[C@@H](COC(C)=O)[C@@H]1OC(C)=O</chem>               | A                    | A                   |
| STOCK1N-00022 | <chem>C[C@@H]1[C@@]2(COC(NC3CCCC3)=O)C(C)C=C(C)C1C(c1ccc1)OC2</chem>                                    | N                    | A                   |
| STOCK1N-00024 | <chem>CC(C1Oc(cccc2)c2OC1)NCC1Oc(cccc2)c2OC1.CC(C1Oc(cccc2)c2OC1)NCC1Oc(cccc2)c2OC1.OC(C(O)=O)=O</chem> | A                    | A                   |
| STOCK1N-00026 | <chem>N=C1N=C(c2c(C3)cccc2)N3Cc2c1ccc2.Cl</chem>                                                        | N                    | N                   |
| STOCK1N-00028 | <chem>CC1(C)c(cccc2)c2N(C2)[C@@]1(/C=C/c(cc1)ccc1N(C)C)NC2=O</chem>                                     | A                    | A                   |
| STOCK1N-00030 | <chem>CCOc(cc1)ccc1OC1=COc(cc(cc2OC(C)=O)OC(C)=O)c2C1=O</chem>                                          | A                    | A                   |
| STOCK1N-00031 | <chem>CC(C)C[C@@H](C(NCC(O)=O)=O)NC(C(CC1)N(C(OCc2cccc2)=O)C1=O)=O</chem>                               | A                    | A                   |

|               |                                                                                                                                 |   |   |
|---------------|---------------------------------------------------------------------------------------------------------------------------------|---|---|
| STOCK1N-00032 | <chem>Cc1nc(C2=COc(cc(c(C)c3)OCC(OC)=O)c3C2=O)cs1</chem>                                                                        | A | A |
| STOCK1N-00033 | <chem>C[C@@H](CCC=C(C)C)NCCCN(C)C</chem>                                                                                        | N | A |
| STOCK1N-00034 | <chem>CC(C(C(O)=O)NC(c1cnccc1)=O)O.Cl</chem>                                                                                    | N | A |
| STOCK1N-00036 | <chem>CC1(C)Oc2c(C)ncc(CCl)c2CO1.Cl</chem>                                                                                      | N | N |
| STOCK1N-00039 | <chem>CCCc(c(OC(C)C)c1)cc2c1OC=C(c(cc1)cc3c1OCCO3)C2=O</chem>                                                                   | A | A |
| STOCK1N-00044 | <chem>CCOC([C@H](Cc1c[nH]c2c1cccc2)NC(CCC(OC)=O)=O)=O</chem>                                                                    | A | A |
| STOCK1N-00047 | <chem>CC(C)CC(C(NCC(OC(C)(C)C)=O)=O)NC(C(CC(N)=O)NC(C(Cc1c[nH]cn1)N)=O)=O</chem>                                                | A | A |
| STOCK1N-00048 | <chem>C[C@H](C(OC(cc1)cc(OC(C)=C2c(cc3)cc4c3OCCCO4)c1C2=O)=O)N.Br</chem>                                                        | A | A |
| STOCK1N-00051 | <chem>CC(CC(CCC=C(C)C)=CC1)C1C(OC1)OCC11COC(C2C(C)CC(CCC=C(C)C)=CC2)OC1</chem>                                                  | N | A |
| STOCK1N-00054 | <chem>C(CC1)CC11OC(CCCC2)[C@H]2C2=CCCCC12</chem>                                                                                | N | A |
| STOCK1N-00055 | <chem>C[C@H](CCC([C@]1(C)COC(c2cccc2)=O)[C@]2(C)CC[C@@H]1OC(c1cccc1)=O)[C@@]12O[C@@](CCOC(c2cccc2)=O)(COC(c2cccc2)=O)CC1</chem> | A | A |
| STOCK1N-00062 | <chem>CCCOc1ccc(CC2=N[C@@](C)(CO)CO2)cc1</chem>                                                                                 | N | A |
| STOCK1N-00064 | <chem>CC(C)(C1CC2CC1)[C@@]2(C)c(ccc1)c1O</chem>                                                                                 | N | A |
| STOCK1N-00067 | <chem>CCCc(c(OC(C)=O)c1)cc2c1OC=C(c1cc(cccc3)c3o1)C2=O</chem>                                                                   | N | N |
| STOCK1N-00068 | <chem>CC1(C)OC(C)(C)O[C@H]1COc1ccc(c(OC)c(cco2)c2n2)c2c1OC</chem>                                                               | A | A |
| STOCK1N-00070 | <chem>CCCCSCC(CN(C[C@@H](C1)CN23)C[C@H]1C3=CC=CC2=O)O</chem>                                                                    | A | A |
| STOCK1N-00074 | <chem>CC(Nc(cc1)cc(O2)c1C(C)=CC2=O)=O</chem>                                                                                    | N | A |
| STOCK1N-00075 | <chem>CCCC(C1)C[N+]2(C)[C@]1(C)C(CCC1)=C1CC2.[I-]</chem>                                                                        | A | A |
| STOCK1N-00080 | <chem>[O-][N+](c1ccc(/C=C(\CCN23)/C3=Nc(cccc3)c3C2=O)cc1)=O</chem>                                                              | A | A |
| STOCK1N-00081 | <chem>CC(C)OC(CC(C(Nc1c2cccc1)=O)=C2O)=O</chem>                                                                                 | N | A |

|               |                                                                                              |   |   |
|---------------|----------------------------------------------------------------------------------------------|---|---|
| STOCK1N-00082 | CC([C@H]1C(N2CCC[N+](C)(C)C)=O)C=C(C)C[C@@H]1C2=O.[I-]                                       | A | A |
| STOCK1N-00090 | CC(N[C@@H](CCc(c(C1=CC=C2NCc(cc3OC)cc(OC)c3OC)c3OC)cc(OC)c3OC)C1=CC2=O)=O                    | N | A |
| STOCK1N-00093 | N[C@@H](CC(O)=O)c1cccc1                                                                      | N | A |
| STOCK1N-00095 | C[C@@](CC[C@@H]([C@H]1CC2)[C@@](C)(CC3)[C@H]2C[C@H]3OC(C)=O)([C@H](CC2)C(CO3)=CC3=O)[C@@]12O | A | A |
| STOCK1N-00096 | CN(CCC1)[C@@H]1c1cccnc1N.I                                                                   | N | A |
| STOCK1N-00099 | CCCC(Oc1c2cc(CC)c(OC(C)C)c1)=C(c(cc1)cc3c1OCCCO3)C2=O                                        | A | A |
| STOCK1N-00101 | CCOC(/C/C#N)=C(/CC1)\[C@@](C)(CC2)C1[C@H]1[C@H]2[C@@](C)(CCCC2)C2CC1=O                       | N | A |
| STOCK1N-00102 | CCOc(cc1)cc(OC(C)=C2Oc(cc3)cc4c3OCCCO4)c1C2=O                                                | N | A |
| STOCK1N-00103 | CCOC(C(C)Oc(cc1OC(C)C(OCC)=O)c(O)c(O)c1C(c1cccc1)=CC2=O)=O                                   | A | A |
| STOCK1N-00105 | Oc(cc1)cc(O)c1C(COc(ccc1)c1Br)=O                                                             | N | A |
| STOCK1N-00106 | CC([C@]1(CCC2)C2C2CC1CC2)N.Cl                                                                | N | A |
| STOCK1N-00108 | NC(C(N1)=O)=C(C(O)=O)NC1=O                                                                   | N | A |
| STOCK1N-00113 | NC(COc(cc1)cc(O2)c1C(CCC1)=C1C2=O)=O                                                         | N | A |
| STOCK1N-00116 | CC(CCC=C(C)C)N(C(C)CCC=C(C)C)C=O                                                             | N | A |
| STOCK1N-00117 | CCCCOC(COc(c(CC)c1)cc(O2)c1C(C)=CC2=O)=O                                                     | N | A |
| STOCK1N-00124 | CC(C)COc1ccc([C@H](C(N2)=O)NC2=O)cc1                                                         | N | A |
| STOCK1N-00126 | C[C@@](CN(C)CC([C@@H](C[C@H]([C@](C)(CCC1)C2)C1=C)[C@@H]2O1)C1=O)(c1cccc1)O                  | N | A |
| STOCK1N-00127 | C[C@@H](C(O)=O)Oc(cc1)cc(OC(C)=C2Oc3cccc3)c1C2=O                                             | A | A |
| STOCK1N-00130 | C/C/CCc(c(C)c1)c(C)c(C)c1OC)=C\C=C\C(C)=O                                                    | N | N |
| STOCK1N-00132 | CC#CCCCCCCC(O)=O                                                                             | N | A |
| STOCK1N-00133 | CC(C)c(cc1)ccc1OC1=C(C)Oc(cc(cc2)OC(C)=O)c2C1=O                                              | A | A |
| STOCK1N-00139 | C[C@@H](CC=C(c1cccc1)c1cccc                                                                  | A | A |

|               |                                                                                 |   |   |
|---------------|---------------------------------------------------------------------------------|---|---|
|               | 1)[C@H](CC1)[C@](C)(CC2)[C@H]1[C@@H]1[C@@H]2[C@](C)(CC[C@H](C2)O)C2=CC1         |   |   |
| STOCK1N-00141 | OC(C(CC(C1C(O)=O)C(O)=O)C1C(O)=O)=O                                             | N | A |
| STOCK1N-00145 | C[N+](C)(C[C@H]1C2)C(CC=C)C1=Cc1c2cccc1.[Br-]                                   | A | N |
| STOCK1N-00146 | CC(C)(C1)OCC[C@]1(CCO)O                                                         | N | A |
| STOCK1N-00147 | CC(C)[C@@H](C(OC)=O)NC(CO(c1c1)cc(OC=C2Oc3cccc3)c1C2=O)=O                       | A | A |
| STOCK1N-00148 | CC(OC(N)=C([C@@]1(c(cccc2)c2N2)C2=O)C(OC)=O)=C1C(OCC=C)=O                       | N | A |
| STOCK1N-00150 | CCOC(C(C1)C2(CC(C)(C)OCC2)OC1=O)=O                                              | N | A |
| STOCK1N-00151 | CC(C)(C(CC1)C2OC1(C)C#N)Oc1c2cccc1                                              | A | A |
| STOCK1N-00154 | CCCOc(cc1)ccc1C(OC[C@@H]1[C@H](CCCC2)[N+]2(C)CCC1)=O.[I-]                       | A | A |
| STOCK1N-00156 | CN(C(SCC(CS[C@H]1[C@H]2N)=C(C(O)=O)N1C2=O)=NC1=O)NC1=O                          | A | A |
| STOCK1N-00157 | CC(C)(CC(C)=C1)[C@@H](C(C)=O)C1=O                                               | N | A |
| STOCK1N-00159 | CCc(c(O)c1)cc2c1OC(C(O)=O)=C(c1nc(C)cs1)C2=O                                    | A | N |
| STOCK1N-00162 | CC(C)(C)OC(N[C@@H](Cc1cccc1)C(Oc(cc1)cc(OC(C)=C2c(cc3)cc4c3OCCCCO4)c1C2=O)=O)=O | A | A |
| STOCK1N-00165 | C[C@](CCC1)(C[C@H]([C@H](C2)C3CN4CCC(Cc5cccc5)CC4)OC3=O)[C@H]2C1=C              | A | A |
| STOCK1N-00166 | COc(cc1)cc(OC(c(cc2)cc3c2OCCCCO3)=C2)c1C2=O                                     | N | A |
| STOCK1N-00167 | O=Cc1ccc(SCCS2ccc(C=O)s2)s1                                                     | A | A |
| STOCK1N-00169 | C(c1cccc1)=C/c1cccc(/C=C/c2cccc2)n1                                             | N | N |
| STOCK1N-00175 | C[C@@H](CCc1cccc1)CCO                                                           | N | A |
| STOCK1N-00178 | Cc1c(C(c2cc(cc(cc3)OC)c3o2)=O)c(cc(cc2)OC)c2o1                                  | N | A |
| STOCK1N-00179 | C[C@@H](CCc(c(OC)c1)cc(OC)c1O)C.N.Cl                                            | N | A |
| STOCK1N-00181 | CC(C)(Cc1c-2cccc1)n1c2nnc1-c1ccnc1                                              | N | A |

|               |                                                                                                                   |   |   |
|---------------|-------------------------------------------------------------------------------------------------------------------|---|---|
| STOCK1N-00185 | CCc(cc1)ccc1OC1=COc(cc(cc2)O)c2<br>C1=O                                                                           | N | A |
| STOCK1N-00188 | CC(C1)N(Cc2c3cccc2)C3c2c1c(cccc<br>1)c1[nH]2.OC(CC(O)=O)(CC(O)=O)<br>C(O)=O                                       | A | A |
| STOCK1N-00192 | COC(CCN(CC1)Cc(cc2OC)c1cc2OC)<br>=O.Cl                                                                            | N | A |
| STOCK1N-00193 | CC(O[C@H])(CO[C@@H]([C@@H]<br>1OC(C)=O)N(C(N2)=S)N=CC2=O)[C<br>@H]1OC(C)=O)=O                                     | A | A |
| STOCK1N-00197 | OC(COc(cc1)cc(OC=C2c3cscn3)c1C<br>2=O)=O                                                                          | A | N |
| STOCK1N-00199 | Oc(cc1O)cc(OC=C2Oc(cc3)ccc3F)c<br>1C2=O                                                                           | N | N |
| STOCK1N-00205 | C[C@](CC1)([C@@](C)(CC2)C1[C@<br>H](CC1)C2[C@@](C)(C=C2)C1=CC2<br>=O)O                                            | N | A |
| STOCK1N-00209 | CC(c(ccc(OCCCCl)c1)c1O1)=CC1=O                                                                                    | N | A |
| STOCK1N-00210 | OC([C@H](C1)NCc2c1cccc2)=O.Cl                                                                                     | N | A |
| STOCK1N-00212 | C[C@@H](C(O)=O)NCc(c(O1)c(cc2<br>)C(CCC3)=C3C1=O)c2O                                                              | N | A |
| STOCK1N-00215 | CC(C)(C)OC(N[C@@H](Cc(cc1)ccc1<br>OC(OC(C)(C)C)=O)C(NCC(OC)=O)=<br>O)=O                                           | N | A |
| STOCK1N-00217 | CC(C)c1c(cc(C)c(-<br>c(c(C)cc(c2c3/C=N/Cc(cccc4)c4O)c<br>(C(C)C)c(O)c3O)c2O)c2O)c2c(/C=N<br>/Cc(cccc2)c2O)c(O)c1O | A | A |
| STOCK1N-00221 | CCCC(C)(C(NC(C1SC(C)(C)C(C([O-<br>])=O)N11)C1=O)=O)OC(CC(C)CC1)<br>C1C(C)C.[Na+]                                  | A | A |
| STOCK1N-00222 | CC(C)(C)OC(CNC(CNC([C@@H](Cc(<br>cc1)ccc1O)NC(OC(C)(C)C)=O)=O)=<br>O)=O                                           | A | A |
| STOCK1N-00225 | O=C1N(CC/C2=C\c3cccc3)/C2=Nc<br>2c1cccc2                                                                          | A | A |
| STOCK1N-00228 | CC(CCC(oc1c2cc(C)cc1)c2-<br>c1ccc(C)cc1)=O                                                                        | N | A |
| STOCK1N-00229 | CCCCCC(C(C)C(C(OCC#C)=O)O1)C1<br>=O                                                                               | A | A |
| STOCK1N-00237 | CC(C)(C1)OCC[C@]1(CC1)C=CC1=O                                                                                     | N | A |
| STOCK1N-00239 | C1C[C@@H](c2cccnc2)NCC1.Cl                                                                                        | N | N |
| STOCK1N-00242 | CCc(c(OC)c1)cc(C(Cc(cc2)cc3c2OC                                                                                   | N | A |

|               |                                                                               |   |   |
|---------------|-------------------------------------------------------------------------------|---|---|
|               | CCO3)=O)c1O                                                                   |   |   |
| STOCK1N-00243 | C1c2cc3ccccc3nc2-c2c1cccc2                                                    | N | N |
| STOCK1N-00244 | C[C@@H](CO)NCCn1c(C(N(C)C(N2C)=O)=O)c2nc1                                     | N | A |
| STOCK1N-00249 | CC1(C)Cc2nc(C)c3[nH]c(cccc4)c4c3c2CC1                                         | N | A |
| STOCK1N-00252 | CCCOc1cc(C)cc(O2)c1C(c1cccc1)=CC2=O                                           | N | A |
| STOCK1N-00253 | O=C(COc(cc1)cc(OC=C2O3ccccc3)c1C2=O)ON(C(CC1)=O)C1=O                          | A | A |
| STOCK1N-00256 | CC([C@@H]1C2)=CC[C@@]2(CO)COC1c(cccc1)c1O                                     | N | A |
| STOCK1N-00258 | OCCNc1ncnc2c1nc[nH]2                                                          | N | A |
| STOCK1N-00259 | CC(C)(Cc(cc(c(OC)c1)OC)c1C1=C/C2=N/O)N1/C2=O                                  | N | A |
| STOCK1N-00262 | CC1(CC(OC)=O)OCC2(CC=C(C)CC2)CO1                                              | N | A |
| STOCK1N-00263 | O=C(c1/c2cccc1)O/C2=C\C=C\c1cccc1                                             | N | N |
| STOCK1N-00265 | CN(C)CC(Nc1c(CCC2)c2nc2cccc12)=O.OC(C(O)=O)=O                                 | A | A |
| STOCK1N-00266 | CC(C)(C1)CC(NC(C)=C([C@@H]2c3ncccc3)C(OC)=O)=C2C1=O                           | N | A |
| STOCK1N-00268 | C[C@@]1(CCC=C(C)C)N(C=O)N=C(CCC=C(C)C)C1                                      | A | N |
| STOCK1N-00270 | NC(CN(CCCC1)C1=O)=O                                                           | N | A |
| STOCK1N-00271 | CN(CCCC1)[C@@H]1c1ccnc1N.Cl                                                   | N | A |
| STOCK1N-00272 | CC(C)=CCCC(CC1C(O)=O)=CCC1C(O)=O                                              | N | A |
| STOCK1N-00273 | CC(C)COc(cc1)ccc1C(N/C(/C(Nc(cc1)ccc1OC)=O)=C/c1cccc1)=O                      | A | A |
| STOCK1N-00274 | C[C@](CC1)([C@@](C)(CC2O)C1C(CC[C@@H](C1)[C@]3(C)CCC1=O)[C@@]23F)O            | N | A |
| STOCK1N-00277 | CCc1nc2cccc2c(NC(CN2CCC(C)CC2)=O)c1C.OC(C(O)=O)=O                             | N | A |
| STOCK1N-00280 | C[C@@](CC1)(C(CC2)[C@@H](C3)C1[C@](C)(CCC(C1)=O)[C@@H]1[C@@H]3O)[C@H]2OC(C)=O | N | A |
| STOCK1N-00282 | COC(c(cc(c(OC)c1)OC)c1NC(c(cc1O)C)cc(OC)c1OC)=O)=O                            | N | A |
| STOCK1N-00284 | Cc(cc1)cc2c1OC(c1c3OCOCC3cc(Cl)c1)=CC2=O                                      | N | N |

|               |                                                                                                              |   |   |
|---------------|--------------------------------------------------------------------------------------------------------------|---|---|
| STOCK1N-00285 | CCCCCCC[N+](C)(C)CCOc(cc1)cc(O2)c1C(C)=CC2=O.[Br-]                                                           | A | A |
| STOCK1N-00286 | CC(C)(C)OC(N[C@@H](Cc1cccc1)C(Oc(cc1)cc(O2)c1C(C)=CC2=O)=O)=O                                                | A | A |
| STOCK1N-00288 | CCOc1cc2nc(NC(N)=N)nc(C)c2cc1                                                                                | N | A |
| STOCK1N-00289 | O=C(CCC(N(C[C@@H](C1)CN23)C[C@H]1C3=CC=CC2=O)=O)NC1C(Cc2ccco2)CCCC1                                          | A | A |
| STOCK1N-00290 | CCCc1nc(C(CC(C)(C)C2)=O)c2o1                                                                                 | N | A |
| STOCK1N-00291 | CCOC1=CC2=N[C@@](c(cccc3)c3N3C)(C3=O)N=C2C=C1                                                                | N | A |
| STOCK1N-00292 | CC(Oc(cc1O)cc(OC(c(cc2)cc(OC(C)=O)c2OC(C)=O)=C2OC(C)=O)c1C2=O)=O                                             | A | A |
| STOCK1N-00296 | CCCCOc(cc1OCCCC)cc(OC(c2cccc2)=C2)c1C2=O                                                                     | N | N |
| STOCK1N-00298 | CCC(C(C)/N1)=C(C)/C1=C/c1c(C)c(C)c(C)[nH]1.Br                                                                | N | A |
| STOCK1N-00299 | CC(Oc(cc1)cc(OC=C2c3cc(cccc4)c4o3)c1C2=O)=O                                                                  | A | A |
| STOCK1N-00300 | CN(C)CCCCN(C)Cc1cc(cccc2)c2o1.Cl                                                                             | N | A |
| STOCK1N-00301 | CC(C)=CCOc(cc1O)cc(OC(c2cccc2)=C2)c1C2=O                                                                     | N | A |
| STOCK1N-00305 | COc(cc1)cc2c1[nH]cc2CCNC(c(cccc1)c1Cl)=O                                                                     | N | N |
| STOCK1N-00308 | CCCc(c(OC)c1)cc2c1OC(C(OCC)=O)=C(c1ccc(C(OCC)=O)o1)C2=O                                                      | A | A |
| STOCK1N-00309 | CN(C)C(CN(C([C@@H](CC1)[C@H]2c3c1[nH]c1c3cccc1)=O)C2=O)=O                                                    | A | A |
| STOCK1N-00310 | CC(NCCCC(N[C@@H](CCC(OCC1ccc1)=O)C(OCC1cccc1)=O)=O)=O                                                        | A | A |
| STOCK1N-00311 | CC(c(ccc/N=C/c1cnccc1)c1)c1O1)=CC1=O                                                                         | N | A |
| STOCK1N-00315 | C[C@@H]([C@@H]([C@H](C1)O2)[C@@](C)(CC3)[C@@H]1[C@H](C1C)[C@H]3[C@@](C)(CC[C@H](C3)O)[C@]13O)[C@]12OCC(C)CC1 | N | A |
| STOCK1N-00316 | CC(C)(CCC1)C(CC2C(N3)=O)=C1CC2C3=O                                                                           | N | A |
| STOCK1N-00320 | OC[C@H]([C@H]([C@H]([C@H]1O)O)O)[C@H]1SC(C(N1)=O)=NNC1                                                       | A | A |

|               |                                                                                                          |   |   |
|---------------|----------------------------------------------------------------------------------------------------------|---|---|
|               | =O                                                                                                       |   |   |
| STOCK1N-00322 | <chem>Cc([nH]nc1-c(ccc(OC)c2)c2O)c1-c(cc1)cc2c1OCCCO2</chem>                                             | N | N |
| STOCK1N-00323 | <chem>Oc(cc1)cc(OC(C(F)(F)F)=C2c3cc(ccc4)c4o3)c1C2=O</chem>                                              | N | A |
| STOCK1N-00324 | <chem>O=C([C@@H]([C@H]([C@@H]1O[C@@H]2OC1)[C@H]([C@@H]13)C2=O)N1C=Cc1c3cccc1)C1(CC(C2)C3)CC3CC2C1</chem> | N | A |
| STOCK1N-00326 | <chem>CN(C)CCCN1C(c2cccc2)OC(COc2cccc2)C1</chem>                                                         | N | A |
| STOCK1N-00328 | <chem>COc1ncnc2c1[nH]c1c2cccc1</chem>                                                                    | N | A |
| STOCK1N-00329 | <chem>CC1(C)c(cccc2)c2N(C2)[C@@]1(/C=C/c1cccc1)NC2=O</chem>                                              | A | N |
| STOCK1N-00330 | <chem>Cc1c/C=C/C(N2)=Nc(cccc3)c3C2=O)c(cc(cc2)OC)c2n1C</chem>                                            | A | A |
| STOCK1N-00331 | <chem>Nc1ncnc2c1nc(CO)[nH]2.O</chem>                                                                     | N | A |
| STOCK1N-00336 | <chem>Oc1cc(-c(c(O)cc(O)c2)c2O)cc(O)c1.O</chem>                                                          | N | A |
| STOCK1N-00337 | <chem>CCc(cc1)ccc1C(C[C@H]1c(c2c3OC)ccc3OC)=Nc(cccc3)c3N1C2=O</chem>                                     | A | A |
| STOCK1N-00338 | <chem>CCCCCCCCNc(c1cc(C)cc(C)c1nc1CC(C)(C)C2)c1C2=O.Cl</chem>                                            | A | A |
| STOCK1N-00340 | <chem>Cn1c(C(N(C)CC(N2C)=O)=O)c2nc1</chem>                                                               | N | A |
| STOCK1N-00347 | <chem>Cc(cc(c1c2)Nc(cc3)cc(O)c3C(O)=O)nc1ccc2OC</chem>                                                   | N | A |
| STOCK1N-00348 | <chem>CCOC([C@H](C)Oc(cc1)c(C)c(OC=C2c3cc(cccc4)c4o3)c1C2=O)=O</chem>                                    | A | A |
| STOCK1N-00349 | <chem>CC(C)[C@@H](C(OC(cc1)cc(OC(C)=C2Oc(cc3)ccc3Cl)c1C2=O)=O)NC(O Cc1cccc1)=O</chem>                    | A | A |
| STOCK1N-00350 | <chem>CC(C)(C)OC(NC1(CCCCC1)C(N[C@@H](CCSC)C(OC)=O)=O)=O</chem>                                          | N | A |
| STOCK1N-00351 | <chem>CC(C)(C)OC(CC(C(NC(CCC(N)=O)C(O)=O)=O)NC(OCc1cccc1)=O)=O</chem>                                    | A | A |
| STOCK1N-00352 | <chem>COC(c(cc1)ccc1N[C@H](c(c1c2OC)ccc2OC)OC1=O)=O</chem>                                               | N | A |
| STOCK1N-00355 | <chem>CCc(c(OC)c1)cc(-c(nc(N)nc2)c2-c(cc2)cc3c2OCCO3)c1O</chem>                                          | A | A |
| STOCK1N-00357 | <chem>CC(C)COc(cc1)ccc1/C(O)=N/C/(NCCCCC(O)=O)=O)=C/c1cccc1</chem>                                       | A | A |
| STOCK1N-00359 | <chem>CCCCc(c(OC(C)=O)c1)cc2c1OC=C(c1ccc(C(OCC)=O)o1)C2=O</chem>                                         | A | A |

|               |                                                                                                       |   |   |
|---------------|-------------------------------------------------------------------------------------------------------|---|---|
| STOCK1N-00361 | COc1cc([C@H](c(cc2)ccc2[N+])([O-])=O)NCC23CCCC3)c2cc1OC.Cl                                            | A | A |
| STOCK1N-00364 | CCCC(CCC)/C(/NC(N1)=O)=N/CCc(cc2)cc(OC)c2OC)C1=O                                                      | A | A |
| STOCK1N-00368 | Oc1ccc(CCC(N(C[C@@H](C2)CN34)C[C@H]2C4=CC=CC3=O)=O)cc1                                                | A | A |
| STOCK1N-00370 | COC(c(cc1)ccc1OC1=COc(cc(cc2)OC([C@H](Cc3c[nH]c4c3cccc4)NC(O Cc3cccc3)=O)=O)c2C1=O)=O                 | A | A |
| STOCK1N-00371 | CCCC(CC[C@]1(C)N2CCCC3c1[nH]c1c3cccc1)C2=O                                                            | N | A |
| STOCK1N-00373 | Oc(cc1)cc(OC=C2Oc(cc3)ccc3Cl)c1C2=O                                                                   | N | A |
| STOCK1N-00374 | CCCCCCCCC1OC1CCCC(C)C                                                                                 | N | N |
| STOCK1N-00377 | Cn1ncc(Nc2c3cccc2OC)c1C3=O                                                                            | A | A |
| STOCK1N-00379 | CC(CC1)CN(CC([C@@H]2C3)C4CC[C@H]2C(C2)[C@H]3[C@@](C)(CC(C3)OC(c5cccc5)=O)[C@H]3C2=O)[C@@H]1[C@@]4(C)O | A | A |
| STOCK1N-00382 | O[C@@H](C1)CN=C2N1C=CC=C2.Cl                                                                          | N | A |
| STOCK1N-00383 | COc(ccc(C[C@@H](C(O)=O)c(cc1)c c(OC)c1OC)c1)c1OC                                                      | N | A |
| STOCK1N-00384 | C[C@](CCc1c(-c2ccc(C)o2)c(cc(C)cc2)c2o1)(c1ccc cc1)O                                                  | N | A |
| STOCK1N-00387 | OC(CCCNc(cccc1)c1C(O)=O)=O                                                                            | N | A |
| STOCK1N-00388 | CC(C)(C)OC(NCC(Oc(cc1)cc(O2)c1C(C)=CC2=O)=O)=O                                                        | N | A |
| STOCK1N-00392 | CC(C)CC1=C(C)c(ccc(OCC=C)c2)c2OC1=O                                                                   | N | N |
| STOCK1N-00396 | CCOC(C([C@@H]1c2ccco2)=C(N)OC(c(cccc2)c2O2)=C1C2=O)=O                                                 | N | A |
| STOCK1N-00400 | CC(C)(CC(C1C(C(C(C(C)C)C2)=O)C2=O)c(cc2)ccc2OCC(OC)=O)=O)C C1=O                                       | N | A |
| STOCK1N-00402 | C=CC1OC(CCCC2)C2C2=CCCCC12                                                                            | N | A |
| STOCK1N-00405 | C[C@@H](Cc1c[nH]c2c1cccc2)NC                                                                          | N | A |
| STOCK1N-00407 | CCOc1ccc2nc(NC(N3)=NCC3=O)nc(C)c2c1                                                                   | A | A |
| STOCK1N-00409 | Oc(cc1O)cc(OC=C2c3ncccc3)c1C2=O                                                                       | N | N |
| STOCK1N-00411 | CCCCc(c(OC)c1)cc2c1OC=C(c1cccc                                                                        | N | A |

|               |                                                                                 |   |   |
|---------------|---------------------------------------------------------------------------------|---|---|
|               | c1)C2=O                                                                         |   |   |
| STOCK1N-00414 | CCOc(cc1)ccc1OC1=C(C)Oc(cc(cc2)OCc3cc(Oc4ccccc4)ccc3)c2C1=O                     | A | A |
| STOCK1N-00416 | C[C@@H](C(NCC(NCC(N)=O)=O)=O)NC(C(Cc(cc1)ccc1OC(OC(C)(C)C)=O)NC(OC(C)(C)C)=O)=O | A | A |
| STOCK1N-00418 | COc(cc1OC)cc(OC(c(cc2)cc(OC)c2OC)=C2OC)c1C2=O                                   | A | N |
| STOCK1N-00419 | OC(CC(C(Nc1c2cccc1)=O)=C2O)=O                                                   | N | A |
| STOCK1N-00422 | COC([C@H](Cc1cccc1)NC(COc(cc1O)cc(OC=C2c(cc3)cc4c3OCCO4)c1C2=O)=O)=O            | A | A |
| STOCK1N-00423 | C/C/CCC1=C(C)CC[C@H]1C(C)=C=N\NC(N)=S                                           | N | A |
| STOCK1N-00425 | CC(C)(Cc1c2cccc1)N=C2N[C@@H](Cc1c[nH]c2c1cccc2)C(O)=O                           | A | A |
| STOCK1N-00426 | Cc1ccc(C(CN2)C(C(C[N+](O-))=O)c3cccc3)(C(OC)=O)C2=O)cc1                         | A | A |
| STOCK1N-00427 | CCC(C)[C@@H](C(O)=O)NCc(c(OC=C1Oc(ccc(Cl)c2)c2Cl)c(cc2)C1=O)c2O                 | A | A |
| STOCK1N-00429 | CCCN(C([C@H](Cc1c2[nH]c3c1cccc3)N1C2c(cc2OC)cc(OC)c2OC)=O)C1=O                  | A | A |
| STOCK1N-00434 | CC1[C@]2(COC(C)=O)COC[C@H]1C1=CCCC(C)(C)C1C2                                    | N | A |
| STOCK1N-00436 | Oc1cc(OC([C@H](CCC(OCc2cccc2)=O)NC(OCc2cccc2)=O)=O)cc(OC(c2cccc2)=C2)c1C2=O     | A | A |
| STOCK1N-00439 | CC(C)(C/C=C\C)/CCC=C(C)C)[C@@H]1OCCN1C(C)=O                                     | N | N |
| STOCK1N-00442 | CC(C)COc(cccc1)c1C(NCCC(O)=O)=O                                                 | N | A |
| STOCK1N-00446 | Cc(cc1OC(CCNC(OCc2cccc2)=O)=O)cc(O2)c1C(c1cccc1)=CC2=O                          | A | A |
| STOCK1N-00450 | CC(c(ccc(OCC(N[C@@H](Cc1cccc1)C(O)=O)=O)c1)c1O1)=CC1=O                          | A | A |
| STOCK1N-00453 | CCCCN(CCCC)CCCC.Nc1c2ncn([C@H]([C@H]3O)O[C@@H](COP(O)(O)=O)[C@@H]3O)c2ncn1      | A | A |
| STOCK1N-00454 | Cc(cc1)c(C)cc1N(CC(C(C(CO)O)O)O)N=O                                             | N | A |
| STOCK1N-00456 | CCCCOc(cc1)ccc1C(N[C@@H](CC(                                                    | N | A |

|               |                                                                                                |   |   |
|---------------|------------------------------------------------------------------------------------------------|---|---|
|               | C)C)C(O)=O)=O                                                                                  |   |   |
| STOCK1N-00458 | CC1(C)Cc2nc(C)c3n(CCCCc1)c(cccc4)c4c3c2CC1                                                     | A | A |
| STOCK1N-00459 | OC(C(O)=O)=O.Oc1ccc(CCNCC(Nc2c(CCC3)c3nc3ccccc23)=O)cc1                                        | A | A |
| STOCK1N-00460 | CC(C)=CCC/C(/C)=C/CCCOC(C)=O                                                                   | N | N |
| STOCK1N-00461 | CCN(C(/C=C/c(cccc1OC)c1O)=Nc1c2ccccc1)C2=O                                                     | A | N |
| STOCK1N-00462 | CCCCCCC(C(CC(OC)=O)CC1)C1=O                                                                    | N | A |
| STOCK1N-00464 | CNC(N(C[C@@H](C1)CN23)C[C@H]1C3=CC=CC2=O)=O                                                    | N | A |
| STOCK1N-00466 | OCC(OC=C1O)=CC1=O                                                                              | N | A |
| STOCK1N-00467 | OC(c1cc(C(O)=O)c([C@@H](C2)[C@@H]2c2ccccc2)cc1)=O                                              | N | N |
| STOCK1N-00469 | CC(C)CC1OC2c(cccc3)c3OC(C)(C)C2C1                                                              | N | A |
| STOCK1N-00470 | C[C@@H](CCc(ccc(OC)c1)c1OC)NC(CCc1ccccc1)=O                                                    | N | N |
| STOCK1N-00471 | C[C@H](CC([C@H](CC1)C2[C@@](C)(CC3)C1CC3=O)[C@]1(C)C[C@H]2O)[C@@H]1C(C)=O                      | N | A |
| STOCK1N-00474 | CCOC([C@@H]1[C@H](CCCC2)[N+]2(C)CCC1)=O.[I-]                                                   | A | A |
| STOCK1N-00475 | CC(C)CCC[C@@H](C)[C@@H](CC1)[C@@](C)(CC2)[C@@H]1[C@H](CC1)[C@H]2[C@]2(C)[C@@H]1CC(OC(C)=O)=CC2 | N | A |
| STOCK1N-00476 | O=C(/C=C/C=C/c1ccccc1)C1=Cc(cccc2)c2OC1=O                                                      | N | A |
| STOCK1N-00481 | C=CCN(C([C@H](Cc1c2[nH]c3c1ccc3)N1C2c(cc2)ccc2O)=O)C1=S                                        | A | A |
| STOCK1N-00483 | COc1ccc([C@H](CC(C2CC2)=O)OC2=O)c2c1OC                                                         | A | A |
| STOCK1N-00484 | OC(CCc1c[nH]c2c1cccc2)=O                                                                       | N | A |
| STOCK1N-00491 | CCc1c(C)[nH]c(/C=C2\N=C(C)C(CC)=C2C)c1C.Br                                                     | N | N |
| STOCK1N-00494 | O=C1OC(c2cccs2)=CC=C1                                                                          | N | A |
| STOCK1N-00496 | CC(NC(N1)=O)=C(CO)C1=O                                                                         | N | A |
| STOCK1N-00497 | COc(ccc(C1(CNC[C@@H](c(cc2)cc(C(N)=O)c2OCc2ccccc2)O)CCCC1)c1)c1OC.Cl                           | A | A |
| STOCK1N-00499 | Oc(cc(c(C1=C2CCC1)c1)OC2=O)c1Cl                                                                | N | A |

|               |                                                                                        |   |   |
|---------------|----------------------------------------------------------------------------------------|---|---|
| STOCK1N-00501 | <chem>Cc(cc1)cc2c1n1c3c2CCC[C@@H]3N(Cc2cccc2)CC1</chem>                                | A | A |
| STOCK1N-00504 | <chem>CC1C(CNCCCN(C)C)CC(C(C)(C)CCC2)=C2C1</chem>                                      | N | A |
| STOCK1N-00505 | <chem>O=C1c(cccc2)c2OC(c(cc2)cc3c2OCCO3)=C1</chem>                                     | N | A |
| STOCK1N-00508 | <chem>CN(C[C@H](C1)CN23)C[C@H]1C3=CC=CC2=O</chem>                                      | N | A |
| STOCK1N-00510 | <chem>CCc(c(OC(C)=O)c1)cc2c1OC(C)=C(c(cc1)cc3c1OCCO3)C2=O</chem>                       | A | A |
| STOCK1N-00511 | <chem>CC(COc1cc(OC(C=C2C)=O)c2c(OCC(C)=C)c1)=C</chem>                                  | N | A |
| STOCK1N-00512 | <chem>Cc1nc(Cc(cc2)cc(OC)c2OC)c(cc(c(OC)c2)OC)c2c1</chem>                              | N | N |
| STOCK1N-00514 | <chem>CC(C)(C)OC(N[C@@H](Cc1c[nH]c2c1cccc2)C(OC(cc1)cc(OC=C2O3ccc3)c1C2=O)=O)=O</chem> | A | A |
| STOCK1N-00519 | <chem>CC(CC1=Cc(cccc2)c2OC1=O)=O</chem>                                                | N | A |
| STOCK1N-00521 | <chem>OC(COc(cc1)cc(O2)c1C(c1cccc1)=CC2=O)=O</chem>                                    | N | A |
| STOCK1N-00523 | <chem>CCCCNCc(cc1)cc(OC)c1OC</chem>                                                    | N | N |
| STOCK1N-00526 | <chem>COC(C(c(cccc1)c1C1=O)=O)=C1O</chem>                                              | N | N |
| STOCK1N-00533 | <chem>CC(Nc(cc1)cc(NC([C@H]2O)O[C@@H](C(CO)O)[C@H]2O)c1NC(C)=O)=O</chem>               | N | A |
| STOCK1N-00538 | <chem>COc1cc(COCC23CCCC3)c2cc1OC</chem>                                                | N | A |
| STOCK1N-00540 | <chem>C[C@](CCc1c2c(cccc3)c3o1)(c1c2oc(C)c1)c1cccc1</chem>                             | N | A |
| STOCK1N-00541 | <chem>CCCCc(c(C)nc1cccc11)c1O</chem>                                                   | N | A |
| STOCK1N-00543 | <chem>CCCCOC(COc(cc1OCC(OCCCC)=O)c(c(O2)c1C(c1cccc1)=CC2=O)=O</chem>                   | A | A |
| STOCK1N-00545 | <chem>C1CC2C3=CCCC3C(c3cccc3)OC2CC1</chem>                                             | N | A |
| STOCK1N-00550 | <chem>Cc(cc1)cc(OC(c(cc2)cc3c2OCCO3)/C2)c1/C2=N/Nc1cccc1</chem>                        | N | A |
| STOCK1N-00552 | <chem>CCc(c(OC(C)C)c1)cc2c1OC(C)=C(c(c1)cc3c1OCCO3)C2=O</chem>                         | A | A |
| STOCK1N-00557 | <chem>CN(C=Nc1c2[nH]c3c1cccc3)C2=O</chem>                                              | N | A |
| STOCK1N-00561 | <chem>COc1ccc([C@@H](N2)Oc(cccc3)c3C2=O)cc1</chem>                                     | N | N |
| STOCK1N-00562 | <chem>CCCCc(c(OC)c1)cc2c1OC=C(c1ccc(C(OCC)=O)o1)C2=O</chem>                            | A | N |

|               |                                                                                                              |   |   |
|---------------|--------------------------------------------------------------------------------------------------------------|---|---|
| STOCK1N-00565 | CC1C=C(C)C2C(c3ccccc3)OCC1[C@<br>@H]2COC(CCl)=O                                                              | N | A |
| STOCK1N-00567 | Cc1c(C(c2c(C)[nH]c3c2cccc3)c(cc2)<br>ccc2OC)c(cccc2)c2[nH]1                                                  | N | A |
| STOCK1N-00569 | CCC(OC[C@@]1(C2)C(C)C=C(C)[C<br>@H]2C(C)OC1)=O                                                               | N | A |
| STOCK1N-00570 | Cc1c(C(CN(C)C)=O)c(cccc2)c2[nH]1                                                                             | N | A |
| STOCK1N-00576 | CC(C(N[C@@H](CCC(O)=O)C(O)=O<br>)=O)Oc(cc1)cc(O2)c1C(c1cccc1)=C<br>C2=O                                      | A | A |
| STOCK1N-00577 | CCC[C@@H](CCC(O)=O)N                                                                                         | N | A |
| STOCK1N-00578 | CC([C@@H]1Oc(c2ccc3)c3OC)[C@<br>@H]2Oc2c1cccc2                                                               | N | N |
| STOCK1N-00580 | CCCCCCCCCCCCCCCC(Nc1c(CCC)c(<br>CCCC)nc2cccc12)=O                                                            | A | A |
| STOCK1N-00583 | CCCc(c(OC(C)C)c1)cc2c1OC(CCC)=<br>C(c(cc1)cc3c1OCO3)C2=O                                                     | A | A |
| STOCK1N-00585 | CC(Oc(cc1OC(C)=O)c(CN(CCC2)[C<br>@@H]2C(O)=O)c(OC=C2Oc(cc3)cc<br>c3F)c1C2=O)=O                               | A | A |
| STOCK1N-00586 | CCOC(C(C)Oc1cc(OC(C=C2C)=O)c2<br>c(OC(C)C(OCC)=O)c1)=O                                                       | N | A |
| STOCK1N-00590 | OC[C@@H](C(O)=O)NC(C(NCC(O)<br>=O)=O)=O                                                                      | N | A |
| STOCK1N-00591 | CC(C)[C@@H](C(OC)=O)NC(C(CSC<br>1(C)C)N1C=O)=O                                                               | A | A |
| STOCK1N-00593 | CC(CCCc(c(C)nc(c1c2)ccc2OC)c1O)=<br>O                                                                        | N | A |
| STOCK1N-00597 | CC(OC[C@@H]([C@@H]([C@H]([C<br>@@H]1OC(C)=O)OC(C)=O)OC(C)=<br>O)OC1Oc(ccc(C(NCCCN1CCCC1)=<br>O)c1)c1OC)=O.Cl | A | A |
| STOCK1N-00598 | CC(CCCCCCCCCCCCCO)(C(O)=O)C(<br>O)=O                                                                         | N | A |
| STOCK1N-00600 | O=C(CCc1c[nH]c2c1cccc2)c1cccc1                                                                               | N | A |
| STOCK1N-00601 | COC(C([C@@H](C(C1O)O)O)O)[C<br>@H]1O                                                                         | N | A |
| STOCK1N-00607 | C(CC1)CCC1(CC1)Cc2c1[nH]c1c2cc<br>cc1                                                                        | N | A |
| STOCK1N-00614 | CCCOC(C1(CCC(C)(C)C2)C2C2=CCC<br>([C@](C)(CC3O)C(CC4)C(C)(C)C3O)<br>[C@@]4(C)[C@]2(C)CC1)=O                  | N | A |
| STOCK1N-00618 | CCC(NC(CC(C)(C)C1)=C([C@H]2c(c                                                                               | N | A |

|               |                                                                                                                       |   |   |
|---------------|-----------------------------------------------------------------------------------------------------------------------|---|---|
|               | <chem>cc(OC)c3)c3OC)C1=O)=C2C(OCC)=O</chem>                                                                           |   |   |
| STOCK1N-00620 | <chem>C[C@]1(CC2)C(C(c3cccc3)=O)=CC1C1C2[C@](C)(CCC(C2)OC(C)=O)C2=CC1</chem>                                          | A | A |
| STOCK1N-00622 | <chem>CC(C)COc(cc1)ccc1C(N/C/C(NCCC O)=O)=C\c(cc1)cc2c1OCO2)=O</chem>                                                 | A | A |
| STOCK1N-00624 | <chem>CC(n1c(cccc2)c2c(C(C(Oc2c3cccc2)=O)=C3O)c1)=O</chem>                                                            | N | A |
| STOCK1N-00625 | <chem>CC(C(C1C(N2)=O)C2=O)C(C)=CC1C=C(C)C</chem>                                                                      | N | A |
| STOCK1N-00626 | <chem>CCc(c(OCC(NCCCC(O)=O)=O)c1)cc(C(C)=C2)c1OC2=O</chem>                                                            | A | A |
| STOCK1N-00629 | <chem>C(CN1CSCC1)c1c[nH]c2c1cccc2.Cl</chem>                                                                           | N | A |
| STOCK1N-00630 | <chem>CCOC(CN(CCCC1)[C@@H]1c1cncc c1)=O</chem>                                                                        | N | A |
| STOCK1N-00632 | <chem>CC(c(ccc(OCC=C)c1C)c1O1)=CC1=O</chem>                                                                           | N | A |
| STOCK1N-00636 | <chem>CCCCC(CC1CC(O)=O)OC1=O</chem>                                                                                   | N | N |
| STOCK1N-00637 | <chem>C[C@@H]1C2(CO)C(C)C=C(C)C1(c1ccco1)OC2</chem>                                                                   | N | A |
| STOCK1N-00641 | <chem>CC(c1c(/C=C2\N=C(/C=C(/C(C)/C3 CCC(OC)=O)\N/C3=C\C(C(CCC(OC)=O)/C3C)=N/C3=C3)C(C(C)OC)=C2 C)[nH]c3c1C)OC</chem> | N | A |
| STOCK1N-00642 | <chem>CC1(C)c(cccc2)c2N(C2)[C@@]1(/C=C/c1cccs1)NC2=O</chem>                                                           | A | N |
| STOCK1N-00644 | <chem>CC(C)(C1)OCC[C@@H]1C(O)=O</chem>                                                                                | N | A |
| STOCK1N-00645 | <chem>CC(C)C[C@@H](C(O)=O)NCc(c(O1) c(cc2)-c(cccc3)c3C1=O)c2O</chem>                                                  | N | A |
| STOCK1N-00651 | <chem>CC(Oc(cc1OC(C)=O)cc(OC(C)=C2c3 csc(C)n3)c1C2=O)=O</chem>                                                        | A | A |
| STOCK1N-00653 | <chem>CCCCCc(cc1)ccc1C(/C=C1/c(cc(cc2) OC)c2OC(c2ccc(CCCCC)cc2)=C1)=O</chem>                                          | A | A |
| STOCK1N-00657 | <chem>OC(CCCC1OC(CCCC(O)=O)OC(CCC C(O)=O)O1)=O</chem>                                                                 | N | A |
| STOCK1N-00658 | <chem>CC(C(C(C1)/O2)[C@](C)(CC3)C1C1 C3[C@](C)(CCC(C3)OC(C)=O)C3=C C1)/C2=C\C)/CC(CNC(C)=O)I</chem>                   | A | A |
| STOCK1N-00660 | <chem>C[C@@H](CN(CCC1cccc1)S([O- ])(=O)=O)O.[K+]</chem>                                                               | A | A |
| STOCK1N-00661 | <chem>CC(C)(Cc1nc2cccc2c(NC2c(C)cc(C)cc2)c11)CC1=O.OCC(O)=O)=O</chem>                                                 | A | A |

|               |                                                                                                                                                                            |   |   |
|---------------|----------------------------------------------------------------------------------------------------------------------------------------------------------------------------|---|---|
| STOCK1N-00662 | CC(C)(Cc1c2ccc3ccccc13)N=C2NCC(O)=O                                                                                                                                        | N | A |
| STOCK1N-00664 | C[C@@H](C(O)=O)NCc(c(OC=C1O c(cc2)ccc2F)c(cc2)C1=O)c2O                                                                                                                     | N | A |
| STOCK1N-00666 | CCCC(Nc1c(C)c(CC)nc2ccccc12)=O                                                                                                                                             | N | A |
| STOCK1N-00667 | CCN(c(cccc1)c1C(O)=C1C(N2)=Nc(c ccc3)c3C2=O)C1=O                                                                                                                           | A | A |
| STOCK1N-00670 | COc(ccc(CC=C)c1)c1O                                                                                                                                                        | N | A |
| STOCK1N-00673 | CCC(C)[C@@H](C(OC)=O)NC(COc( cc1)cc(OC=C2Oc3ccccc3)c1C2=O)=O                                                                                                               | A | A |
| STOCK1N-00674 | CC(C)(CC(C1C(/C=C/c2ccco2)=O)=O)CC1=O                                                                                                                                      | N | A |
| STOCK1N-00678 | CCOC(C([C@]1(c(cccc2)c2N2)C2=O )=C(c2ccccc2)OC(N)=C1C(OCC)=O)=O                                                                                                            | A | A |
| STOCK1N-00680 | CCCC[C@@H](C[N+](C)(C)C)/C=C/c1ccccc1)=O.[I-]                                                                                                                              | A | A |
| STOCK1N-00685 | CC(C)(C)OC(N[C@H](CSCNC(c1cccc1)=O)C(Oc(cc1)cc(OC=C2c(cc3)cc4c3OCCO4)c1C2=O)=O)=O                                                                                          | A | A |
| STOCK1N-00686 | CC(OC[C@@H]([C@@H]([C@H]([C@@H]1OC(C)=O)OC(C)=O)OC(C)=O)O[C@@H]1Sc(c(O)c(c(C(C(OC)=C1C)=O)c2O)C1=O)c2S[C@@H]([C@@H]([C@H]1OC(C)=O)OC(C)=O)O[C@H](COC(C)=O)[C@H]1OC(C)=O)=O | A | A |
| STOCK1N-00687 | COc(cc1)cc2c1[nH]cc2CCNC(c(cc1)ccc1Cl)=O                                                                                                                                   | N | N |
| STOCK1N-00692 | CC(c(ccc(OCC(Oc(cc1)cc(OC(C(F)(F)F)=C2Oc(cc3)ccc3C(OC)=O)c1C2=O)=O)c1)c1O1)=CC1=O                                                                                          | A | A |
| STOCK1N-00694 | CC/N=C1\C(C(C(C(C)C2)=O)=C2N c2c1cccc2.OC(C(O)=O)=O                                                                                                                        | N | A |
| STOCK1N-00700 | CC(C)(C1)OCC[C@@H]1C(COc(cc1)cc(O2)c1C(c1ccccc1)=CC2=O)=O                                                                                                                  | A | A |
| STOCK1N-00706 | CCCc(c(OCC)c1)cc(C2=C3CCC2)c1O C3=O                                                                                                                                        | N | A |
| STOCK1N-00708 | CC(C)([C@@H]1CC=C(C)[C@H]2C1)OC2c(cc1)ccc1O                                                                                                                                | N | A |
| STOCK1N-00709 | CC(N/C/C(N)=O)=C/c(cc1)cc2c1O                                                                                                                                              | N | A |

|               |                                                                                                                                                                                                                                       |   |   |
|---------------|---------------------------------------------------------------------------------------------------------------------------------------------------------------------------------------------------------------------------------------|---|---|
|               | CO2)=O                                                                                                                                                                                                                                |   |   |
| STOCK1N-00710 | CCNCC1(CCCC1)c(cc1)cc(OC)c1OC.<br>Cl                                                                                                                                                                                                  | N | A |
| STOCK1N-00711 | CC(C)CCn1c(N(C)C)nc(N(C)C(N2)=<br>O)c1C2=O                                                                                                                                                                                            | A | A |
| STOCK1N-00712 | CC(C)C[C@@H](C(O)=O)NC(C(C)O<br>c(cc1)cc(O2)c1C(c1cccc1)=CC2=O<br>)=O                                                                                                                                                                 | A | A |
| STOCK1N-00713 | OC(CNC(CCCCCC(NCC(O)=O)=O)<br>=O)=O                                                                                                                                                                                                   | N | A |
| STOCK1N-00714 | CC(CCC1(C)C(C)=CCCC11C)C1OC=<br>O                                                                                                                                                                                                     | N | A |
| STOCK1N-00716 | CCc(c(OC)c1)cc2c1OC=C(c1ccc(C(O<br>CC)=O)o1)C2=O                                                                                                                                                                                      | A | N |
| STOCK1N-00717 | C[C@@H](C(NCC(CC1)CCC1C(O)=<br>O)=O)Oc(cc1)cc(O2)c1C(CCC1)=C1<br>C2=O                                                                                                                                                                 | N | A |
| STOCK1N-00718 | O=C(/C=C/c(cc1)cc2c1OCCO2)c(cc<br>cc1)c1OCc1cccc1                                                                                                                                                                                     | A | N |
| STOCK1N-00719 | COC([C@H](Cc(cc1)ccc1O)NC([C@<br>H](CC1)N(C(OCc2cccc2)=O)C1=O)<br>=O)=O                                                                                                                                                               | A | A |
| STOCK1N-00720 | CC(C)([C@@H](CC1)O[C@]1(C)[C<br>@H]([C@@H](C1)OC(C)=O)[C@](C<br>) (CC2)[C@@]1(C)[C@@H](C[C@H<br>]1OC(C(C3OC(C)=O)OC(C)=O)OC(C<br>OC(C)=O)C3OC(C)=O)[C@@]2(C2)[<br>C@]2(CC2)C1C(C)(C)[C@@H]2OC(<br>C1OC(C)=O)OC(C)=O)OCC1OC(C)<br>=O)O | A | A |
| STOCK1N-00722 | Cc1ncc(CCN2c(cccc3)c3c3c2CCN(C<br>)C3)cc1.Cc1ncc(CCN2c(cccc3)c3c3c<br>2CCN(C)C3)cc1.OS(O)(=O)=O.OS(O<br>) (=O)=O.OS(O)(=O)=O                                                                                                          | A | A |
| STOCK1N-00725 | CC1=CCC(CN(CCCN(C)C)CC2CC=C(<br>C)CC2)CC1                                                                                                                                                                                             | N | A |
| STOCK1N-00726 | CCOC(c1c(CCN(C(c2c3cccc2)=O)C3<br>=O)c(cc(cc2)Br)c2[nH]1)=O                                                                                                                                                                           | A | A |
| STOCK1N-00727 | CC(C)C[C@H](C(NCC(N)=O)=O)NC(<br>[C@H](CCC1)N1C(C(CC1)CCN1C([C<br>@H](CCC1)N1C(OCc1cccc1)=O)=<br>O)=O)=O                                                                                                                              | A | A |
| STOCK1N-00729 | CC(C)C1OCC2(CO)N1C1(CCCCC1)O                                                                                                                                                                                                          | N | A |

|               | C2                                                                                  |   |   |
|---------------|-------------------------------------------------------------------------------------|---|---|
| STOCK1N-00730 | <chem>CC(Oc1c2ccc(OCC(ON(C(CC3)=O)C3=O)=O)c1)=C(c(cc1)cc3c1OCCCO3)C2=O</chem>       | A | A |
| STOCK1N-00734 | <chem>CCCc(c(OC)c1)cc2c1OC(C)=C(c(cc1)cc3c1OCCCO3)C2=O</chem>                       | N | A |
| STOCK1N-00735 | <chem>CC(NC(N[C@H](CSC1)[C@H]1OC(C)=O)=O)=O</chem>                                  | A | A |
| STOCK1N-00736 | <chem>CC(C)(C(CC12)C3)[C@]11[C@@]23C(C)(C)CC[C@H]1O</chem>                          | N | A |
| STOCK1N-00737 | <chem>CCOc(cc1)ccc1C(OCC[C@@H]1C(CCCC2)[N+]2(C)CCC1)=O.[I-]</chem>                  | A | A |
| STOCK1N-00740 | <chem>CC(C)NC[C@@H](c(cc1)cc(O)c1O)O.Cl</chem>                                      | N | A |
| STOCK1N-00742 | <chem>CCCCCCCCOC(O[C@H]1CC2=CCC(C3[C@@](C)(CC4)C(CCCCCC)CC3)C4[C@]2(C)CC1)=O</chem> | A | A |
| STOCK1N-00743 | <chem>OC(COc(cc1OCC(O)=O)cc(O2)c1C(c1cccc1)=CC2=O)=O</chem>                         | N | A |
| STOCK1N-00744 | <chem>CC(C)(C1)CC(NC(C[C@H]2c(cc3)ccc3OC)=O)=C2C1=O</chem>                          | N | A |
| STOCK1N-00746 | <chem>CC(C)(C1)CC(N(CC2)[C@@H](C/C3=N\OC)c4c2cccc4)/C3C1=O</chem>                   | A | A |
| STOCK1N-00751 | <chem>CC(C)=C(C(NCCCC(O)=O)=O)NC(c1cccc1)=O</chem>                                  | N | A |
| STOCK1N-00753 | <chem>O[C@@H](CNCC1(CCCC1)c(cc1)cc2c1OCCO2)COc1cccc1.Cl</chem>                      | N | A |
| STOCK1N-00754 | <chem>CC(C)C(N(CCCN(C)C)C1)OC1c1cccc1</chem>                                        | N | A |
| STOCK1N-00755 | <chem>CCOc(cc1OCC)cc(O2)c1C(c1cccc1)=CC2=O</chem>                                   | N | A |
| STOCK1N-00757 | <chem>COC(CCC/C=C\C1=O)/SC[C@@H]1NC(c1cccc1)=O)=O</chem>                            | N | N |
| STOCK1N-00761 | <chem>CN[C@@H](CCc(c(C1=CC=C2NCCO)c3OC)cc(OC)c3OC)C1=CC2=O</chem>                   | N | A |
| STOCK1N-00762 | <chem>CC(C)(C=C(C)c1c2)Nc1cc(CN(C)C)c2O</chem>                                      | N | A |
| STOCK1N-00764 | <chem>CC(C)[C@H](OC1)OC[C@@]11[C@@H](C)CC(C)=CC1</chem>                             | N | A |
| STOCK1N-00765 | <chem>CC(C1)C(COC(NC2CCCC2)=O)(CO C23)[C@@H](C)C3C1(C)Oc1c2cccc1</chem>             | N | A |
| STOCK1N-00766 | <chem>COc(cc1)cc2c1[nH]cc2CCNC(C1CC</chem>                                          | N | A |

|               |                                                                                                          |   |   |
|---------------|----------------------------------------------------------------------------------------------------------|---|---|
|               | 1)=O                                                                                                     |   |   |
| STOCK1N-00769 | O=C1Oc(ccc(Cl)c2)c2C=C1c(cc1)cc2c1OCO2                                                                   | N | A |
| STOCK1N-00770 | Cc1c(C/C=C/c(cc2)cc(OC)c2OC)=O)c(-c2cccc2)c(cc(cc2)Br)c2n1                                               | A | A |
| STOCK1N-00771 | CCCCCCCC(CC1)[C@](C)(CC2)C1C1C2[C@](C)(CC[C@H](C2)OC(/C=C/c(cc3)cc(OC)c3OC)=O)C2=CC1                     | A | A |
| STOCK1N-00772 | CCCCCc(c(O)c1)cc2c1OC=C(c1nc(C)cs1)C2=O                                                                  | A | N |
| STOCK1N-00777 | OC[C@@H]([C@@H]([C@@H]1O)O)O[C@@H]1n1c2ncnc(NC3CCCC3)c2nc1                                               | N | A |
| STOCK1N-00778 | COc(cc1)cc(S(c2c(C(O)=O)c(OC)ccc2OC)(=O)=O)c1OC                                                          | N | N |
| STOCK1N-00782 | C[C@](CC1)(C(CC2)C3C1[C@@](C)(CCCC1)C1CC3)[C@@]12OCC1                                                    | N | A |
| STOCK1N-00784 | CC(C)(C)OC(NC1(CCCCC1)C(N[C@@H](CCSC)C(O)=O)=O)=O                                                        | N | A |
| STOCK1N-00787 | CN(C)C[C@H](CC(C(c1cccc1)=O)=C)C(c1cccc1)=O.Cl                                                           | N | N |
| STOCK1N-00788 | CC(c(ccc(O)c1)c1O1)=C(C)C1=O                                                                             | N | A |
| STOCK1N-00791 | CCOc(cc1)ccc1OC1=C(C)Oc(cc(cc2)OCC(OC3CC4=CCC(C(CC5)[C@@](C)(CC6)CC5C(C)CCCC(C)C)C6[C@]4(C)CC3)=O)c2C1=O | A | A |
| STOCK1N-00793 | C[C@](CC1)(C(CC2)[C@H](CC3)C1[C@@](C)(CC1)[C@@H]3CC1=O)[C@]2(C(COC(C)=O)=O)O                             | N | A |
| STOCK1N-00794 | CC(C)(C)OC(NCCC(Oc(cc1)cc(O2)c1C(C)=CC2=O)=O)=O                                                          | N | A |
| STOCK1N-00795 | CCCC1OC[C@]2(COC(Nc3cccc3)=O)C(C)C=C(C)C1[C@@H]2C                                                        | N | A |
| STOCK1N-00799 | C[C@](CC1)(C(CC2)C(CC3)C1[C@@](C)(CC1)[C@@H]3C[C@@H]1N=[N+]=[N-])[C@@H]2O                                | A | A |
| STOCK1N-00803 | C[C@@H]1C2(COC(C)=O)C(C)C=C(C)C1C(CN1CCCC1)OC2                                                           | N | A |
| STOCK1N-00807 | CC(OCC(C(C1OC(C)=O)OC(C)=O)OC(C)=O)OC1OC(C(c1ccc2)c2O)=O)=CC1=O)=O                                       | A | A |
| STOCK1N-00810 | CC(C)Oc1ccc(/C=C\C(N[C@@H](C)CSC)C(O)=O)=O)/NC(c2cccc2)=O                                                | A | A |

|               |                                                               |   |   |
|---------------|---------------------------------------------------------------|---|---|
|               | cc1                                                           |   |   |
| STOCK1N-00811 | CCCCCc(c(O)c1)cc(C=C2c3cn(cccc4)c4n3)c1OC2=O                  | A | N |
| STOCK1N-00815 | COc(cccc1)c1C(OC[C@@H]1[C@H](CCCC2)N2CCC1)=O                  | N | A |
| STOCK1N-00816 | C[C@](C1)(CN2C(c(cccc3OC)c3O)N1C[C@]1(C)C2)C1=O               | A | A |
| STOCK1N-00817 | CCCCCc(c(O)c1)cc(C(C)=C2CC(OC C)=O)c1OC2=O                    | N | A |
| STOCK1N-00818 | CCCCCCCCSCC(CN(C[C@@H](C1)C N23)C[C@H]1C3=CC=CC2=O)O          | A | A |
| STOCK1N-00820 | O=C(/C=C/c(cc1)cc2c1oc1c2cccc1)c1cccc1                        | N | N |
| STOCK1N-00823 | OC(C[C@@H](C(O)=O)NC(c1cnccc1)=O)=O                           | N | A |
| STOCK1N-00827 | OCCCCCCCCCCC(C(O)=O)C(O)=O                                    | N | A |
| STOCK1N-00828 | CC(C)C[C@@H](C(O)=O)Nc1ncnc2c1[nH]cn2                         | N | A |
| STOCK1N-00830 | O=C(CCNC(OCc1cccc1)=O)Oc(cc1)cc(OC=C2c(cc3)cc4c3OCCO4)c1C2=O  | A | A |
| STOCK1N-00831 | CCCC(CC(C)(c1csc(NCCNc2nc(C(C)(CC3CCC)OC3=O)cs2)n1)O1)C1=O.Br | A | A |
| STOCK1N-00832 | CCOC(COc(cc1O)cc(OC(c2cccc2)=C2)c1C2=O)=O                     | N | A |
| STOCK1N-00833 | CC(Cc1cccc1)NC(CC(c1cccc1)c(ccc(C)c1C)c1O)=O                  | A | A |
| STOCK1N-00838 | CC(CCO1)(C1NCC(O)=O)O                                         | N | A |
| STOCK1N-00840 | Oc(cccc1C(c2c3cccc2O)=O)c1C3=O                                | N | A |
| STOCK1N-00842 | CC(C(C1)C(C)(C)C1/C1=C\c(cc2)ccc2Cl)/C1=O                     | N | N |
| STOCK1N-00843 | CC(O[C@@H](CO[C@@H]([C@@H]1OC(C)=O)OC(C)=O)[C@@H]1OC(C)=O)=O  | A | A |
| STOCK1N-00844 | OC(c1cc(/C=C/C(c(cccc2)c2O)=O)c2OCOCc2c1)=O                   | N | A |
| STOCK1N-00846 | CC[C@@H](C(OCC)=O)Oc(cc1)cc(O2)c1C(C)=C(CC)C2=O               | N | A |
| STOCK1N-00847 | CCc(c(OC)c1)cc2c1OC(C(OCC)=O)=C(c1csc(-c3cccc3)n1)C2=O        | A | A |
| STOCK1N-00849 | COc1ccc(C(C(C(Oc2c3cccc2)=O)=C3O)C(C(Oc2c3cccc2)=O)=C3O)cc1   | N | A |

|               |                                                                                                                                                                                                                                                                                  |   |   |
|---------------|----------------------------------------------------------------------------------------------------------------------------------------------------------------------------------------------------------------------------------------------------------------------------------|---|---|
| STOCK1N-00851 | CCC[C@](CC1)([C@@](C)(CC2)C1C<br>(CC1)C2[C@@](C)(C[C@H]2C)C1C[<br>C@]12OC1)O                                                                                                                                                                                                     | A | A |
| STOCK1N-00853 | OC(CCCC1)(C1CC1(CC/C2=C\c(cc3)<br>ccc3F)/C2=O)OC1c(cc1)ccc1F                                                                                                                                                                                                                     | A | A |
| STOCK1N-00861 | CC(Oc(cc1OC(C)=O)cc(OC=C2Oc(cc<br>3)ccc3Br)c1C2=O)=O                                                                                                                                                                                                                             | A | A |
| STOCK1N-00863 | CCc(c(O)c1CN(C)C)cc2c1OC=C(c(cc<br>1)cc3c1OCO3)C2=O                                                                                                                                                                                                                              | A | A |
| STOCK1N-00864 | CCC(/N=C(\N)/Nc1nc2cc(OCC)ccc2<br>c(C)n1)=O                                                                                                                                                                                                                                      | A | A |
| STOCK1N-00865 | CCCCCCCC(C1)[C@](C)(CC2)C1C<br>1C2[C@](C)(CC[C@H](C2)SC(CC3C<br>CCCC3)=O)C2=CC1                                                                                                                                                                                                  | N | A |
| STOCK1N-00868 | COc(ccc(CC(c(ccc(O)c1)c1O)=O)c1)<br>c1OC                                                                                                                                                                                                                                         | N | A |
| STOCK1N-00869 | CC(c(cc1OC)c(CC(OC)=O)cc1OC)=O                                                                                                                                                                                                                                                   | N | A |
| STOCK1N-00870 | Cc(cc1)ccc1S(NCCCC(Oc(cc1)cc(OC<br>(c2cccc2)=C2)c1C2=O)=O)(=O)=O                                                                                                                                                                                                                 | A | A |
| STOCK1N-00872 | CCOC(C1=Cc(ccc(OC(C)=O)c2)c2OC<br>1=O)=O                                                                                                                                                                                                                                         | N | A |
| STOCK1N-00874 | CC(CCCCCCCCCCCCCO)(C(O)=O)<br>C(O)=O                                                                                                                                                                                                                                             | N | N |
| STOCK1N-00875 | CC(C)(C1)OCC[C@@H]1C(CN(C)C)<br>O.Cl                                                                                                                                                                                                                                             | N | A |
| STOCK1N-00876 | CN1c2nc3cccc3c(N)c2CCCC1.OC(<br>c1cc(Br)cnc1)=O                                                                                                                                                                                                                                  | A | N |
| STOCK1N-00878 | O=C1Oc(cc(cc2)OCc3cccc3)c2-<br>c2c1cccc2                                                                                                                                                                                                                                         | N | A |
| STOCK1N-00880 | CCCCOP(C)(OC[C@@H]1[C@H](C<br>CCC2)N2CCC1)=S.Cl                                                                                                                                                                                                                                  | N | A |
| STOCK1N-00881 | C[C@H](C(C(C1)O2)[C@](C)(CC3)C<br>1C1C3[C@](C)(CCC(C3)O[C@H]([C<br>@H]([C@@H]4OC(C)=O)O[C@H]([<br>C@H]([C@@H]5OC(C)=O)OC(C)=O<br>)[C@@H](CO(C)=O)[C@@H]5O<br>C(C)=O)O[C@@H](CO(C)=O)[C@<br>@H]4O[C@H]([C@H]([C@H]4OC(<br>C)=O)OC(C)=O)OC[C@H]4OC(C)=O<br>)C3=CC1)[C@]12OCC(C)CC1 | A | A |
| STOCK1N-00885 | CC1(C)Nc(cc(cc2)OC)c2C(C)=C1                                                                                                                                                                                                                                                     | N | N |
| STOCK1N-00887 | CC(C([C@]1(c(cc(cc2)Br)c2N2)C2=<br>O)=C(C)OC(N)=C1C(OCCOC)=O)=O                                                                                                                                                                                                                  | A | A |

|               |                                                                                       |   |   |
|---------------|---------------------------------------------------------------------------------------|---|---|
| STOCK1N-00890 | CC1[C@@H]2C(C)=CC(C)[C@H]1C<br>OC2/C=C/C                                              | N | N |
| STOCK1N-00891 | CCc(c(O)c1)cc2c1OC(CC)=C(c(cc1)c<br>c3c1OCO3)C2=O                                     | A | A |
| STOCK1N-00892 | CC(C)COC(N(c(cccc1)c1O1)C1=O)=<br>O                                                   | N | A |
| STOCK1N-00894 | OC(c(cc1)ccc1NC(c1cnccc1)=O)=O                                                        | N | A |
| STOCK1N-00897 | Cc1c(CCNC(CCC(N(C[C@@H](C2)C<br>N34)C[C@H]2C4=CC=CC3=O)=O)=<br>O)c(cccc2)c2n1-c1cccc1 | A | A |
| STOCK1N-00898 | CC([C@@H](C1)Cc2c1c(C)nn2C(c1<br>cccc1)=O)=C                                          | N | A |
| STOCK1N-00902 | CC(C)C[C@@H](C(N1C2CCC1)=O)<br>NC2=O                                                  | N | A |
| STOCK1N-00903 | CC(OCC(c1c(C)n(C)c(cc2)c1cc2OC)<br>=O)=O                                              | N | A |
| STOCK1N-00905 | CCCCC(C)(C1SC2)NCCN1C2=O.Cl                                                           | N | A |
| STOCK1N-00908 | CN(CC12CCOCC2)Cc(cc2OC)c1cc2<br>OC                                                    | N | A |
| STOCK1N-00910 | COc(ccc(C(c1c(C[C@H]2C(N3CC=C)<br>=O)c(cccc4)c4[nH]1)N2C3=S)c1)c1<br>OC               | A | A |
| STOCK1N-00911 | CC(C)Oc1ccc([C@@H](CC(O)=O)C(<br>O)=O)cc1                                             | N | A |
| STOCK1N-00918 | O=Cc(cc1)cc2c1N(Cc1cccc1)CC2                                                          | N | N |
| STOCK1N-00919 | CC(c1nc(cccc2)c2n1CC(Cn1c(cccc2<br>)c2c2c1cccc2)O)O                                   | A | A |
| STOCK1N-00920 | CC(CC(CCC=C(C)C)=CC1)C1C1OC(C<br>Cl)CO1                                               | N | N |
| STOCK1N-00921 | CC(C)Oc1ccc(/C=C(\C(NCCCC(O)=O<br>)=O)/NC(c2cccc2)=O)cc1                              | A | A |
| STOCK1N-00923 | CS(CCC(C(O)=O)N)=O                                                                    | N | A |
| STOCK1N-00926 | C[C@@H](Cc1c[nH]c2c1cccc2)NC(<br>NC(c(cc1)ccc1OC)=O)=O                                | A | N |
| STOCK1N-00928 | CC(C)(C1C/C2=O)C1/C2=C(\C)/NC(<br>c1cccc1)=O                                          | A | A |
| STOCK1N-00929 | CCCCCCCCCCC(C(C([C@@H](C(C)<br>(C)C1)C(OC)=O)=O)=C1OC)=O                              | A | A |
| STOCK1N-00932 | CN(CC1)Cc2c1n(Cc1cccc1)c1c2ccc<br>c1.OS(c1ccc(cc(cc2)S(O)(=O)=O)c2<br>c1)(=O)=O       | A | A |
| STOCK1N-00934 | CC(C)(CCC1)C(CC2C(OCCN(C)C)=O)<br>=C1CC2C(O)=O                                        | N | A |

|               |                                                                                             |   |   |
|---------------|---------------------------------------------------------------------------------------------|---|---|
| STOCK1N-00943 | <chem>OC(COc(cc1)cc(O2)c1C=CC2=O)=O</chem>                                                  | N | A |
| STOCK1N-00944 | <chem>OC([C@@H](C1)[C@@H](Cc2cccc2)CCC1=O)=O</chem>                                         | N | A |
| STOCK1N-00945 | <chem>CC(C)CCCC(C)C(CC1)[C@](C)(CC2)C1C(CC1)C2[C@@]2(C)C1NCC2.Cl</chem>                     | N | A |
| STOCK1N-00946 | <chem>COc(cc1)cc(C/C=C/c(cc2)cc3c2OCCO3)=O)c1O</chem>                                       | N | A |
| STOCK1N-00947 | <chem>Cc(cc1OC)cc(O2)c1C(c1cccc1)=CC2=O</chem>                                              | N | N |
| STOCK1N-00949 | <chem>COc(ccc(C(O[C@@H]1C[C@H](CC2)N[C@H]2C1)=O)c1)c1OC</chem>                              | N | A |
| STOCK1N-00951 | <chem>CC(C)C(C)(C)C(CC(C)CC1)C1=O</chem>                                                    | N | A |
| STOCK1N-00952 | <chem>C[C@@H](C(c(cc1OC)c(CC2)cc1OC)N2C(CCC1)/C2C1=O)/C2=N\NC(N)=O.Cl</chem>                | A | A |
| STOCK1N-00956 | <chem>CCc(c(OC)c1)cc(C(Cc(cc2)cc3c2OCCO3)=O)c1O</chem>                                      | N | A |
| STOCK1N-00958 | <chem>Cc1nc(C2=COc(c3c(cc4)OCCO3)c4C2=O)cs1</chem>                                          | A | A |
| STOCK1N-00960 | <chem>[O-][N+](c(cc1)ccc1C(OCC([C@@H](C1O)O)O)O[C@@H]1O[C@](CO)(C1O)O[C@H](CO)C1O)=O</chem> | A | A |
| STOCK1N-00961 | <chem>CC(C)(Cc1nc2cccc22)C=Cc1c2N.Cl</chem>                                                 | N | A |
| STOCK1N-00962 | <chem>O=C/C=C/C1=COc(cc(cc2)Br)c2C1=O</chem>                                                | N | N |
| STOCK1N-00963 | <chem>CCCCCC(c1c(C2)c(cccc3)c3[nH]1)NC2C=O</chem>                                           | N | A |
| STOCK1N-00967 | <chem>CC(C12)([C@@H]2C2OC1C=C2)C(OCC=C)=O</chem>                                            | N | A |
| STOCK1N-00968 | <chem>C[C@@H](CCc1c-2c3cc(Br)cc(Br)c3o1)c1c2oc(C)c1</chem>                                  | N | A |
| STOCK1N-00969 | <chem>CCCC(OC(N)=C([C@@]1(c(cccc2)c2N2)C2=O)C(OCC)=O)=C1C(OCC)=O</chem>                     | N | A |
| STOCK1N-00970 | <chem>CC(C)N(CC[C@@]1(Cc2cccc2)CC(C)(C)OCC1)Cc1cccc1.Cl</chem>                              | A | A |
| STOCK1N-00973 | <chem>Nc1c2nc[nH]c2nc(CCO)n1</chem>                                                         | N | A |
| STOCK1N-00980 | <chem>CC(C)C[C@@H](C(N(C)C(C)Cc(cc1)cc2c1OCO2)=O)NC(OC(C)(C)C)=O</chem>                     | A | A |
| STOCK1N-00981 | <chem>CC(C)(CCC1)[C@@H](CC2)[C@]1(C)[C@H](CC/C/C)=C\CO)[C@@]2(C)O</chem>                    | N | N |

|               |                                                                                               |   |   |
|---------------|-----------------------------------------------------------------------------------------------|---|---|
| STOCK1N-00984 | CN(C(C(Cc(cccc1OC)c1OC)(CN(C[C@@H](C1)CN23)C[C@H]1C3=CC=CC2=O)C(N1C)=O)=O)C1=O                | A | A |
| STOCK1N-00985 | CCN(c(cc1)c(c2ccc3)c3c1NC(c1cco1)=O)C2=O                                                      | A | A |
| STOCK1N-00988 | Cc(cc1)cc(OC(c(cc2)cc3c2OCCO3)=C2)c1C2=O                                                      | N | A |
| STOCK1N-00989 | CC(Oc(cc1)cc(C(C)=C2)c1OC2=O)=O                                                               | N | A |
| STOCK1N-00990 | COC(c(cc1)ccc1OC1=C(C(F)(F)F)Oc(cc(cc2)OC([C@H](CCC(OCC3cccc3)=O)NC(OCC3cccc3)=O)=O)c2C1=O)=O | A | A |
| STOCK1N-00991 | CC(C)(C)OC(N[C@@H](CCSC)C(Oc(cc1)cc(OC(C)=C2c(cc3)cc4c3OCCO4)c1C2=O)=O)=O                     | A | A |
| STOCK1N-00997 | O=C1N(CCC2)C2=Nc2c1cccc2                                                                      | N | A |
| STOCK1N-00999 | OC[C@H]([C@H]([C@H]1O)O)O[C@H]1SC(C(N1)=O)=NNC1=O                                             | A | A |
| STOCK1N-01003 | CCCC(Nc1c(CCC)c(CCCC)nc2cccc12)=O                                                             | N | N |
| STOCK1N-01004 | C[C@@H](C(NCC(O)=O)=O)Oc(cc1)cc(O2)c1C(c1cccc1)=CC2=O                                         | A | A |
| STOCK1N-01005 | O=C(c(cccc1)c1C1=Nc2c3cccc2)N1C3=O                                                            | A | A |
| STOCK1N-01006 | CC(C)(C)OC(NCC(Oc(cc1)cc(O2)c1-c(cccc1)c1C2=O)=O)=O                                           | N | A |
